# Supplementary material for: Discovery of the REN11 Locus From Vitis aestivalis for Stable Resistance to Grapevine Powdery Mildew in a Family Segregating for Several Unstable and Tissue-Specific Quantitative Resistance Loci
Source: Front Plant Sci. 2021 Sep 3;12:733899. doi: 10.3389/fpls.2021.733899 (PMC8448101; doi:10.3389/fpls.2021.733899)
Supplement: Supplementary file 1 [file Data_Sheet_1.xlsx]

## Sheet: ST1.MDS
Supplementary Table 1. Quality control based on multidimensional Scaling (MDS) analysis to identify the outlier, highlighted in orange.
Taxa	PC1	PC2	PC3	PC4	PC5
07_3509_219	-0.0971817	-0.0118033	-0.0207467	-0.00641047	0.0171948
Y312_071	-0.0906707	-0.0319754	0.0112909	-0.0466375	0.0155911
Y533_124	-0.0873625	0.0393195	-0.026928	0.0467086	-0.0229704
Y312_062	-0.0857747	0.00616829	-0.00371263	-0.0520023	-0.0295264
07_3509_58	-0.0844581	0.0448369	-0.0240969	0.0481167	-0.0216434
Y312_091	-0.0841052	-0.0309185	-0.0624955	0.0350213	0.0156322
Y533_227	-0.0835028	0.0357374	-0.0677682	0.00628821	-0.0180917
Y533_216	-0.0780996	-0.00308844	-0.0684915	-0.0177619	0.0295204
Y533_122	-0.0769408	0.00602888	-0.0534312	0.0210664	0.0870453
Y516_033	-0.0764078	-0.307645	-0.148663	-0.235609	0.040495
Y312_051	-0.0761608	0.0484005	0.0135876	0.0129719	-0.00980897
07_3509_124	-0.0761019	0.00254586	-0.00151173	0.01823	-0.0380533
Y533_185	-0.0757168	-0.0345627	-0.00222103	-0.0606937	-0.0207923
Y519_184	-0.075644	-0.030325	-0.047591	0.0153265	-0.0297782
Y533_094	-0.0745598	0.0790748	0.00487775	-0.0049575	0.00667631
Y533_189	-0.0731393	-0.0224819	0.0138742	-0.00853801	-0.0388515
Y312_037	-0.0726792	0.0203486	-0.0451965	-0.0731249	0.0285745
07_3509_157	-0.0717758	-0.0375431	-0.0843136	0.0208391	-0.0700758
Y533_176	-0.0709606	-0.00651063	0.0321295	0.0104169	0.0154853
Y533_224	-0.0708714	-0.0438818	-0.0771447	0.0297408	-0.062495
Y533_128	-0.0706832	-0.0601582	0.0799305	0.0675306	0.0152672
07_3509_120	-0.0700903	-0.0358924	-0.00090772	-0.0467657	-0.0193397
Y533_146	-0.0692315	0.0155616	-0.0544754	0.0193841	0.053477
07_3509_62	-0.0688757	-0.059624	0.0734975	0.0658293	0.0164982
Y533_215	-0.0682012	-0.0397949	0.064836	-0.0367562	-0.0368846
07_3509_149	-0.0668753	-0.0414105	0.0636089	-0.0357698	-0.0359252
Y519_196	-0.0665734	0.0543298	-0.0410605	0.00217314	0.0405459
Y533_116	-0.0665365	0.0345657	0.03644	-0.0347527	-0.0340131
Y533_142	-0.0662119	0.0427268	0.00678099	-0.000307439	0.0816046
Y312_043	-0.0644841	-0.0138744	-0.0290719	-0.0486716	-0.0302116
Y312_045	-0.0639277	0.016481	-0.031233	-0.0489629	-0.038632
Y533_240	-0.0638534	-0.0422524	-0.0430654	0.0398676	-0.046886
Y312_018	-0.0632875	-0.0209015	0.0320218	0.0811662	0.0396968
Y533_134	-0.0632379	-0.058692	0.0275017	0.0387756	0.0228196
Y533_239	-0.0631864	-0.0106523	0.0203612	0.00584841	-0.00612163
Y312_096	-0.0629288	0.0648201	0.0406691	-0.0229301	-0.0144304
07_3509_35	-0.0626107	-0.015462	-0.04146	0.013549	0.0798561
Y519_185	-0.0623553	0.00394362	0.0100262	-0.0250218	-0.0435275
Y533_095	-0.061943	-0.00234225	-0.0321978	0.0245053	0.0779151
Y519_155	-0.061864	-0.0209772	0.0035398	0.0393767	0.0441953
C_84_8	-0.0617581	0.0200099	-0.0359643	-0.0636845	-0.0328651
Y533_194	-0.061569	-0.00270564	0.045023	-0.0823439	0.0471222
Y533_144	-0.0614851	0.00755377	-0.025915	-0.0203562	-0.0650906
07_3509_74	-0.0609592	0.0377284	-0.00467499	-0.00218429	0.0753759
Y533_183	-0.0606827	0.00621598	-0.0137981	0.020528	0.0708811
Y533_098	-0.0601065	0.0799265	0.0322557	-0.0380919	0.0274788
07_3509_46	-0.0591369	-0.0288346	-0.0553726	0.0231358	-0.00129331
Y312_059	-0.0588781	-0.0454569	-0.0252236	-0.0128324	0.0014917
07_3509_173	-0.0587626	-0.010355	0.0220366	0.00161703	-0.00444176
07_3509_107	-0.0583614	-0.0361725	0.0558902	-0.0354087	-0.00776191
Y533_117	-0.0583509	-0.0366421	-0.055721	0.0237502	-0.00103849
Y312_033	-0.0579408	0.0224884	-0.0362174	0.000338432	0.0388784
07_3509_44	-0.0577386	0.0386058	0.036627	-0.0416899	-0.0343781
Y533_111	-0.055795	-0.0897063	0.0116155	-0.0440372	0.0275123
07_3509_68	-0.0557363	-0.0569909	0.0234099	0.0349835	0.0197519
Y533_225	-0.055614	0.00447946	-0.0134218	0.0280739	-0.0417629
Y312_093	-0.0550631	-0.0527553	-0.0663374	0.032025	0.00311298
Y519_167	-0.0548728	0.0126771	-0.0672699	0.00583593	0.0320551
Y533_173	-0.0548466	-0.0317961	0.0536072	-0.0388672	-0.00857815
Y533_201	-0.0543627	0.00668288	-0.017367	0.0333189	0.010542
Y312_055	-0.0540796	0.0619847	-0.0152652	-0.0263048	0.0479227
Y312_008	-0.0529875	-0.0597645	-0.0394256	0.00668087	-0.0195717
Y533_213	-0.0528202	-0.000657129	0.0393315	-0.0902866	0.0285864
07_3509_39	-0.0526838	-0.0930447	0.0118621	-0.0527895	0.0293544
Y519_189	-0.0517759	0.0680618	0.00952159	0.00281659	-0.0224238
Y312_085	-0.0516277	-0.0096057	0.0743312	0.00106095	0.0100983
Y519_170	-0.0513111	0.0660584	-0.0186224	-0.0187417	-0.0174827
Y533_243	-0.0511256	0.0564758	-0.0174631	0.0163317	0.024409
Y312_014	-0.0510265	-0.0465273	-0.0055344	0.0200418	-0.0303164
07_3509_4	-0.0508524	0.00233795	-0.0375661	-0.058094	0.061269
Y519_159	-0.0507279	-0.00400745	-0.0697494	-0.00063652	0.0419242
07_3509_55	-0.0506338	0.0315802	-0.00250929	0.0146281	0.00414004
07_3509_158	-0.0505524	-0.00559351	-0.0216516	0.0277284	-0.0397012
Y533_121	-0.0494636	0.0288097	-0.00806536	0.0117019	0.00925199
Y519_173	-0.0494558	0.0482511	-0.0140085	-0.00338933	-0.000296362
Y533_093	-0.0493259	0.0552788	0.0115182	-0.0171353	-0.063828
Y533_249	-0.0491216	0.0303194	-0.0231375	-0.0328033	0.0318238
Y533_161	-0.0486468	0.00318177	0.071628	-0.0535197	-0.0478273
Y312_099	-0.0483843	-0.0324309	0.0299785	0.0221572	-0.0280577
Y533_208	-0.0479011	0.00152646	-0.0166331	0.061641	0.00351716
Y519_165	-0.0468976	-0.0233588	-0.0249695	0.0271316	-0.0399441
Y533_245	-0.0468767	0.0982089	0.0154147	0.0677946	-0.00595852
Y519_138	-0.0466126	0.0315126	0.0104029	0.0010837	-0.0655732
Y533_162	-0.046037	-0.00948786	-0.010682	-0.0322615	-0.0659611
07_3509_177	-0.0459293	0.0604304	-0.00797627	0.0204994	0.0297067
Y533_233	-0.0458149	0.0379384	0.030757	0.00784405	0.0597682
07_3509_185	-0.0456808	0.0273231	-0.0236049	-0.029259	0.0316767
Y533_073	-0.0456352	0.0535582	0.000722533	0.0739337	-0.0614756
Y533_150	-0.0451333	0.0203791	0.00378202	0.0424091	-0.0600777
Y312_088	-0.0450952	-0.0579679	0.0462806	0.0638375	-0.00711557
07_3509_33	-0.0446735	0.0562605	0.0159164	-0.0155808	-0.0658801
Y312_084	-0.0444713	0.0783066	0.0485463	-0.0185381	-0.0233036
Y312_005	-0.0440725	-0.0384066	0.0472456	-0.0586474	-0.0594123
07_3509_218	-0.0438152	-0.028245	0.0871311	0.0624937	0.0564096
07_3509_152	-0.0431996	0.0681221	0.0732402	-0.0580869	0.0304957
Y312_003	-0.0430667	0.043154	-0.0332998	0.044873	-0.0210339
Y533_092	-0.0430567	-0.0509066	-0.0240217	0.0658029	-0.0148722
07_3509_32	-0.0426896	-0.0513252	-0.0287932	0.0619785	-0.0115467
Y519_154	-0.042682	0.0492724	0.0420765	-0.0316017	-0.0264131
Y533_198	-0.0425047	-0.0128473	0.0378471	-0.0298461	-0.0327283
07_3509_83	-0.0424553	0.0243625	0.00655303	0.0429898	-0.0593686
Y533_218	-0.0416626	0.0750237	0.082989	-0.052979	0.0344975
Y533_085	-0.0414904	-0.0289902	-0.0417823	-0.0280579	0.013226
Y316_088a	-0.0411976	-0.0398552	0.0397194	-0.0236375	-0.0231039
Y519_168	-0.0411324	0.0163094	-0.0330271	-0.00963294	0.0115372
07_3509_133	-0.0411296	-0.00837208	0.0398083	-0.026479	-0.0325099
Y533_226	-0.0391798	-0.0144223	-0.0531628	0.0426445	-0.0816471
07_3509_168	-0.0390702	0.0478142	0.0366967	0.0168839	0.0538144
Y312_024	-0.0381642	0.0253743	0.0103378	-0.0945219	0.00518195
Y533_160	-0.0376712	0.000964405	-0.0100422	0.0568292	-0.0389475
07_3509_99	-0.0361816	-0.071607	0.0521415	0.0381306	-0.0243819
07_3509_200	-0.0356923	0.0155091	-0.00163597	0.021202	0.052299
Y312_011	-0.0353844	0.019093	0.0656838	-0.0409971	-0.0427671
07_3509_134	-0.0343547	0.00754802	0.0237829	0.0944762	-0.0162887
Y533_165	-0.0343227	-0.0782505	0.0515705	0.0359017	-0.0202264
Y533_197	-0.0338619	0.0438913	-0.00887272	0.0322573	0.00215643
Y519_199	-0.0330645	0.0594526	-0.00329279	-0.0206682	0.0587961
07_3509_123	-0.0318433	-0.00828573	0.0613879	-0.0501267	0.102455
Y533_112	-0.0317006	-0.0154729	0.0276587	0.0285077	-0.000689717
07_3509_70	-0.0314324	-0.0592829	-0.00929328	0.0259965	-0.0255753
Y533_136	-0.0313816	-0.0665548	-0.00956082	0.0292611	-0.0215669
Y533_199	-0.0306958	-0.00373428	0.0227439	0.0839986	-0.00893308
Y533_151	-0.0303776	0.0806132	-0.00141705	0.103263	-0.0546952
Y519_164	-0.030318	-0.076224	-0.0187544	-0.002525	0.0204734
Y533_137	-0.0302582	0.0284839	-0.0230518	0.0112773	-0.00712771
Y533_188	-0.0299257	-0.0197589	0.0595203	-0.0606911	0.0971025
Y533_115	-0.0278923	-0.023352	0.0467051	0.0574558	0.0133469
Y533_168	-0.0272914	0.0177242	0.0549397	0.0168067	0.00222789
Y533_269	-0.0271431	-0.0571035	-0.0469593	-0.0189748	-0.0352779
Y533273	-0.0269384	-0.00743967	0.0431717	0.0257558	-0.021866
Y533_091	-0.025952	0.00948165	-0.0418603	0.0354325	-0.0293823
Y533_130	-0.0250001	-0.0253681	0.0801814	0.0447328	-0.0248462
Y533_229	-0.0246731	-0.0426204	0.0748027	0.0456218	-0.00814807
Y519_149	-0.0245662	0.0628647	0.0193416	-0.0139368	0.0521719
Y533274	-0.0244775	-0.0279806	-0.00633248	-0.0219194	-0.0446681
07_3509_197	-0.0244442	-0.00511082	0.0399974	0.0230519	-0.0229277
Y519_166	-0.0235549	0.0222909	0.0343885	-0.0437413	0.0330489
Y519_140	-0.0233971	0.0384896	0.0324618	-0.0135839	0.0682353
07_3509_43	-0.022938	-0.0178128	0.0516817	0.0717297	0.0161012
07_3509_64	-0.0218695	-0.0221479	0.0802326	0.0474929	-0.0285259
Y515_086	-0.0218574	-0.0432669	0.0465082	0.00794489	-0.0230105
Y533_181	-0.0210946	0.00218301	0.0809101	-0.00302242	-0.0687564
Y519_177	-0.0204685	-0.045883	0.00784745	-0.000366592	0.0630455
Y519_153	-0.018084	-0.0582361	0.0745135	-0.0504406	-0.032719
Y519_150	-0.0177525	0.00965415	-0.00110222	8.2327e-05	0.0456695
07_3509_115	-0.0173226	0.0132144	0.0645402	0.00617421	-0.0634715
Y219_046	-0.0167019	0.0195897	-0.00494977	0.000259935	0.0222126
Y533_072	-0.0164691	0.0418185	-0.029877	-0.0290577	0.0349027
Y519_148	-0.0158237	0.0100404	0.032912	-0.0345823	-0.0237012
Y533_271	-0.0152728	0.0228731	-0.028622	0.0312829	-0.0407756
Y533_234	-0.0152538	0.016507	0.0616191	0.00221526	0.0693263
Y519_186	-0.0144631	0.0393808	0.0416892	0.0137656	-0.0814121
Y519_171	-0.0144071	0.0328292	-0.0478622	0.051523	0.0214365
Y533_232	-0.0138657	0.0695315	0.0307478	0.0198213	0.0117947
Y533_123	-0.0133979	0.0202137	-0.0373974	-0.00236789	0.0372143
07_3509_28	-0.0132325	0.0221208	0.0425405	0.00562017	-0.0324736
Y533_237	-0.0130832	0.0823867	0.0751422	0.0468114	-0.0184806
Y533_195	-0.0127756	-0.058242	0.00807997	0.032306	0.0734641
07_3509_30	-0.0120661	-0.0318701	0.0223864	0.0450444	0.010198
Y533_090	-0.0118984	-0.0354264	0.0313915	0.0542224	0.014357
Y533_135	-0.0112395	-0.000334294	0.0291747	0.0739177	0.0353596
Y533_087	-0.0103459	0.0266523	0.0516452	0.0162806	-0.0361563
Y533_209	-0.00830968	0.0133897	0.0668191	0.0718233	0.0529756
Y312_009	-0.00777403	-0.0201297	-0.0366479	-0.0134169	0.00421123
Y516_087	-0.00309938	0.0462411	0.0339502	0.0118679	0.0482576
B37_28	-0.00259706	-0.0508251	0.00436763	0.0160139	0.00924657
Y533_205	-0.00116717	-0.0343786	-0.0573353	-0.00447981	-0.0418952
Y533_163	-0.000400263	0.0652728	0.0683939	0.0666061	0.051711
Y533_148	0.00156718	0.0182947	0.0577149	-0.0148308	-0.0804951
07_3509_95	0.00159009	0.0670316	0.066609	0.066064	0.0450026
Y533_129	0.00252302	0.0301743	0.0415426	-0.00778817	-0.01241
Y533_203	0.00320779	0.00411457	-0.0617271	0.0865879	-0.0285834
C_84_37	0.00336978	0.0607922	-0.0992612	-0.0703672	-0.0441769
Y533_230	0.00353137	-0.0107812	-0.0292793	0.0445821	-0.0456812
Y312_016	0.00358687	-0.0176788	0.0335881	-0.00611583	0.00254031
Y533_125	0.00451865	-0.00545875	-0.0049899	-0.0705466	0.0388221
07_3509_175	0.00479005	-0.0126433	0.0162745	-0.0045408	0.0319239
C56_11	0.00503669	0.0446614	-0.00179066	-0.00243612	-0.00689767
Y219_042	0.00529002	0.068882	-0.0420437	-0.0343283	-0.0132904
07_3509_199	0.00584444	0.0103192	-0.00287233	0.00889986	0.0294274
Y533_241	0.0069903	-0.0218222	0.0139306	-0.00725333	0.0468207
07_3509_166	0.00812145	-0.0215685	-0.0823986	-0.0181212	0.00154193
Y533_200	0.00902385	0.0407879	0.0153506	-0.00350701	-0.0499862
Y519_188	0.00957028	0.0374664	0.0058675	-0.0584768	0.0258644
Y312_013	0.00980032	-0.0105473	0.0245237	-0.0594098	0.00273334
Y533_187	0.0109623	0.023728	-0.0682817	-0.0608851	0.0250427
Y533_231	0.0109865	-0.0238721	-0.0801396	-0.0191075	-0.00838655
Y533_211	0.0111419	0.0679034	-0.0830876	-0.0246694	-0.0154405
07_3509_126	0.0111796	0.00731964	0.0148902	-0.0279077	-0.0378099
Y533_132	0.011495	-0.0530761	-0.062127	-0.0238391	-0.053111
Y533_133	0.0117737	0.0145759	0.0186095	-0.0628004	-0.0134216
Y219_044	0.0123924	0.0132839	-0.0457753	-0.0173944	-0.0829448
Y312_066	0.0130032	0.0208636	0.0308111	-0.0419325	-0.015768
Y533_191	0.0130959	-0.00628356	0.0158062	-0.0333217	-0.0413525
Y533_204	0.0132686	-0.0904003	0.0170314	0.00464289	0.0079791
Y533_267	0.0132776	-0.0601996	-0.0473988	0.0435494	0.00831261
C_84_42	0.0133926	0.0266641	-0.0906839	-0.0574741	-0.0106542
07_3509_135	0.0136745	0.0443694	0.0181078	-0.00221753	-0.0505033
07_3509_66	0.0149313	-0.0541141	-0.0632813	-0.0260502	-0.049777
Y519_183	0.0154442	0.0170979	-0.0172509	0.0140187	0.0266253
Y312_073	0.0159363	-0.059238	-0.0938238	0.0440762	0.03474
Y519_174	0.0175709	0.0161089	-0.0496242	-0.00717478	-0.0508906
Y519_143	0.0179249	-0.0179346	-0.0602427	0.0115982	-0.0208589
Y533_235	0.0192421	0.0611018	0.00322038	-0.0448322	0.0211912
Y519_134	0.0199313	-0.0167206	-0.039283	-0.0426123	0.00270215
Y519_176	0.0199715	0.0112351	-0.00674506	-0.0345208	0.0634019
Y533_119	0.019973	-0.0192455	-0.062268	0.0470918	0.0236636
07_3509_51	0.0208345	-0.0145789	-0.0598352	0.0427416	0.0294679
C_84_9	0.0216891	0.0820572	-0.044624	-0.0653145	-0.0549919
Y533_159	0.0218492	0.0247978	-0.0320219	-0.0394026	0.0463388
Y516_055	0.0218667	0.0792524	-0.0422404	-0.0700275	-0.0460473
Y519_141	0.0228787	-0.00842936	0.0023948	-0.0206225	-0.0418757
Y519_163	0.0230847	-0.0334221	-0.0282055	0.00853438	0.0799839
Y519_197	0.0230902	-0.101403	0.0569521	0.024936	0.0249326
07_3509_111	0.0231716	0.0059164	0.0556298	0.0175692	0.0138353
Y312_069	0.0232471	0.00366767	0.0105696	0.0264726	-0.0102162
Y533_190	0.0242414	-0.0314084	-0.048214	0.025306	0.0372495
Y519_132	0.0245563	-0.073996	-0.0657639	0.0604409	0.0123156
Y533_143	0.0246115	0.0121057	0.00132781	-0.0656108	-0.014621
Y533_193	0.0246691	-0.0288988	0.00757306	0.00624074	-0.0735521
Y533_082	0.0247223	0.0444605	0.00705033	-0.0235766	0.052243
Y312_054	0.0248184	-0.0568412	-0.0187283	-0.0543131	0.0473524
07_3509_19	0.0257782	0.0457459	0.00394369	-0.0194946	0.055674
Y533_177	0.026478	-0.0107803	0.0563612	0.0063365	0.0066394
Y533_228	0.0270826	0.016162	-0.0494982	0.0182751	0.0528765
Y515_021	0.0271297	-0.00427767	-0.0424347	0.0204941	-0.0209584
Y533_175	0.0278895	0.0912698	-0.0525451	-0.0372399	-0.00105907
Y516_088	0.0279688	0.0273659	-0.0256301	-0.0509867	0.0381915
Y519_162	0.0280736	-0.0194343	-0.0318381	-0.00438294	0.0773575
07_3509_108	0.0284211	0.080009	-0.063199	-0.0392843	0.000624995
Y312_035	0.0288609	-0.0310409	0.0408889	-0.0482229	-0.0319749
Y533_076	0.0292675	-0.113734	0.0592789	0.0493485	0.00523554
Y533_149	0.0302448	-0.0805586	-0.0388647	0.0426741	0.00579686
Y533_170	0.0304396	-0.0240537	0.00637831	-0.0217496	0.0552469
07_3509_121	0.0308601	-0.0340746	0.00387909	-0.0691883	-0.0517559
07_3509_212	0.0313191	-0.036233	-0.0371806	0.0494126	-0.0159845
Y519_147	0.031506	-0.0309141	-0.0076599	0.0484907	-0.0107504
Y533_248	0.0321122	0.026459	0.0310308	-0.0340451	0.0698293
Y312_002	0.032262	0.0372934	-0.0511352	-0.00174663	0.056628
07_3509_188	0.032807	0.0731853	0.00699145	-0.0447545	-0.0540237
Y312_058	0.0330522	0.035179	-0.0134047	-0.0862528	0.0351984
Y533_184	0.0335599	0.039847	-0.0376766	0.0581657	0.0344318
Y519_137	0.0337633	-0.0224045	-0.0269359	-0.00397414	-0.0605526
Y533_186	0.0337795	-0.0342782	0.00953684	-0.07301	-0.0462143
Y312_052	0.0342325	0.0173734	-0.0535806	0.0106185	0.0291405
07_3509_184	0.0344933	0.0218155	0.0272768	-0.0376313	0.0677407
Y533_156	0.0350981	0.000200742	-0.0289524	0.0177841	0.0514577
Y219_032	0.0355067	0.0699106	0.00243388	-0.0510168	-0.0544211
Y533_147	0.0355208	-0.0541641	0.0503405	0.0117271	-0.052679
07_3509_88	0.0356023	0.00566697	-0.0304776	0.0207402	0.0503221
Y219_030	0.0358099	0.0679026	0.00194496	-0.0526598	-0.0564418
07_3509_86	0.0360714	-0.0246003	-0.0233124	-0.0410076	-0.0520818
Y533_145	0.0361901	-0.0456684	0.00584746	0.0229452	0.0281157
Y533_153	0.0367508	-0.0266524	-0.0257217	-0.0491823	-0.0515704
07_3509_118	0.0379452	0.0362236	-0.0376025	0.0473589	0.0318071
Y533_166	0.0379627	0.0126889	0.00750664	-0.0571558	-0.0382234
Y533_164	0.0389177	0.0380648	-0.0344585	-0.0167021	0.00709073
Y533_244	0.0391652	-0.0439848	0.0273685	-0.0499785	0.0968581
Y533_250	0.0392112	-0.0269484	-0.0445525	0.0494623	0.00694407
Y519_192	0.0401123	0.0785143	0.0134937	-0.00109841	0.0126855
Y533_264	0.0406377	-0.0200179	0.00961867	0.0489438	-0.0077686
Y316_090a	0.0410545	-0.000202456	-0.0686702	-0.0321231	0.0506983
07_3509_48	0.0417823	0.0509408	0.0321508	0.0241957	0.0723541
07_3509_112	0.0418905	0.0618065	-0.0583461	0.0482811	0.0299868
07_3509_137	0.0419623	0.0387992	-0.0282312	0.00286236	0.0125821
07_3509_179	0.0422348	-0.0465484	0.0275487	-0.0399208	0.0952256
07_3509_205	0.0431006	-0.0192676	-0.00175047	-0.00563854	0.000796689
Y519_146	0.0438496	-0.0163161	-0.0401545	0.0043552	-0.0513107
Y519_133	0.0439941	-0.0296253	0.0363936	-0.0145371	-0.0341475
07_3509_186	0.0440885	-0.0295309	-0.0414876	0.0383865	0.00585241
Y533_202	0.0443474	0.0396221	-0.0263665	0.00157785	0.0169042
07_3509_206	0.0446077	-0.0182818	0.0315096	0.0878769	0.0248609
Y519_198	0.0454726	-0.0524625	0.0985428	-0.0307136	0.0149519
Y533_114	0.046263	0.0351105	-0.0116895	0.00531882	0.0615641
Y312_004	0.0480662	0.0038814	-0.0226111	-0.0244944	0.0164745
Y312_057	0.0480964	-0.0286366	0.0268635	0.011977	-0.0413695
Y312_047	0.0490505	-0.0398892	-0.0576625	0.0129143	-0.0409279
07_3509_13	0.0490691	-0.0187937	0.0115405	0.0492555	-0.0111397
Y533_247	0.0491418	0.0575022	0.0315954	0.0115053	0.024031
Y533_207	0.0491982	0.00231789	-0.0323176	0.103932	0.0179501
Y533_219	0.0492896	0.00855813	-0.0150867	-0.00578129	-0.0456352
Y533_210	0.0493741	0.0088374	0.0705112	-0.00657762	0.0218455
Y533_138	0.0496404	-0.0531304	0.0264769	0.0149961	-0.0282839
Y533_179	0.0498521	0.0622362	-0.0600846	0.0566368	0.0329744
Y533_078	0.0499844	-0.0238672	0.0108087	0.0514802	-0.00742484
07_3509_20	0.0501058	0.0416035	-0.0086528	-0.0287706	-0.0155362
07_3509_144	0.0501197	0.0114098	0.0721304	-0.00262742	0.0251839
Y533_074	0.0501283	-0.0215962	0.025143	0.0119607	0.00574132
Y533_217	0.0506035	-0.00271803	0.000370529	0.0318577	0.0739501
Y519_139	0.0509043	0.0244836	0.018342	-0.045345	-0.0135553
07_3509_153	0.0513101	0.0124548	-0.0123687	0.000283062	-0.0429097
07_3509_42	0.0515643	0.0306794	-0.00934885	0.00525008	0.0643455
Y312_064	0.0520656	0.00515945	-0.0122171	0.0221563	0.0181817
Y519_144	0.052126	-0.0271243	-0.0189752	0.00393691	-0.0325409
Y519_152	0.0521504	0.0236876	0.014465	-0.0390403	0.0329411
Y533_268	0.0526859	0.00565754	-0.0200415	-0.0312717	-0.0762933
Y516_080	0.0527184	0.0439303	0.0554222	0.000355993	0.0169271
Y533_242	0.0529307	0.0257781	0.0805791	-0.0164295	-0.0696835
Y533_155	0.0532756	-0.0147782	-0.00790562	0.0308015	-0.0359561
Y533_196	0.0536297	-0.0302112	-0.0177203	-0.0787848	-0.0235309
Y533_080	0.0536768	-0.0141781	-0.00784821	-0.0417832	0.0570222
07_3509_87	0.0537302	-0.0135151	-0.0117296	0.0202943	-0.0375556
Y533_270	0.0537319	0.0406887	-0.0916513	0.0348063	-0.0423955
Y533_131	0.0542012	0.0144858	-0.0412068	-0.00755248	0.0191929
Y519_193	0.054824	0.0231646	0.0437982	0.0374141	-0.042133
07_3509_194	0.0548581	0.0436554	-0.0875084	0.0307591	-0.0452358
Y533_152	0.0552265	0.0992808	0.0281968	-0.0136714	-0.00146767
Y533_157	0.0556302	-0.028462	-0.0674133	0.0386171	-0.0351096
Y516_020	0.0557364	-0.00534973	-0.0216166	-0.0424914	0.0546671
Y533_214	0.0563075	-0.099317	0.070325	-0.0408468	0.0202503
07_3509_151	0.056457	-0.00495649	0.00272606	0.0265355	0.0739361
Y533_120	0.0564804	-0.0181525	-0.0689064	0.047061	0.0296744
Y312_097	0.0567077	-0.0711534	-0.0456428	0.0345963	-0.0452693
07_3509_65	0.0571505	0.0311796	-0.0374753	-0.000518666	0.0172536
Y533_083	0.0580216	0.0368984	-0.0173355	-0.0357302	-0.0118299
07_3509_113	0.0582252	-0.0471914	0.0649821	-0.00569369	0.00312565
07_3509_89	0.058573	-0.0278132	-0.0700848	0.0358148	-0.0374273
Y519_161	0.0592385	-0.021146	-0.0586781	-0.0292255	0.0516266
Y312_020	0.0600349	-0.0299089	0.00491462	-0.0723005	-0.00777739
Y312_034	0.0602234	0.000684486	-0.0649913	0.0444428	-0.00967026
Y519_191	0.060423	0.00290398	-0.0152884	-0.00654599	-0.0161615
Y519_182	0.0608245	-0.0311876	0.0874022	0.00420099	0.0146226
Y533_222	0.0610648	-0.0209166	0.038313	0.00900713	0.0185673
Y533_180	0.0616319	-0.0449898	0.0658607	0.0046204	0.000591814
Y533_172	0.0616935	0.0233815	0.0560389	-0.101146	0.00722157
07_3509_155	0.0621079	-0.026539	0.0387486	0.01386	0.0247725
Y516_078	0.0624444	-0.00169219	-0.00972	0.0199859	-0.0194747
Y219_050	0.0626631	-0.0778478	-0.00384653	-0.0108207	0.0139643
07_3509_213	0.0632347	0.0331551	0.0212194	0.0285811	-0.0384216
07_3509_148	0.0642656	-0.0961172	0.0739495	-0.034748	0.0222205
Y312_038	0.0644462	0.0354058	0.027486	-0.0269757	-0.0342686
Y312_089	0.0645992	-0.0347296	-0.00301367	0.000645137	-0.0606759
Y533_246	0.0660267	0.0331047	-0.014678	-0.0295886	0.0344245
07_3509_9	0.0666963	-0.0155702	0.00795487	-0.0105854	-0.0464074
Y533_077	0.0675712	-0.0216446	0.00565182	-0.0139272	-0.0574453
Y519_135	0.0681329	-0.090115	0.0125148	-0.00586656	0.000768668
07_3509_182	0.0692087	0.0281945	-0.020153	-0.0331301	0.0244965
07_3509_29	0.0745262	-0.0289217	0.0412765	-0.0492789	-0.0146781
Y533_089	0.0750417	-0.017847	0.0450626	-0.0373565	-0.0130866
Y533_096	0.0751675	0.0203429	-0.0111498	0.0565569	-0.0254517
Y533_084	0.0790457	-0.0116517	0.0402338	-0.0149684	-0.0352892
Y312_080	0.0805016	0.0285333	0.00581579	-0.0138186	0.0217488
Y533272	0.0818859	0.0655658	-0.00318204	0.011743	-0.0336975
07_3509_154	0.0822839	-0.00636282	-0.0193174	0.0470364	0.0489576
Y533_081	0.0823456	0.0685739	0.0383209	-0.00978005	-0.0220034
07_3509_18	0.0828398	0.0703996	0.0436299	-0.00618863	-0.020064
Y533_171	0.0829369	0.00981286	-0.0331847	0.020376	0.0162526
07_3509_196	0.0829953	0.0664549	-0.00786316	0.00774951	-0.0379483
Y533_220	0.08584	-0.00178476	-0.0136702	0.0542814	0.0518315
07_3509_21	0.0887611	-0.00284636	0.0402347	-0.0141212	-0.0432469
07_3509_14	0.0933218	-0.00515427	-0.0013289	0.039137	-0.0212333
Y533_079	0.096409	0.00370518	0.00444876	0.0469431	-0.0231752
07_3509_25	0.100995	-0.103794	0.0581099	0.0243909	0.010108
Y533_086	0.101007	-0.1078	0.0579731	0.0238776	0.0051741

## Sheet: ST2.MendelianError
Supplementary Table 2. Quality control based on Mendelian expectations. The number of markers that based on the parents ([1]nOK) match Mendelian expectations, ([2]nBad) do not, or ([3]nSkipped) have missing data for each ([4]Trio) individual. Outlier samples highlighted in orange were discarded from subsequent analysis.
[1]nOK	[2]nBad	[3]nSkipped	[4]Trio
1138	454	374	C_84_9
1347	428	191	C_84_8
1068	404	494	Y516_055
1347	378	241	Y219_032
1374	373	219	Y219_030
1172	360	434	C_84_42
1298	357	311	C_84_37
1190	351	425	07_3509_188
1445	340	181	Y219_044
992	324	650	Y519_197
839	280	847	Y519_163
22	19	1925	Y516_033
172	91	1703	07_3509_4
944	162	860	Y533_189
1032	121	813	Y533_187
1048	120	798	Y533_171
1056	124	786	Y533_224
1065	135	766	Y533_203
1112	120	734	Y533_177
1133	111	722	Y533_083
1177	110	679	Y533_179
1155	140	671	Y533_195
1183	129	654	Y533_180
1223	133	610	Y533_129
1257	117	592	Y533_137
1254	153	559	Y533_194
1273	150	543	Y533_188
1289	140	537	Y533_181
1337	147	482	Y533_190
1374	158	434	Y533_233
1373	189	404	Y533_214
1408	157	401	Y533_186
1409	164	393	Y533_176
1414	172	380	Y312_047
1439	156	371	Y533_231
1453	167	346	Y516_087
1443	184	339	Y533_222
1484	146	336	Y533_166
1464	186	316	Y533_225
1474	177	315	Y533_185
1485	171	310	Y533_085
1503	190	273	Y312_097
1526	167	273	Y533_162
1528	165	273	Y516_020
1510	184	272	Y312_099
1520	174	272	Y312_024
1520	178	268	Y312_088
1503	198	265	Y519_132
1552	152	262	Y312_064
1527	184	255	07_3509_14
1540	172	254	Y533_191
1525	190	251	Y533_193
1527	192	247	07_3509_13
1550	169	247	Y519_133
1569	152	245	Y312_051
1561	163	242	Y312_052
1579	148	239	Y312_013
1603	132	231	Y533_243
1582	155	229	Y516_088
1569	172	225	Y533_131
1583	159	224	Y533_084
1595	147	224	Y533_232
1560	183	223	07_3509_196
1531	215	220	07_3509_62
1567	179	220	Y312_071
1584	165	217	Y312_089
1624	128	214	Y533_175
1545	209	212	07_3509_64
1592	162	212	Y519_141
1588	167	211	07_3509_152
1609	146	211	Y515_021
1596	162	208	Y312_080
1605	155	206	Y533_073
1587	174	205	Y533_230
1602	159	205	Y312_035
1582	186	198	07_3509_21
1615	156	195	Y312_043
1560	212	194	07_3509_175
1612	162	192	Y516_078
1606	170	190	07_3509_44
1619	161	186	07_3509_42
1642	140	184	Y533_170
1588	198	180	07_3509_65
1618	168	180	07_3509_111
1586	201	179	07_3509_32
1624	164	178	Y533_135
1605	184	177	07_3509_200
1586	204	176	07_3509_151
1610	180	176	07_3509_206
1613	179	174	Y312_085
1583	210	173	07_3509_148
1612	183	171	Y519_135
1626	169	171	Y533_199
1631	164	171	Y312_034
1643	156	167	Y312_020
1655	144	167	Y533_143
1619	181	166	07_3509_29
1629	171	166	07_3509_218
1631	172	163	07_3509_18
1627	178	161	07_3509_35
1630	175	161	07_3509_124
1658	149	159	Y519_139
1660	148	158	07_3509_55
1660	149	157	Y519_161
1638	172	156	07_3509_68
1657	153	156	Y312_008
1680	131	155	Y533_161
1685	127	154	Y312_084
1624	189	153	07_3509_197
1642	171	153	07_3509_126
1643	173	150	07_3509_153
1648	168	150	Y312_004
1652	164	150	07_3509_205
1705	111	150	Y519_137
1632	185	149	07_3509_95
1638	179	149	07_3509_43
1651	168	147	07_3509_28
1636	184	146	07_3509_88
1637	183	146	07_3509_179
1652	168	146	07_3509_149
1661	160	145	07_3509_194
1637	186	143	07_3509_25
1639	184	143	07_3509_219
1663	160	143	07_3509_121
1637	187	142	07_3509_168
1663	161	142	07_3509_177
1679	145	142	Y316_090a
1656	169	141	Y519_153
1671	154	141	Y519_191
1640	186	140	07_3509_115
1663	163	140	07_3509_86
1666	161	139	07_3509_87
1682	146	138	Y312_005
1653	176	137	07_3509_173
1656	174	136	07_3509_134
1663	167	136	07_3509_184
1670	160	136	Y533_134
1678	152	136	07_3509_66
1681	149	136	07_3509_19
1618	213	135	07_3509_99
1623	208	135	07_3509_39
1678	153	135	07_3509_118
1674	158	134	07_3509_144
1690	142	134	Y312_069
1650	184	132	07_3509_186
1666	168	132	07_3509_46
1683	152	131	07_3509_212
1685	150	131	07_3509_33
1706	129	131	Y312_045
1692	144	130	Y519_198
1656	181	129	07_3509_157
1671	167	128	07_3509_9
1676	162	128	07_3509_74
1678	160	128	07_3509_199
1680	158	128	07_3509_158
1694	144	128	Y533_219
1666	173	127	07_3509_120
1708	131	127	Y533_202
1671	169	126	07_3509_70
1671	169	126	07_3509_155
1679	163	124	07_3509_20
1698	145	123	07_3509_213
1676	168	122	Y312_093
1680	164	122	Y312_014
1696	149	121	07_3509_107
1663	183	120	07_3509_133
1674	172	120	07_3509_51
1693	153	120	Y312_059
1682	165	119	07_3509_123
1683	164	119	07_3509_48
1704	143	119	Y519_159
1719	128	119	Y516_080
1709	139	118	07_3509_182
1687	163	116	07_3509_30
1689	161	116	07_3509_113
1688	164	114	Y312_062
1687	166	113	07_3509_89
1694	159	113	07_3509_83
1707	146	113	Y533_196
1707	146	113	07_3509_166
1726	127	113	07_3509_137
1659	195	112	Y533_165
1703	151	112	Y312_009
1721	133	112	Y519_143
1698	157	111	07_3509_154
1725	131	110	Y519_152
1726	131	109	07_3509_112
1729	128	109	Y519_138
1718	140	108	Y519_146
1721	137	108	07_3509_185
1715	144	107	Y519_155
1716	143	107	Y519_150
1734	125	107	Y519_199
1696	164	106	07_3509_58
1701	159	106	07_3509_135
1681	180	105	Y533_128
1710	151	105	Y533_205
1717	144	105	Y312_091
1730	132	104	Y533_172
1715	148	103	Y312_073
1710	154	102	07_3509_108
1729	135	102	Y312_033
1723	142	101	Y519_147
1733	133	100	Y519_140
1740	127	99	Y519_148
1737	131	98	Y312_037
1732	140	94	Y316_088a
1734	139	93	Y312_066
1741	133	92	Y312_011
1730	145	91	Y533_087
1746	130	90	Y312_058
1757	121	88	Y312_038
1767	111	88	Y519_171
1745	135	86	Y519_166
1757	124	85	Y519_188
1751	131	84	Y533_213
1764	118	84	Y519_134
1751	133	82	Y219_050
1767	117	82	Y312_002
1738	147	81	Y312_054
1757	128	81	Y533_217
1763	122	81	Y312_055
1757	129	80	Y519_184
1769	119	78	Y519_196
1770	118	78	Y519_149
1751	138	77	Y519_144
1761	128	77	Y533_111
1777	112	77	Y312_016
1774	116	76	Y533_144
1784	106	76	Y533_093
1746	145	75	Y519_177
1758	133	75	Y533_237
1763	129	74	Y533_079
1774	118	74	Y519_186
1779	113	74	Y312_057
1784	108	74	Y533_114
1755	138	73	Y533_198
1770	123	73	Y533_091
1780	113	73	Y533_090
1768	126	72	Y533_164
1769	125	72	Y519_167
1786	108	72	Y312_003
1779	116	71	Y533_150
1781	114	71	Y533_204
1786	109	71	Y519_189
1754	142	70	Y533_117
1771	125	70	Y533_200
1780	116	70	Y533_157
1789	107	70	Y519_185
1750	147	69	Y533_160
1760	137	69	Y533_220
1761	136	69	Y533_229
1761	136	69	Y533_086
1762	135	69	Y533_092
1763	134	69	Y533_125
1769	128	69	Y533_215
1771	126	69	Y533_074
1783	114	69	Y533_148
1785	112	69	Y219_042
1764	134	68	Y312_096
1774	124	68	Y533_136
1791	107	68	Y533_072
1792	106	68	Y519_193
1810	88	68	Y533_270
1767	132	67	Y219_046
1768	131	67	Y533_183
1773	126	67	Y533_080
1777	122	67	Y533273
1786	113	67	Y533_173
1787	112	67	Y519_170
1765	135	66	Y519_154
1768	132	66	Y533_244
1782	118	66	Y533_269
1791	109	66	Y533_121
1805	95	66	Y533_268
1768	133	65	Y533_209
1782	119	65	Y533_216
1783	118	65	Y533_132
1785	116	65	Y533_235
1789	112	65	Y533_133
1796	105	65	Y533_078
1765	137	64	Y533_077
1780	122	64	Y533_145
1781	121	64	Y519_165
1786	116	64	Y533_081
1787	115	64	Y533_210
1787	115	64	Y533_151
1789	113	64	Y533_095
1756	147	63	Y515_086
1764	139	63	Y533_201
1781	122	63	Y533_226
1790	113	63	Y533_123
1808	95	63	Y533_246
1771	133	62	Y519_183
1785	119	62	Y519_182
1793	111	62	Y519_168
1772	133	61	Y312_018
1780	125	61	Y533_218
1787	118	61	Y533_228
1776	130	60	Y533_120
1778	128	60	Y519_176
1778	128	60	Y519_173
1791	115	60	Y533_168
1794	112	60	Y533_098
1774	133	59	Y533_156
1775	132	59	Y533_147
1776	131	59	Y533_208
1782	125	59	Y533_146
1784	123	59	Y533_234
1785	122	59	Y533_239
1787	120	59	Y533_271
1787	120	59	Y533_115
1791	116	59	Y533_094
1798	109	59	Y533_211
1774	134	58	Y533_250
1775	133	58	Y533_163
1777	131	58	Y533_130
1788	120	58	Y533_207
1788	120	58	Y533_138
1811	97	58	Y533_082
1776	133	57	Y533_119
1778	131	57	Y533_159
1779	130	57	Y533_197
1784	125	57	Y533_267
1787	122	57	Y533274
1791	118	57	Y533_227
1792	117	57	Y519_162
1793	116	57	Y533_124
1801	108	57	Y533_089
1807	102	57	Y533_116
1773	137	56	Y533_245
1776	134	56	Y533_122
1779	131	56	Y533_112
1782	128	56	Y533_152
1803	107	56	Y533_242
1773	138	55	Y533_096
1797	114	55	Y533_249
1797	114	55	Y533_142
1803	109	54	Y533_153
1807	105	54	Y533_184
1760	153	53	Y533_076
1785	128	53	Y519_174
1801	112	53	Y519_192
1790	124	52	Y533_241
1793	121	52	Y533_264
1813	101	52	Y533_247
1778	137	51	Y533_149
1790	125	51	Y533272
1792	124	50	Y533_248
1796	121	49	Y533_155
1810	107	49	Y519_164
1802	119	45	Y533_240

## Sheet: ST3.GeneticMapSummary
Supplementary Table 3. Summary statistics of the B37-28 x C56-11 genetic map.
Number of progeny vines	328
rhAmpSeq core genome markers	2000
Markers in linkage groups	1058
Markers that failed to return data	36
Monomorphic markers	502
Distorted markers	404
Male genetic map size (cM)	1151.4
Female genetic map size (cM)	1084.2
Male genome-wide recombination rate (cM/Mbp)	2.51
Female genome-wide recombination rate (cM/Mbp)	2.36
Male genome-wide correlation of the genetic and physical map (r)	0.91
Female genome-wide correlation of the genetic and physical map (r)	0.92
Genome coverage (relative to PN40024 12X.v2 reference genome)	0.934

## Sheet: ST4.rhAmpSeqMap-4way
Supplementary Table 4. AUDPC phenotypes and 4-way genetic map for the biparental mapping family B37-28 × C56-11. As detailed in methods for R/qtl 4-way cross format, 1 1 = AC = 1, 1 2 = AD = 2, 2 1 = BC = 3 and BD = 2 2 = 4. NA = no data.
ID	Leaf_2016	Leaf_2017	Leaf_Blue	Stem_2016	Stem_2017	Stem_Blue	Rachis_2016	Rachis_2017	Rachis_Blue	Berry_2016	Berry_2017	Berry_Blue	1_631086	1_443667	1_268616	1_93619	1_547952	1_741516	1_1170229	1_1060803	1_2145831	1_2306205	1_2424927	1_2822616	1_2718543	1_2955463	1_3142598	1_3758335	1_4330482	1_4681418	1_4517681	1_4613003	1_5045973	1_4913189	1_5610096	1_5191317	1_5368350	1_5702431	1_5940848	1_5860561	1_5782424	1_6320667	1_6615924	1_6215954	1_7092210	1_6875844	1_7243488	1_7478412	1_7710739
chr													1	1	1	1	1	1	1	1	1	1	1	1	1	1	1	1	1	1	1	1	1	1	1	1	1	1	1	1	1	1	1	1	1	1	1	1	1
GeneticPosition (cM)													0	1.5575	2.1745	2.327	2.48	3.2505	3.5575	3.5575	4.1745	7.482	8.2505	8.557	13.2375	23.2225	23.8395	24.457	24.7625	29.2255	29.2255	31.09	32.483	32.483	33.8745	33.8745	35.739	37.1305	37.2835	39.85	39.85	40.1565	40.618	40.618	41.0795	41.2325	41.539	41.692	41.999
Y533_274	163	100.5	131.75	135	36	85.5	219	36	127.5	120	36	78	3	3	3	3	3	3	3	3	3	3	3	3	3	3	3	3	1	1	1	1	1	1	1	1	1	1	1	1	1	1	2	1	2	2	2	2	2
Y533_273	192	104.5	148.25	30.5	36	33.25	240	140.5	190.25	237	101	169	2	2	2	2	2	2	2	2	2	2	2	2	2	2	2	2	2	2	2	2	2	2	2	2	2	2	2	2	2	2	2	2	2	2	2	2	2
Y533_272	204	140	172	135	104.5	119.75	212	NA	198.58	243	NA	232.546	2	2	2	2	2	2	2	2	2	2	2	2	2	2	2	2	2	2	2	2	2	2	2	2	2	2	2	2	2	2	2	2	2	2	2	2	2
Y533_271	57	101	79	27	36	31.5	45	36	40.5	42	36	39	4	4	4	4	4	4	4	4	4	4	4	4	4	4	4	4	4	4	4	4	4	4	4	4	4	4	4	4	4	4	4	4	4	4	4	4	4
Y533_270	231	140.5	185.75	64.5	72	68.25	237	NA	223.58	162	NA	151.546	1	1	1	1	1	1	1	1	1	1	3	3	3	3	3	3	3	3	3	3	3	3	3	3	3	3	3	3	3	3	3	3	3	3	3	3	3
Y533_269	149.5	97	123.25	168.5	108	138.25	27	36	31.5	27	36	31.5	3	3	3	3	3	3	3	3	3	3	3	3	3	3	3	3	3	3	3	3	3	3	3	3	3	3	3	3	3	3	3	3	3	3	3	3	3
Y533_268	27	72	49.5	33	72	52.5	51	36	43.5	27	36	31.5	4	4	4	4	4	4	4	4	4	4	4	4	4	4	4	4	4	4	4	4	4	4	4	4	4	4	4	4	4	4	4	4	4	4	4	4	4
Y533_267	27	68.5	47.75	27	101	64	27	36	31.5	27	36	31.5	1	1	1	1	1	1	1	1	1	1	1	1	1	1	1	1	1	1	1	1	1	1	1	1	1	1	1	1	1	1	1	1	1	1	1	1	1
Y533_264	240	179.5	209.75	234	205.5	219.75	234	115	174.5	237	97	167	1	1	1	1	1	1	1	1	1	1	1	1	1	1	1	1	1	1	1	1	1	1	3	1	3	3	3	3	3	4	4	4	4	4	4	4	4
Y533_250	27	108	67.5	30.5	68.5	49.5	34	36	35	27	36	31.5	1	1	1	1	1	1	1	1	1	1	1	1	1	1	1	1	1	1	1	1	1	1	1	1	1	1	1	1	1	1	1	1	1	1	1	1	3
Y533_249	34	68.5	51.25	20	36	28	20	72	46	20	72	46	3	3	3	3	3	3	3	3	3	3	3	3	3	3	3	3	3	3	3	3	3	3	3	3	3	3	3	3	3	3	3	3	3	3	3	3	3
Y533_248	240	129	184.5	240	144	192	243	NA	229.58	243	NA	232.546	4	4	4	4	4	4	4	4	4	4	4	4	4	4	4	4	4	4	4	4	4	4	2	4	2	2	2	2	2	2	2	2	2	2	2	2	2
Y533_247	222	140	181	121.5	89.5	105.5	240	NA	226.58	240	NA	229.546	4	4	4	4	4	4	4	4	4	4	4	4	4	4	4	4	2	2	2	2	2	2	2	2	2	2	2	2	2	2	2	2	2	2	2	2	2
Y533_246	228	133	180.5	102	108	105	243	165.5	204.25	243	144	193.5	2	2	2	2	2	2	2	2	2	2	2	2	2	2	2	2	1	1	1	1	1	1	1	1	1	1	1	1	1	1	1	1	1	1	1	1	1
Y533_245	49	68.5	58.75	NA	36	36.71	NA	NA	NA	NA	NA	NA	3	3	3	3	3	3	3	3	3	3	3	3	3	3	3	3	3	3	3	3	3	3	3	3	3	3	3	3	3	3	3	3	3	3	3	3	3
Y533_244	172.5	104.5	138.5	63	72	67.5	91.5	68.5	80	75	36	55.5	2	2	2	2	2	2	2	2	2	2	2	2	2	2	2	2	2	2	2	2	2	2	2	2	2	2	2	2	2	2	2	2	2	2	2	2	2
Y533_243	60.5	108	84.25	27	72	49.5	37.5	36	36.75	27	36	31.5	3	3	3	3	3	3	3	3	3	3	3	3	3	3	3	3	3	3	3	3	3	3	3	3	3	3	3	3	3	3	3	3	4	4	4	4	4
Y533_242	189.5	61	125.25	40.5	72	56.25	231	36	133.5	237	36	136.5	4	4	4	4	4	4	4	4	4	4	4	4	4	4	4	2	2	2	2	2	2	2	2	2	2	2	2	2	2	2	2	2	2	2	4	4	4
Y533_241	27	68.5	47.75	46.5	36	41.25	69	68.5	68.75	27	36	31.5	4	4	4	4	4	4	4	4	2	2	2	2	2	2	2	2	2	2	2	2	2	2	2	2	2	2	2	2	2	2	2	2	2	2	2	2	2
Y533_240	107	68.5	87.75	69	36	52.5	34.5	68.5	51.5	27	36	31.5	1	1	1	1	1	1	1	1	1	1	1	1	1	3	3	3	3	3	3	3	3	3	3	3	3	3	3	3	3	3	3	3	3	3	3	3	3
Y533_239	231	104	167.5	150.5	108	129.25	243	114	178.5	222	111.5	166.75	4	4	4	4	4	4	4	4	4	4	4	4	4	4	4	4	4	4	4	4	4	4	4	4	4	4	4	4	4	4	4	4	4	4	4	4	4
Y533_237	243	79	161	NA	86	86.71	NA	NA	NA	NA	NA	NA	2	2	2	2	2	2	2	2	2	2	2	2	2	2	2	2	2	2	2	2	2	2	2	2	2	2	2	2	2	2	2	2	2	2	4	4	4
Y533_235	30.5	104.5	67.5	27	36	31.5	85.5	61	73.25	48	36	42	4	4	4	4	4	4	4	4	4	4	4	4	4	4	4	4	4	4	4	4	4	4	4	4	4	4	4	4	4	4	4	4	4	4	4	4	4
Y533_234	233	100.5	166.75	NA	93.5	94.21	NA	93.5	106.92	NA	93.5	103.954	3	3	3	3	3	3	3	3	3	3	3	3	3	3	3	3	4	4	4	4	4	4	4	4	4	4	4	4	4	4	4	4	4	4	4	4	4
Y533_233	240	129	184.5	72.5	72	72.25	240	72	156	240	72	156	3	3	3	3	3	3	3	3	3	3	3	3	3	3	3	3	3	3	3	3	3	3	3	3	3	3	3	3	3	3	3	3	3	3	3	3	3
Y533_232	189	108	148.5	46.5	68.5	57.5	201	NA	187.58	189	NA	178.546	4	4	4	4	4	4	4	4	3	3	3	3	3	3	3	3	3	3	3	3	3	3	3	3	3	3	3	3	3	3	3	3	3	3	3	3	3
Y533_231	51	97	74	93	125.5	109.25	63	61	62	27	61	44	1	1	1	1	1	1	1	1	1	1	3	3	3	3	3	3	3	3	3	3	3	3	3	3	3	3	3	3	3	3	3	3	3	3	3	3	3
Y533_230	30.5	68.5	49.5	78	61	69.5	58.5	NA	45.0803	58.5	NA	48.0464	2	2	2	2	2	2	2	2	4	4	4	4	4	4	4	4	4	4	4	4	4	4	4	4	4	4	4	4	4	4	4	4	4	4	4	4	4
Y533_229	233.5	72	152.75	34.5	53.5	44	231	89.5	160.25	237	68.5	152.75	2	2	2	2	2	2	2	2	2	2	2	2	2	2	2	2	2	2	2	2	2	2	2	2	2	2	2	2	2	2	2	2	2	2	4	4	4
Y533_228	165.5	68.5	117	27	36	31.5	177	101	139	27	101	64	3	3	3	3	3	3	3	3	3	3	3	3	3	3	3	3	3	3	3	3	3	3	3	3	3	3	3	3	3	3	3	3	3	3	3	3	3
Y533_227	54	68.5	61.25	27	36	31.5	57	36	46.5	27	36	31.5	3	3	3	3	3	3	3	3	3	3	3	3	3	3	3	3	3	3	3	3	3	3	3	3	3	3	3	3	3	3	3	3	3	3	3	3	3
Y533_226	42	36	39	69	36	52.5	72	36	54	48	36	42	3	3	3	3	3	3	3	3	3	3	3	3	3	3	3	3	3	3	3	3	3	3	3	3	3	3	3	3	3	3	3	3	3	3	3	3	3
Y533_225	216	108	162	219	161.5	190.25	153	NA	139.58	160.5	NA	150.046	2	2	2	2	2	2	2	2	2	2	2	2	2	2	2	2	2	2	2	2	2	2	2	2	2	2	2	2	2	2	2	2	2	2	2	2	2
Y533_222	175.5	NA	164.265	243	NA	242.29	133	NA	119.58	87	NA	76.5464	3	4	4	2	2	2	2	2	4	4	4	4	4	4	4	4	4	4	4	4	4	4	4	4	4	4	4	4	4	4	4	4	4	4	4	4	4
Y533_220	62	72	67	34.5	61	47.75	27	61	44	27	36	31.5	3	3	3	3	3	3	3	3	3	3	3	3	3	3	3	3	3	3	3	3	3	3	4	3	4	4	4	4	4	4	4	4	4	4	4	4	4
Y533_219	27	93.5	60.25	27	36	31.5	NA	NA	NA	NA	NA	NA	4	4	4	4	4	4	4	4	4	4	4	4	4	4	4	4	4	4	4	4	4	4	4	4	4	4	4	4	4	4	4	4	4	4	4	4	4
Y533_218	70.5	97	83.75	69	72	70.5	33	36	34.5	27	36	31.5	4	4	4	4	4	4	4	4	4	4	4	4	4	4	4	4	4	4	4	4	4	4	4	4	4	4	4	4	4	4	4	4	4	4	4	4	4
Y533_217	56	53.5	54.75	27	36	31.5	27	36	31.5	27	36	31.5	4	4	4	4	4	4	4	4	4	4	4	4	4	4	4	4	4	4	4	4	4	4	4	4	4	4	4	4	4	4	4	4	4	4	4	4	4
Y533_216	57	86	71.5	30.5	36	33.25	27	36	31.5	27	36	31.5	3	3	3	3	3	3	3	3	3	3	3	3	3	3	3	3	3	3	3	3	3	3	3	3	3	3	3	3	3	3	3	3	3	3	3	3	3
Y533_215	207	103.5	155.25	93	72	82.5	189	72	130.5	183	72	127.5	3	3	3	3	3	3	3	3	3	3	3	3	3	3	3	3	3	3	3	3	4	3	4	4	4	4	4	4	4	4	4	4	4	4	2	2	2
Y533_214	30	68.5	49.25	33	68.5	50.75	111.5	68.5	90	27	36	31.5	1	2	2	2	2	2	2	2	2	2	2	2	2	2	2	2	2	2	2	2	2	2	2	2	2	2	2	2	2	2	2	2	2	2	2	2	2
Y533_213	151	68.5	109.75	NA	68.5	69.21	NA	NA	NA	NA	NA	NA	1	1	1	1	1	1	1	1	1	1	1	1	1	1	1	3	3	3	3	3	3	3	3	3	3	3	3	3	3	3	3	3	3	3	3	4	4
Y533_211	104	93	98.5	37.5	36	36.75	37.5	68.5	53	27	68.5	47.75	1	1	1	1	1	1	1	1	3	3	3	3	3	3	3	3	3	3	3	3	3	3	3	3	3	3	3	3	3	3	3	3	3	3	3	3	3
Y533_210	113.5	93.5	103.5	51	53.5	52.25	177	36	106.5	178.5	36	107.25	3	3	3	3	3	3	4	4	4	4	4	4	4	4	4	4	4	4	4	4	4	4	4	4	4	4	4	4	4	4	4	4	4	4	4	4	4
Y533_209	225	108	166.5	63	36	49.5	221	68.5	144.75	186	68.5	127.25	1	1	1	1	1	1	1	1	1	1	1	1	1	1	1	1	1	1	1	1	1	1	1	1	1	1	1	1	1	1	1	1	1	1	1	1	1
Y533_208	225	111	168	69.5	68.5	69	240	143.5	191.75	240	68.5	154.25	2	2	2	2	2	2	2	2	1	1	1	1	1	1	1	1	1	1	1	1	1	1	3	1	3	3	3	3	3	3	3	3	3	3	3	3	3
Y533_207	231	111.5	171.25	63	36	49.5	240	104	172	230	72	151	3	3	3	3	3	3	3	3	3	3	3	3	3	3	3	3	3	3	3	3	3	3	3	3	3	3	3	3	3	3	3	3	3	3	3	3	3
Y533_205	75.5	104.5	90	55.5	61	58.25	173.5	NA	160.08	78	NA	67.5464	1	1	1	1	1	1	3	3	3	3	3	3	3	3	3	3	3	3	3	3	3	3	3	3	3	3	3	3	3	3	3	3	3	3	3	3	3
Y533_204	114	104.5	109.25	45	53.5	49.25	202	72	137	166.5	72	119.25	4	4	4	4	4	4	4	4	2	2	2	2	2	2	2	2	2	2	2	2	2	2	2	2	2	2	2	2	2	2	2	2	2	2	2	2	2
Y533_202	208.5	75.5	142	45	36	40.5	234	61	147.5	231	36	133.5	4	4	2	2	2	2	2	2	2	2	2	2	2	2	2	2	1	1	1	1	1	1	1	1	1	1	1	1	1	1	1	1	1	1	1	1	1
Y533_201	237	NA	225.765	NA	NA	NA	NA	NA	NA	NA	NA	NA	3	3	3	3	3	3	3	3	3	3	3	3	3	3	3	3	3	3	3	3	3	3	3	3	3	3	3	3	3	3	3	3	4	4	4	4	4
Y533_200	225	68.5	146.75	NA	61	61.71	NA	NA	NA	NA	NA	NA	4	4	4	4	4	4	4	4	4	4	4	4	4	4	4	4	4	4	4	4	4	4	4	4	4	4	4	4	4	4	4	4	4	4	4	4	4
Y533_199	203	104.5	153.75	34.5	72	53.25	237	157	197	240	122	181	1	1	3	3	3	3	3	3	3	3	3	3	3	3	3	3	3	3	3	3	3	3	3	3	3	3	3	3	3	3	3	3	3	3	3	3	3
Y533_198	41.5	61	51.25	27	36	31.5	34.5	NA	21.0803	27	NA	16.5464	2	2	2	2	2	2	2	2	2	2	2	4	4	4	4	4	4	4	4	4	4	4	4	4	4	4	4	4	4	4	4	4	4	4	4	4	4
Y533_197	70.5	93.5	82	27	36	31.5	27	36	31.5	27	36	31.5	2	2	2	2	2	2	4	4	4	4	4	4	4	4	4	4	4	4	4	4	4	4	4	4	4	4	4	4	4	4	4	4	4	4	4	4	4
Y533_196	165	133	149	147	125.5	136.25	219	108	163.5	207	108	157.5	4	4	4	4	4	4	4	4	4	4	4	4	4	4	4	4	4	4	4	4	4	4	4	4	4	4	4	4	4	4	4	4	4	4	4	4	4
Y533_194	48.5	68.5	58.5	75	61	68	45	68.5	56.75	27	68.5	47.75	1	2	2	2	2	2	2	2	2	2	2	2	2	2	2	2	2	2	2	2	2	2	2	2	2	2	2	2	2	2	2	2	2	2	2	2	2
Y533_193	52.5	86	69.25	147	36	91.5	111	72	91.5	34.5	93.5	64	4	4	4	4	4	4	4	4	4	4	4	2	2	2	2	2	2	2	2	2	2	2	2	2	2	2	2	2	2	2	2	2	2	2	2	2	2
Y533_191	57	75.5	66.25	190.5	36	113.25	138.5	NA	125.08	27	NA	16.5464	3	3	3	3	3	3	3	3	3	4	4	4	4	4	4	4	4	4	4	4	4	4	4	4	2	2	2	2	2	2	2	2	2	2	2	2	1
Y533_190	46	111	78.5	27	36	31.5	117	68.5	92.75	27	68.5	47.75	1	1	1	1	1	1	1	1	1	1	3	3	3	3	3	3	3	3	3	3	3	3	3	3	3	3	3	3	3	3	3	3	3	3	3	3	3
Y533_188	71.5	68.5	70	27	36	31.5	34.5	68.5	51.5	27	36	31.5	4	4	2	2	2	2	2	2	2	2	2	2	2	2	2	2	2	2	2	2	2	2	2	2	2	2	2	2	2	2	2	2	2	2	2	2	2
Y533_186	27	68.5	47.75	63	86	74.5	27	36	31.5	27	36	31.5	1	1	1	1	1	1	1	1	1	1	1	1	1	1	1	1	1	1	1	1	1	1	1	1	1	1	1	1	1	1	1	1	1	1	1	1	1
Y533_185	27	93.5	60.25	63	93.5	78.25	27	68.5	47.75	27	68.5	47.75	1	1	1	1	1	1	1	1	1	1	1	1	1	1	1	1	1	1	1	1	1	1	1	1	1	1	1	1	1	1	1	1	1	1	1	1	1
Y533_184	243	NA	231.765	NA	NA	NA	NA	NA	NA	NA	NA	NA	1	1	1	1	1	1	1	1	1	1	1	1	1	1	1	1	1	1	1	1	1	1	1	1	1	1	1	1	1	1	1	1	1	1	3	3	3
Y533_183	177.5	101	139.25	34.5	68.5	51.5	120.5	100.5	110.5	44.5	68.5	56.5	1	1	1	1	1	1	1	1	1	1	1	1	1	1	1	1	1	1	1	1	1	1	3	1	3	3	3	3	3	3	3	3	3	3	3	3	3
Y533_181	225	97	161	133.5	36	84.75	234	122	178	234	97	165.5	1	1	1	1	1	1	1	1	1	1	1	1	1	1	1	1	1	1	1	1	1	1	1	1	1	1	1	1	1	1	1	1	1	1	1	1	1
Y533_176	45	129.5	87.25	219	158	188.5	111	68.5	89.75	111	68.5	89.75	1	1	1	1	1	1	1	1	1	1	1	1	1	1	1	1	1	1	1	1	1	1	1	1	1	1	1	1	1	1	1	1	1	1	1	1	1
Y533_175	38	93.5	65.75	85	36	60.5	42	72	57	27	72	49.5	1	1	1	1	1	1	1	1	1	1	1	1	1	1	1	1	1	1	1	1	1	1	1	1	1	1	1	1	1	1	1	1	1	1	1	1	1
Y533_173	163	140	151.5	88.5	111	99.75	64	72	68	90	108	99	4	4	4	4	4	4	4	4	4	4	4	4	4	4	4	4	4	4	4	4	4	4	4	4	4	4	4	4	4	4	4	4	4	4	4	4	4
Y533_172	151.5	104.5	128	63	61	62	220	140	180	205	108	156.5	4	4	4	4	4	4	4	4	4	4	4	4	4	4	4	4	4	4	4	4	4	4	2	4	2	2	2	2	2	2	2	2	2	2	2	2	2
Y533_170	225	144	184.5	125	125.5	125.25	216.5	68.5	142.5	187.5	61	124.25	4	4	4	4	4	4	4	4	4	4	4	4	4	4	4	4	4	4	4	4	4	4	4	4	4	4	4	4	4	4	4	4	4	4	4	4	4
Y533_168	27	43	35	27	36	31.5	27	93.5	60.25	27	36	31.5	3	3	3	3	3	3	3	3	3	3	3	3	3	3	3	3	3	3	3	3	3	3	3	3	3	3	3	3	3	3	3	3	3	3	3	3	4
Y533_166	63	108	85.5	45	108	76.5	27	36	31.5	27	36	31.5	1	1	1	1	1	1	1	1	1	1	1	1	1	1	1	1	1	1	1	1	1	1	1	1	1	1	1	1	1	1	1	1	1	1	1	1	1
Y533_165	177	68.5	122.75	NA	68.5	69.21	NA	NA	NA	NA	NA	NA	2	2	2	2	2	2	2	2	2	2	2	2	2	2	2	2	2	2	2	2	2	2	2	2	2	2	2	2	2	2	2	2	2	2	2	2	2
Y533_164	187	133	160	118.5	108	113.25	167.5	36	101.75	158.5	72	115.25	3	3	3	3	3	3	3	3	3	3	3	3	3	3	3	3	3	3	3	3	3	3	3	3	3	3	3	3	3	3	3	3	3	3	3	3	4
Y533_163	207	104.5	155.75	33	36	34.5	140	36	88	168	72	120	3	3	3	3	3	3	3	3	3	3	3	3	3	3	3	3	4	4	4	4	4	4	4	4	4	4	4	4	4	4	4	4	4	4	4	4	4
Y533_162	225	140.5	182.75	63	72	67.5	195	93.5	144.25	210	86	148	4	4	4	4	4	4	2	2	2	2	2	2	2	2	2	2	2	2	2	2	2	2	4	2	4	4	3	3	3	3	3	3	3	3	3	3	3
Y533_161	27	108	67.5	93	132.5	112.75	27	68.5	47.75	27	68.5	47.75	2	2	2	2	2	2	2	2	2	2	2	2	2	2	2	2	2	2	2	2	2	2	2	2	2	2	2	2	2	2	2	2	2	2	2	2	2
Y533_160	39	72	55.5	45	61	53	27	36	31.5	27	36	31.5	1	1	1	1	1	1	1	1	1	1	1	1	1	1	1	1	1	1	1	1	1	1	1	1	1	1	1	1	1	1	1	1	1	1	3	3	3
Y533_159	237	72	154.5	NA	144	144.71	NA	NA	NA	NA	NA	NA	3	3	3	3	3	3	3	3	3	3	3	3	3	3	3	3	3	3	3	3	3	3	3	3	3	3	3	1	1	1	1	1	1	1	1	1	1
Y533_157	231	140.5	185.75	66	108	87	215	154	184.5	224	165.5	194.75	1	1	1	1	1	1	1	1	1	1	1	1	1	1	1	1	1	1	1	1	1	1	1	1	1	1	1	1	1	1	1	1	1	1	1	1	1
Y533_156	95	93.5	94.25	27	61	44	76	36	56	76	36	56	4	4	4	4	4	4	4	4	4	4	4	4	4	4	4	4	4	4	4	4	4	4	4	4	4	4	4	4	4	4	4	4	4	4	4	4	4
Y533_155	39	68.5	53.75	27	36	31.5	27	36	31.5	63	36	49.5	2	2	2	2	2	2	2	2	2	2	2	2	2	2	2	2	2	2	2	2	2	2	4	2	4	4	4	4	4	4	4	4	4	4	4	4	4
Y533_153	150	68.5	109.25	213	111	162	81	61	71	27	36	31.5	3	3	3	3	3	3	3	3	3	3	3	3	3	3	3	3	3	3	3	3	3	3	3	3	3	3	3	3	3	3	3	3	3	3	3	3	3
Y533_152	225	108	166.5	27	72	49.5	183	NA	169.58	240	NA	229.546	3	3	3	3	3	3	3	3	3	3	3	3	3	3	3	3	3	3	3	3	4	3	4	4	4	4	4	4	4	4	4	4	4	4	4	4	4
Y533_151	167	111.5	139.25	27	36	31.5	199	NA	185.58	216.5	NA	206.046	1	1	1	1	1	1	1	1	1	1	1	1	1	1	1	1	1	1	1	1	1	1	1	1	1	1	1	1	1	1	1	1	1	1	1	1	3
Y533_150	27	136	81.5	27	72	49.5	27	104.5	65.75	27	97	62	4	4	4	4	4	4	4	4	4	4	4	4	4	4	4	4	4	4	4	4	4	4	4	4	4	4	4	4	4	4	4	4	4	4	4	4	4
Y533_149	142.5	118	130.25	63	86	74.5	240	143	191.5	185	93.5	139.25	1	1	1	1	1	1	1	1	1	1	1	1	1	1	1	1	1	1	1	1	1	1	3	1	3	3	3	3	3	3	4	3	4	4	4	4	4
Y533_148	228	151	189.5	207	72	139.5	243	72	157.5	243	72	157.5	2	2	2	2	2	2	4	4	4	4	4	4	4	4	4	4	4	4	4	4	4	4	4	4	4	4	4	4	4	4	4	4	4	4	4	4	4
Y533_147	113.5	121.5	117.5	75	36	55.5	240	89.5	164.75	240	72	156	2	2	2	2	2	2	2	2	2	2	2	2	2	2	2	2	2	2	2	2	2	2	2	2	2	2	2	2	2	2	2	2	2	2	2	2	2
Y533_146	45	104	74.5	27	36	31.5	27	72	49.5	27	47	37	3	3	3	3	3	3	3	3	3	3	3	3	3	3	3	3	3	3	3	3	3	3	3	3	3	3	3	3	3	3	3	3	3	3	3	3	3
Y533_145	42	97	69.5	63	78.5	70.75	27	61	44	27	36	31.5	4	4	4	4	4	4	4	4	4	4	4	4	4	4	4	4	4	4	4	4	4	4	4	4	4	4	4	4	4	4	4	4	4	4	4	4	4
Y533_144	NA	NA	NA	NA	NA	NA	NA	NA	NA	NA	NA	NA	1	1	1	1	1	1	1	1	1	1	1	1	1	1	1	1	1	1	1	1	1	1	1	1	1	1	1	1	1	1	1	1	1	1	1	1	1
Y533_143	243	133	188	237	144	190.5	243	216	229.5	240	258.5	249.25	1	1	1	1	1	1	2	2	2	2	2	2	2	2	2	2	2	2	2	2	2	2	2	2	2	2	2	2	2	2	2	2	2	2	2	2	2
Y533_142	225	121.5	173.25	51	89.5	70.25	164	100.5	132.25	165.5	68.5	117	3	3	3	3	3	3	3	3	3	3	3	3	3	3	3	3	3	3	3	3	3	3	3	3	3	3	3	3	3	3	3	3	3	3	3	3	4
Y533_138	198	165.5	181.75	45	61	53	226.5	169	197.75	177	144	160.5	4	4	4	4	4	4	4	4	2	2	2	2	2	2	2	2	2	2	2	2	2	2	2	2	2	2	2	2	2	2	2	2	2	2	2	2	2
Y533_136	27	61	44	81	53.5	67.25	27	36	31.5	27	36	31.5	1	1	1	1	1	1	1	1	1	1	1	1	1	1	1	1	1	1	1	1	1	1	1	1	1	1	1	1	1	1	1	1	1	1	1	1	1
Y533_135	33	79	56	39	36	37.5	27	36	31.5	27	72	49.5	4	4	4	4	4	4	4	4	4	4	4	4	4	4	4	4	4	4	4	4	4	4	4	4	4	4	4	4	4	4	4	4	4	4	4	4	4
Y533_134	67	137	102	69	108	88.5	217	147.5	182.25	201	158	179.5	2	2	2	2	2	2	2	2	2	2	2	2	2	2	2	2	2	2	2	2	2	2	2	2	2	2	2	2	2	2	2	2	2	2	4	4	4
Y533_133	124	140.5	132.25	22.5	68.5	45.5	135	36	85.5	82	36	59	3	3	3	3	3	3	3	3	4	4	4	4	4	4	4	4	4	4	4	4	4	4	3	4	3	3	3	1	3	1	1	1	1	1	1	1	1
Y533_132	40	93.5	66.75	108	93	100.5	73.5	68.5	71	27	36	31.5	2	2	2	2	2	2	1	1	1	1	1	1	1	1	1	1	1	1	1	1	1	1	1	1	1	1	1	1	1	1	1	1	1	1	1	1	1
Y533_131	199	162	180.5	130.5	143	136.75	240	190.5	215.25	211.5	104.5	158	4	4	4	4	4	4	4	4	4	4	4	4	4	4	4	4	4	4	4	4	4	4	4	4	4	4	4	4	4	4	4	4	4	4	4	4	4
Y533_130	164	129	146.5	48	36	42	83	72	77.5	132.5	72	102.25	2	2	2	2	2	2	2	2	2	2	2	2	2	2	2	2	2	2	2	2	2	2	2	2	2	2	2	2	2	2	2	2	2	2	2	2	2
Y533_129	175	104.5	139.75	27	72	49.5	163.5	144	153.75	156	104.5	130.25	2	2	2	2	2	2	2	2	2	2	2	2	2	2	2	2	2	2	2	2	2	2	2	2	2	2	2	2	2	2	2	2	2	2	2	2	2
Y533_128	178.5	118	148.25	87	100.5	93.75	63.5	61	62.25	111	36	73.5	1	1	1	1	1	1	1	1	1	1	1	1	1	1	1	1	2	2	2	2	2	2	2	2	2	2	2	2	2	2	2	2	2	2	2	2	2
Y533_125	167.5	111	139.25	94.5	104	99.25	30.5	61	45.75	27	36	31.5	3	3	3	3	3	3	3	3	3	3	3	3	3	3	3	3	3	3	3	3	3	3	1	3	1	1	1	1	1	1	1	1	1	1	1	1	1
Y533_124	27	93.5	60.25	63	36	49.5	27	68.5	47.75	27	36	31.5	1	1	1	1	1	1	1	1	1	1	1	1	1	1	3	3	3	3	3	3	3	3	3	3	3	3	3	3	3	3	3	3	3	3	3	3	3
Y533_123	111.5	93.5	102.5	105	107	106	63	68.5	65.75	27	36	31.5	1	1	1	1	1	1	1	1	1	1	1	1	1	1	1	1	1	1	1	1	1	1	1	1	1	1	1	1	1	1	1	1	1	1	1	1	1
Y533_122	41.5	86	63.75	34.5	36	35.25	27	36	31.5	27	36	31.5	3	3	3	3	3	3	3	3	3	3	3	3	3	3	3	3	3	3	3	3	3	3	3	3	3	3	3	3	3	3	3	3	3	3	3	3	3
Y533_121	225.5	147	186.25	96	71	83.5	240	230	235	228	269.5	248.75	3	3	3	3	3	3	3	3	3	3	3	3	3	3	3	3	3	3	3	3	3	3	3	3	3	3	3	3	3	3	3	3	3	3	3	3	3
Y533_120	215.5	101	158.25	69	89.5	79.25	225	108	166.5	160.5	108	134.25	4	4	4	4	4	4	4	4	4	4	4	4	4	4	4	4	4	4	4	4	4	4	4	4	4	4	4	4	4	4	4	4	4	4	4	4	4
Y533_119	30.5	53.5	42	27	36	31.5	27	36	31.5	27	36	31.5	3	3	3	3	3	3	3	3	3	3	3	3	3	3	3	3	3	3	3	3	3	3	3	3	3	1	1	1	1	1	1	1	1	1	1	1	1
Y533_117	173.5	108	140.75	83	68.5	75.75	151.5	79	115.25	156	72	114	1	1	1	1	1	1	1	1	1	1	1	1	1	1	1	1	1	1	1	1	1	1	1	1	1	1	1	1	1	1	1	1	1	1	1	1	1
Y533_116	53.5	68.5	61	27	36	31.5	27	NA	13.5803	27	NA	16.5464	3	3	3	3	3	3	3	3	3	3	3	3	3	3	3	3	3	3	3	3	3	3	3	3	3	3	3	3	3	3	3	3	3	3	1	1	1
Y533_115	77.5	100.5	89	27	36	31.5	27	61	44	66	36	51	3	3	3	3	3	3	3	3	3	3	3	3	3	3	3	3	1	1	1	1	1	1	1	1	1	1	1	1	1	1	1	1	1	1	1	1	1
Y533_114	73.5	97	85.25	27	53.5	40.25	27	97	62	27	47	37	2	2	2	2	2	2	2	2	2	2	2	2	2	2	2	2	2	2	2	2	2	2	2	2	2	2	2	2	2	2	2	2	2	2	2	2	2
Y533_112	27	78.5	52.75	27	36	31.5	27	36	31.5	27	36	31.5	2	2	2	2	2	2	2	2	2	2	2	2	2	2	2	2	2	2	2	2	2	2	2	2	2	2	2	2	2	2	2	2	2	2	2	2	2
Y533_111	70	79	74.5	127.5	107	117.25	27	36	31.5	27	36	31.5	3	3	3	3	3	3	3	3	4	4	4	4	4	4	4	4	2	2	2	2	2	2	2	2	2	2	2	2	2	2	2	2	2	2	2	2	2
Y533_098	155	NA	143.765	82.5	NA	81.79	45	NA	31.5803	27	NA	16.5464	2	2	2	2	2	2	2	2	2	2	2	4	4	4	4	4	4	4	4	4	4	4	4	4	4	4	4	4	4	4	4	4	4	4	4	4	4
Y533_096	57	53.5	55.25	27	36	31.5	27	68.5	47.75	27	72	49.5	1	1	1	1	1	1	1	1	1	1	1	1	1	1	1	1	2	2	2	2	2	2	4	2	4	4	4	4	4	4	4	4	4	4	4	4	4
Y533_095	121	93	107	34.5	68.5	51.5	75	36	55.5	69	36	52.5	3	3	3	3	3	3	3	3	1	1	1	1	1	1	1	1	1	1	1	1	1	1	1	1	1	1	1	1	1	1	1	1	1	1	1	1	1
Y533_094	192	140.5	166.25	160.5	68.5	114.5	181	68.5	124.75	184.5	68.5	126.5	4	4	4	4	4	4	4	4	3	3	3	3	3	3	3	3	3	3	3	3	3	3	3	3	3	3	3	3	3	3	3	3	3	3	3	3	3
Y533_093	45	133.5	89.25	51	36	43.5	63	36	49.5	63	36	49.5	2	2	2	2	2	2	2	2	2	2	2	2	2	2	4	4	4	4	4	4	4	4	4	4	4	4	4	4	4	4	4	4	4	4	4	4	4
Y533_092	27	68.5	47.75	27	36	31.5	27	36	31.5	27	36	31.5	4	4	4	4	4	4	4	4	4	4	4	4	4	4	4	4	4	4	4	4	4	4	4	4	4	4	4	4	4	4	4	4	4	4	4	4	4
Y533_091	55.5	72	63.75	27	36	31.5	27	75.5	51.25	27	68.5	47.75	4	4	4	4	4	4	4	4	3	3	3	3	3	3	3	3	3	3	3	3	3	3	3	3	3	3	3	3	3	3	3	3	3	3	3	3	3
Y533_090	224.5	140.5	182.5	93	36	64.5	231	219.5	225.25	234	212.5	223.25	1	1	1	1	1	1	1	1	2	2	2	2	2	2	2	2	2	2	2	2	2	2	2	2	2	2	2	2	2	2	2	2	2	2	2	2	2
Y533_089	202	86	144	51	68.5	59.75	220.5	176.5	198.5	223.5	180	201.75	2	2	2	2	2	2	2	2	2	2	2	2	2	2	2	4	4	4	4	4	4	4	4	4	4	4	4	4	4	4	4	4	4	4	4	4	4
Y533_087	27	36	31.5	27	17.5	22.25	27	36	31.5	27	36	31.5	4	4	4	4	4	4	4	4	4	4	4	4	4	4	4	4	4	4	4	4	4	4	4	4	4	4	4	4	4	4	4	4	4	4	4	4	4
Y533_086	106.5	50	78.25	79.5	36	57.75	225	36	130.5	111	36	73.5	4	4	4	4	4	4	2	2	2	2	2	2	2	2	2	2	2	2	2	2	2	2	2	2	2	2	2	2	2	2	2	2	2	2	2	2	2
Y533_085	109.5	97	103.25	126	183.5	154.75	168	50	109	90	68.5	79.25	1	1	1	1	1	1	1	1	1	1	1	1	1	1	1	1	1	1	1	1	1	1	1	1	1	1	1	1	1	1	1	1	1	1	1	1	1
Y533_084	132.5	79	105.75	80	93.5	86.75	144	96.5	120.25	153	104.5	128.75	4	4	2	2	2	2	2	2	2	2	2	2	2	2	2	2	2	2	2	2	2	2	2	2	2	2	2	2	2	2	2	2	2	2	2	2	2
Y533_082	38	79	58.5	34.5	61	47.75	27	36	31.5	27	72	49.5	1	1	1	1	1	1	1	1	1	1	1	1	1	1	1	1	1	1	1	1	1	1	1	1	1	1	1	1	1	1	1	1	1	1	1	1	1
Y533_081	73.5	72	72.75	45	36	40.5	27	NA	13.5803	27	NA	16.5464	2	2	2	2	2	2	2	2	2	2	2	2	2	2	2	2	2	2	2	2	2	2	2	2	2	2	2	2	2	2	2	2	2	2	2	2	2
Y533_080	171	NA	159.765	142	NA	141.29	NA	NA	NA	NA	NA	NA	2	2	2	2	2	2	2	2	2	2	2	2	2	2	2	2	2	2	2	2	2	2	2	2	2	2	2	2	2	2	2	2	2	2	2	2	2
Y533_079	NA	NA	NA	NA	NA	NA	NA	NA	NA	NA	NA	NA	2	2	2	2	2	2	2	2	2	2	2	2	2	2	2	2	2	2	2	2	2	2	2	2	2	2	2	2	2	2	2	2	2	2	2	2	2
Y533_078	174.5	79	126.75	63	36	49.5	183	180	181.5	162	108	135	2	2	2	2	2	2	2	2	2	2	2	2	2	2	2	2	4	4	4	4	4	4	4	4	4	4	4	4	4	4	4	4	4	4	4	4	4
Y533_077	177	89.5	133.25	84	36	60	148.5	79	113.75	148.5	72	110.25	2	2	2	2	2	2	2	2	1	1	1	1	1	1	1	1	1	1	1	1	1	1	3	1	3	3	3	3	3	3	3	3	3	3	3	3	3
Y533_076	210	79	144.5	73.5	43	58.25	231	108	169.5	120.5	108	114.25	1	1	1	1	1	1	1	1	1	1	1	1	1	1	1	1	1	2	2	2	2	2	2	2	2	2	2	2	2	2	2	2	2	2	2	2	2
Y533_074	105	72	88.5	55.5	36	45.75	93	36	64.5	27	36	31.5	4	4	4	4	4	4	4	4	4	4	4	4	4	4	4	4	4	4	4	4	4	4	4	4	4	4	4	4	4	4	4	4	4	4	4	4	4
Y533_073	171	75.5	123.25	105	61	83	164.5	43	103.75	149.5	61	105.25	1	1	1	1	1	1	1	1	1	1	1	1	1	1	1	1	1	1	1	1	1	1	1	1	1	1	1	3	3	3	3	3	3	3	3	3	3
Y533_072	55	79	67	52	72	62	54	36	45	27	36	31.5	4	4	4	4	4	4	4	4	4	4	4	4	4	4	4	4	4	4	4	4	4	4	4	4	4	4	4	4	4	4	4	4	4	4	4	4	4
Y519_199	79.5	61	70.25	27	36	31.5	27	36	31.5	30.5	36	33.25	3	3	3	3	3	3	3	3	3	3	3	3	3	3	3	3	3	3	3	3	3	3	3	3	1	1	1	1	1	1	1	1	1	1	1	1	1
Y519_198	192	89.5	140.75	127.5	79	103.25	151.5	115	133.25	180	140	160	2	2	2	2	2	2	2	2	2	2	2	2	2	2	2	2	2	2	2	2	2	2	2	2	2	2	2	2	2	2	2	2	2	2	2	2	2
Y519_196	59.5	61	60.25	27	36	31.5	27	36	31.5	27	36	31.5	1	1	1	1	1	1	1	1	3	3	3	3	3	3	3	3	3	3	3	3	3	3	3	3	3	3	3	3	3	3	3	3	3	3	3	3	3
Y519_193	231	122	176.5	219	122	170.5	231	103.5	167.25	234	128.5	181.25	2	2	2	2	2	2	2	2	2	2	2	2	2	2	2	2	2	2	2	2	2	2	2	2	2	2	2	2	2	2	2	2	2	2	2	2	2
Y519_192	231	132.5	181.75	187.5	115	151.25	237	NA	223.58	240	NA	229.546	3	3	3	3	3	4	4	4	4	4	4	4	4	4	4	4	4	4	4	4	4	4	4	4	4	4	4	4	4	4	4	4	4	4	4	4	4
Y519_191	231	108	169.5	145.5	96.5	121	237	108	172.5	240	151	195.5	2	2	2	2	2	2	2	2	2	2	2	2	2	2	2	2	2	2	2	2	2	2	2	2	2	2	2	2	2	2	2	2	2	2	2	2	2
Y519_189	234	NA	222.765	NA	NA	NA	NA	NA	NA	NA	NA	NA	1	1	1	1	1	1	1	1	1	1	1	1	1	1	1	1	1	1	1	1	1	1	1	1	1	1	1	1	1	1	1	1	1	1	1	1	1
Y519_188	237	147.5	192.25	229.5	118.5	174	237	147.5	192.25	243	180	211.5	2	2	2	2	2	2	2	2	2	2	2	2	2	2	2	2	2	2	2	2	2	2	2	2	2	2	2	2	2	2	2	2	2	2	2	2	2
Y519_186	222	96.5	159.25	154	68	111	222	36	129	240	36	138	2	2	2	2	2	2	2	2	2	2	2	2	2	2	2	2	2	2	2	2	2	2	4	2	4	4	4	4	4	4	4	4	4	4	4	4	4
Y519_185	228	118.5	173.25	115.5	82.5	99	143.5	115	129.25	237	186.5	211.75	4	4	4	4	4	4	4	4	4	4	4	4	4	4	4	4	4	4	4	4	4	4	4	4	4	4	4	4	4	4	4	4	4	4	4	4	4
Y519_184	243	86	164.5	125.5	71	98.25	240	86	163	243	71	157	3	3	3	3	3	3	3	3	3	3	3	1	1	1	1	1	1	1	1	1	1	1	1	1	1	1	1	1	1	1	1	1	1	1	1	1	1
Y519_183	NA	72	83.2346	NA	36	36.71	NA	36	49.4197	NA	36	46.4536	4	4	4	4	4	4	4	4	4	4	4	4	4	4	4	4	4	4	4	4	4	4	4	4	4	4	4	4	4	4	4	4	4	4	4	4	4
Y519_182	139.5	86	112.75	52	75.5	63.75	135	75.5	105.25	213	75.5	144.25	2	2	2	2	2	2	2	2	2	2	2	2	2	2	2	2	2	2	2	2	2	2	2	2	2	2	2	2	2	2	2	2	2	2	2	2	2
Y519_177	82.5	68.5	75.5	72	72	72	27	36	31.5	27	36	31.5	4	4	4	4	4	4	4	4	4	4	4	4	4	4	4	4	4	4	4	4	4	4	4	4	4	4	4	4	4	4	4	4	4	4	4	4	4
Y519_176	81	36	58.5	60.5	36	48.25	27	36	31.5	27	36	31.5	1	1	1	1	1	1	1	1	1	1	1	1	1	1	1	1	1	1	1	1	1	1	1	1	1	1	1	1	1	1	1	1	1	1	1	1	1
Y519_174	62.5	79	70.75	99	111.5	105.25	27	36	31.5	27	36	31.5	3	3	3	3	3	3	3	3	3	3	3	3	3	3	3	3	3	3	3	3	3	3	3	3	3	3	3	3	3	3	3	3	3	3	3	3	3
Y519_173	243	61	152	NA	53.5	54.21	NA	NA	NA	NA	NA	NA	3	3	3	3	3	3	3	3	3	3	3	3	3	3	3	3	3	3	3	3	3	3	3	3	3	3	3	3	3	3	3	3	3	3	3	3	3
Y519_171	142.5	36	89.25	41	36	38.5	27	NA	13.5803	27	NA	16.5464	1	1	1	1	1	1	1	1	1	1	1	1	1	1	1	1	1	1	1	1	1	1	1	1	1	1	1	1	1	1	1	1	1	1	1	1	1
Y519_170	41.5	68.5	55	27	104.5	65.75	27	72	49.5	27	72	49.5	2	2	2	2	2	2	2	2	2	2	2	2	2	2	2	2	2	2	2	2	2	2	2	2	2	2	2	2	2	2	2	2	2	2	2	2	2
Y519_168	39	53.5	46.25	27	36	31.5	27	36	31.5	27	36	31.5	3	3	3	3	3	3	3	3	3	3	1	1	1	1	1	1	1	1	1	1	1	1	1	1	1	1	1	1	1	1	1	1	1	1	1	1	1
Y519_167	33	36	34.5	45	36	40.5	34.5	36	35.25	27	36	31.5	1	1	1	1	1	1	1	1	1	1	1	1	1	1	1	1	1	1	1	1	1	1	1	1	1	1	1	1	1	1	1	1	1	1	1	1	1
Y519_166	34.5	53.5	44	45	53.5	49.25	27	36	31.5	27	36	31.5	3	3	3	3	3	4	4	4	4	4	4	4	4	4	4	4	2	2	2	2	2	2	2	2	2	2	2	2	2	2	2	2	2	2	2	2	2
Y519_165	95	96.5	95.75	52.5	60.5	56.5	135	NA	121.58	117	NA	106.546	3	3	3	3	3	3	3	3	3	3	3	3	3	3	3	3	3	3	3	3	3	3	3	3	3	3	3	3	3	3	3	3	3	3	1	1	1
Y519_164	30	53.5	41.75	27	53.5	40.25	27	36	31.5	27	50	38.5	4	3	3	3	3	3	3	3	1	1	1	1	1	1	1	1	1	1	1	1	1	1	1	1	1	1	1	1	1	1	1	1	1	1	1	1	1
Y519_162	85	53.5	69.25	99	86	92.5	30.5	36	33.25	27	36	31.5	4	4	4	4	4	4	4	4	4	4	4	4	4	4	4	4	4	4	4	4	4	4	4	4	4	4	4	4	4	4	4	4	4	4	4	4	4
Y519_161	160.5	72	116.25	129	79	104	99	36	67.5	27	36	31.5	4	4	4	4	4	4	4	4	4	4	4	4	4	4	4	4	4	4	4	4	4	4	4	4	4	4	4	4	4	4	4	4	4	4	4	4	4
Y519_159	37.5	68	52.75	27	43	35	27	36	31.5	27	36	31.5	3	3	3	3	3	3	3	3	3	3	3	3	3	3	3	3	3	3	3	3	3	3	3	3	3	3	3	3	3	3	3	3	3	3	1	1	1
Y519_155	27	36	31.5	33	36	34.5	45	36	40.5	27	28.5	27.75	4	4	4	4	4	4	4	4	4	4	4	3	3	3	3	3	1	1	1	1	1	1	1	1	1	1	1	1	1	1	1	1	1	1	1	1	1
Y519_154	41.5	36	38.75	81	36	58.5	55.5	NA	42.0803	27	NA	16.5464	2	2	2	2	2	2	2	2	2	2	2	2	1	1	1	1	1	1	1	1	1	1	1	1	1	1	1	1	1	1	1	1	1	1	1	1	1
Y519_153	58.5	67.5	63	117.5	103	110.25	42	NA	28.5803	27	NA	16.5464	2	2	2	2	2	2	2	2	2	2	2	2	2	2	2	2	2	2	2	2	2	2	2	2	2	2	2	2	2	2	2	2	2	2	2	2	2
Y519_152	27	36	31.5	27	36	31.5	27	36	31.5	27	36	31.5	1	1	1	1	1	1	1	1	1	1	1	1	1	1	1	1	1	1	1	1	1	1	2	2	2	2	2	2	2	2	2	2	2	2	2	2	2
Y519_150	59.5	53.5	56.5	45	103.5	74.25	27	43	35	27	36	31.5	2	2	2	2	2	2	2	2	2	2	2	4	4	4	4	4	4	4	4	4	4	4	4	4	4	4	4	4	4	4	4	4	4	4	4	4	4
Y519_149	129	NA	117.765	NA	NA	NA	NA	NA	NA	NA	NA	NA	4	4	4	4	4	4	4	4	4	4	4	4	4	4	4	4	4	4	4	4	4	4	4	4	4	4	4	4	4	4	4	4	4	4	4	4	4
Y519_148	48.5	36	42.25	45	36	40.5	27	36	31.5	27	36	31.5	4	4	4	4	4	4	4	4	4	4	4	4	4	4	4	4	4	4	4	4	4	4	4	4	4	4	4	4	4	4	4	4	4	4	4	4	4
Y519_147	27	36	31.5	NA	36	36.71	NA	36	49.4197	NA	36	46.4536	1	1	1	1	1	1	1	1	1	1	1	1	1	1	1	1	1	1	1	1	1	1	1	1	1	1	1	1	1	1	1	1	1	1	1	1	1
Y519_146	27	36	31.5	27	36	31.5	27	36	31.5	27	36	31.5	4	4	4	4	4	4	4	4	4	4	4	4	4	4	4	4	4	4	4	4	4	4	4	4	4	4	4	4	4	4	4	4	4	4	4	4	4
Y519_144	27	36	31.5	27	36	31.5	27	36	31.5	27	36	31.5	1	1	1	1	1	1	1	1	1	1	1	1	1	1	1	1	1	1	1	1	1	1	1	1	1	1	1	1	1	1	1	1	1	1	1	1	1
Y519_143	27	36	31.5	63	36	49.5	27	36	31.5	27	36	31.5	2	2	2	2	2	2	2	2	2	2	2	2	2	2	2	2	1	1	1	1	1	1	1	1	1	1	1	1	1	1	1	1	1	1	1	1	1
Y519_141	27	68.5	47.75	27	36	31.5	45	36	40.5	27	36	31.5	1	1	1	1	1	1	1	1	1	1	1	1	1	1	1	1	1	1	1	1	1	1	1	1	1	1	1	1	1	1	1	1	1	1	1	1	1
Y519_140	27	36	31.5	27	36	31.5	30.5	36	33.25	27	43	35	2	2	2	2	2	2	2	2	2	2	2	2	2	2	2	2	2	2	2	2	2	2	2	2	2	2	2	2	2	2	2	2	2	2	2	2	2
Y519_139	128	61	94.5	151.5	86	118.75	27	36	31.5	27	36	31.5	2	2	2	2	2	2	2	2	2	2	2	2	2	2	2	2	2	2	2	2	2	2	2	2	2	2	2	2	2	2	2	2	2	2	2	2	2
Y519_138	27	36	31.5	27	36	31.5	27	36	31.5	27	36	31.5	4	4	4	4	4	4	4	4	4	4	4	4	4	4	4	4	4	4	4	4	4	4	4	4	4	4	4	4	4	4	4	4	4	4	4	4	4
Y519_137	27	36	31.5	27	36	31.5	27	NA	13.5803	27	NA	16.5464	1	2	2	2	2	2	2	2	2	2	2	2	2	2	2	2	2	2	2	2	2	2	2	2	2	2	2	2	2	2	2	2	2	2	2	2	2
Y519_135	27	36	31.5	27	36	31.5	27	36	31.5	27	36	31.5	2	2	2	2	2	2	2	2	2	2	2	2	2	2	2	2	2	2	2	2	2	2	2	2	2	2	2	2	2	2	2	2	2	2	2	2	2
Y519_134	34.5	36	35.25	15	36	25.5	15	NA	1.58032	15	NA	4.54638	1	1	1	1	1	1	1	1	1	1	1	1	1	1	1	1	1	1	1	1	1	1	1	1	1	1	1	1	1	1	1	1	1	1	1	1	1
Y519_133	78	72	75	93	86	89.5	61.5	36	48.75	27	36	31.5	3	4	4	4	4	4	4	4	4	4	4	4	4	4	4	4	4	4	4	4	4	4	4	4	4	4	4	4	4	4	4	4	4	4	4	4	4
Y519_132	47.5	36	41.75	55.5	36	45.75	45	36	40.5	27	36	31.5	3	3	3	3	3	3	3	3	3	3	3	3	3	3	3	3	3	3	3	3	3	3	3	3	3	3	3	3	3	3	3	3	3	3	3	3	3
Y516_088	139	NA	127.765	66.5	NA	65.79	45	NA	31.5803	27	NA	16.5464	3	4	4	4	4	4	4	4	4	4	4	4	4	4	4	4	4	4	4	4	4	4	4	4	4	4	4	4	4	4	4	4	4	4	4	4	4
Y516_087	37.5	36	36.75	27	36	31.5	27	36	31.5	27	36	31.5	4	4	4	4	4	4	4	4	4	4	4	4	4	4	4	4	4	4	4	4	4	4	4	4	4	4	4	4	4	4	4	4	4	4	4	4	4
Y516_080	237	180	208.5	207	93	150	225	194	209.5	237	194	215.5	3	3	3	3	3	3	3	3	3	3	3	3	3	4	4	4	4	4	4	4	4	4	4	4	2	2	2	2	2	2	2	2	2	2	2	2	2
Y516_078	228	252	240	99	104	101.5	225	144	184.5	198.5	79	138.75	3	3	3	3	3	3	3	3	3	3	3	3	3	3	3	3	3	3	3	3	3	3	3	3	3	3	3	3	3	3	3	3	3	3	3	3	3
Y516_020	27	72	49.5	30.5	61	45.75	27	36	31.5	27	36	31.5	1	1	1	1	1	1	1	1	1	1	1	1	1	1	1	1	3	3	3	3	3	3	3	3	3	3	3	3	3	3	3	3	3	3	3	3	3
Y515_086	27	36	31.5	27	36	31.5	27	36	31.5	27	36	31.5	1	1	1	1	1	1	1	1	1	1	1	2	2	2	2	2	2	2	2	2	2	2	2	2	2	2	2	2	2	2	2	2	2	2	2	2	2
Y515_021	30	89.5	59.75	27	108	67.5	27	36	31.5	27	36	31.5	1	1	1	1	1	1	1	1	1	1	1	1	1	1	1	1	1	2	1	2	2	2	2	2	2	2	2	2	2	2	2	2	2	2	2	2	2
Y316_090a	42	72	57	33	72	52.5	27	72	49.5	33	72	52.5	1	1	1	1	1	1	1	1	1	1	1	1	1	1	1	1	1	1	1	1	1	1	1	1	1	1	1	1	1	1	1	1	1	1	1	1	1
Y316_088a	27	86	56.5	73.5	122	97.75	27	72	49.5	27	72	49.5	2	2	2	2	2	2	2	2	2	2	2	2	2	2	2	2	2	2	2	2	2	2	2	2	2	2	2	2	2	2	2	2	2	2	2	2	2
Y312_099	123	158	140.5	51	108	79.5	33	43	38	27	36	31.5	1	1	1	1	1	1	1	1	1	1	1	1	1	1	1	1	1	1	1	1	1	1	1	1	1	1	1	1	1	1	1	1	1	1	1	1	1
Y312_097	228	288	258	81.5	115	98.25	228	216	222	182.5	216	199.25	3	3	3	3	3	3	3	3	3	3	3	1	1	1	1	1	1	1	1	1	1	1	1	1	1	1	1	1	1	1	1	1	1	1	1	1	1
Y312_096	102	216	159	36	144	90	99	216	157.5	84	216	150	2	2	2	2	2	2	2	2	2	2	2	2	2	2	2	2	2	2	2	2	2	2	2	2	2	2	2	2	2	2	2	2	2	2	2	2	2
Y312_093	34.5	72	53.25	27	43	35	34	36	35	27	36	31.5	4	4	4	4	4	4	4	4	4	4	4	4	4	4	4	4	4	4	4	4	4	4	4	4	4	4	4	4	4	3	3	3	3	3	3	3	3
Y312_091	45	122	83.5	109.5	154	131.75	45	61	53	27	61	44	3	3	3	3	3	3	3	3	3	3	3	3	3	3	3	3	3	3	3	3	3	3	1	3	1	1	1	1	1	1	1	1	1	1	1	1	1
Y312_089	45	72	58.5	33	108	70.5	50.5	72	61.25	39	72	55.5	3	3	3	3	3	3	3	3	3	3	3	3	3	3	3	3	3	3	3	3	3	3	3	3	3	3	3	3	3	3	3	3	3	3	3	3	3
Y312_088	166	72	119	33	72	52.5	129	118.5	123.75	86	108	97	2	2	2	2	2	2	2	2	4	4	4	4	4	4	4	4	4	4	4	4	4	4	4	4	4	4	4	4	4	4	4	4	4	4	4	4	4
Y312_085	66.5	36	51.25	37	36	36.5	30	NA	16.5803	27	NA	16.5464	4	4	4	4	4	4	4	4	4	4	4	4	4	4	4	4	4	4	4	4	4	4	4	4	4	4	4	4	4	4	4	4	4	4	4	4	4
Y312_084	39	72	55.5	33	36	34.5	34.5	36	35.25	27	36	31.5	4	4	4	4	4	4	4	4	4	4	4	4	4	4	4	4	4	4	4	4	4	4	4	4	4	4	4	4	4	4	4	4	4	4	4	4	4
Y312_080	85	72	78.5	27	36	31.5	45	36	40.5	27	43	35	2	2	2	2	2	2	2	2	2	2	2	2	2	2	2	2	2	2	2	2	2	2	2	2	2	2	2	2	2	2	2	2	2	2	2	2	2
Y312_073	107.5	72	89.75	75	104.5	89.75	27	79	53	45	43	44	3	3	3	3	3	3	3	3	3	3	3	3	3	3	3	3	3	3	3	3	3	3	3	3	3	3	3	3	3	3	3	3	3	3	3	3	3
Y312_071	74	72	73	55.5	104.5	80	27	36	31.5	27	43	35	3	3	3	3	3	3	3	3	3	3	3	3	3	3	3	3	3	3	3	3	3	3	3	3	1	1	1	1	1	1	1	1	1	1	1	1	1
Y312_069	195	144	169.5	117	72	94.5	132.5	79	105.75	78	79	78.5	3	3	3	3	3	3	3	3	1	1	1	1	1	1	1	1	1	1	1	1	1	1	1	1	1	1	1	1	1	1	1	1	1	1	1	1	1
Y312_066	77	72	74.5	81	79	80	73.5	75.5	74.5	63	43	53	2	2	2	2	2	2	2	2	2	2	2	2	2	2	2	2	2	2	2	2	2	2	2	2	2	2	2	2	2	2	2	2	2	2	2	2	2
Y312_064	50	72	61	51	36	43.5	103.5	61	82.25	73.5	72	72.75	1	1	1	1	1	1	1	1	1	1	1	1	1	1	1	1	1	1	1	1	1	1	1	1	1	1	1	1	1	1	1	1	1	1	1	1	1
Y312_062	77	96.5	86.75	27	115	71	NA	43	56.4197	NA	43	53.4536	3	3	3	3	3	3	3	3	3	3	3	3	3	3	3	3	3	3	3	3	3	3	3	3	3	3	3	3	3	3	3	3	3	3	3	3	3
Y312_059	77	89.5	83.25	78	89.5	83.75	27	43	35	27	43	35	4	4	4	4	4	4	4	4	4	4	4	4	4	4	4	4	4	4	4	4	4	4	4	4	4	4	4	4	4	4	4	4	4	4	2	2	2
Y312_058	77.5	121	99.25	151.5	168.5	160	27	43	35	27	79	53	2	2	2	2	2	2	2	2	2	2	2	2	2	2	2	2	2	2	2	2	2	2	2	2	2	2	2	2	2	2	2	2	2	2	2	2	2
Y312_057	41.5	36	38.75	112	68.5	90.25	27	36	31.5	27	36	31.5	4	4	4	4	4	4	4	4	4	4	4	4	4	4	4	4	4	2	2	2	2	2	2	2	2	2	2	2	2	2	2	2	2	2	2	2	2
Y312_055	130	96.5	113.25	88.5	187	137.75	48.5	75.5	62	73.5	43	58.25	1	1	1	1	1	1	1	1	1	1	1	1	1	1	1	1	1	1	1	1	1	1	1	1	1	1	1	1	1	1	1	1	1	1	1	1	1
Y312_054	64	72	68	33	72	52.5	30.5	36	33.25	27	36	31.5	3	3	3	3	3	3	3	3	3	3	3	3	3	3	3	3	3	3	3	3	3	3	3	3	3	3	3	3	3	3	3	3	3	3	3	3	3
Y312_052	36.5	36	36.25	27	36	31.5	27	36	31.5	27	36	31.5	4	4	4	4	4	4	4	4	4	4	4	4	4	4	4	4	4	4	4	4	4	4	4	4	4	4	4	4	4	4	4	4	4	4	4	4	4
Y312_051	58	36	47	51	36	43.5	61.5	36	48.75	27	36	31.5	3	3	3	3	3	3	3	3	3	3	3	3	3	3	3	3	3	3	3	3	3	3	3	3	3	3	3	3	3	3	3	3	3	3	3	3	3
Y312_047	41.5	115	78.25	45	68	56.5	27	36	31.5	27	43	35	2	2	2	2	2	2	2	2	2	2	2	2	2	2	2	2	2	2	2	2	2	2	4	2	4	4	4	4	4	4	4	4	4	4	4	4	4
Y312_045	128	97	112.5	51	36	43.5	45	36	40.5	63	36	49.5	1	1	1	1	1	1	1	1	1	1	1	1	1	1	1	1	1	1	1	1	1	1	1	1	1	1	1	1	1	1	1	1	1	1	1	1	1
Y312_043	92	72	82	27	53.5	40.25	52.5	72	62.25	27	108	67.5	3	3	3	3	3	3	3	3	3	3	3	3	3	3	3	3	3	3	3	3	3	3	3	3	3	3	3	3	3	3	3	3	3	3	3	3	3
Y312_038	161	72	116.5	48.5	36	42.25	51	68.5	59.75	69	72	70.5	1	1	1	1	1	1	1	1	1	1	1	1	1	1	1	1	1	1	1	1	1	1	1	1	1	1	1	1	1	1	1	1	1	1	1	1	1
Y312_037	185.5	114.5	150	213	179	196	38	72	55	27	53.5	40.25	4	4	4	4	4	4	4	4	4	3	3	3	3	3	3	3	3	3	3	3	3	3	3	3	3	3	3	3	3	3	3	3	3	3	1	1	1
Y312_035	128	61	94.5	67.5	97	82.25	67.5	68.5	68	87	36	61.5	1	1	1	1	1	1	1	1	1	1	1	1	1	1	1	1	1	1	1	1	1	1	1	1	1	1	1	1	1	1	1	1	1	1	1	1	1
Y312_034	41.5	36	38.75	45	36	40.5	30.5	36	33.25	27	36	31.5	4	4	4	4	4	4	4	4	4	4	4	4	4	4	4	4	4	4	4	4	4	4	4	4	4	4	4	4	4	4	4	4	4	4	4	4	4
Y312_033	27	72	49.5	27	36	31.5	30.5	36	33.25	27	36	31.5	3	3	3	3	3	3	3	3	3	3	3	3	3	3	3	3	3	3	3	3	3	3	1	3	1	1	1	1	1	1	1	1	1	1	1	1	1
Y312_024	164.5	108	136.25	42	36	39	27	36	31.5	27	36	31.5	2	2	2	2	2	2	2	2	2	2	2	2	2	2	2	2	2	2	2	2	2	2	2	2	2	2	2	2	2	2	2	2	2	2	2	2	2
Y312_020	166.5	92.5	129.5	162.5	183.5	173	75	71	73	105	53.5	79.25	4	4	2	2	2	2	2	2	2	2	2	2	2	2	2	2	2	2	2	2	2	2	2	2	2	2	2	2	2	2	2	2	2	2	2	2	2
Y312_018	27	72	49.5	27	36	31.5	27	36	31.5	27	72	49.5	1	1	3	3	3	3	3	3	3	3	3	3	3	3	3	3	3	3	3	3	3	3	3	3	3	3	3	3	3	3	3	3	3	3	3	3	3
Y312_016	70.5	97	83.75	30.5	36	33.25	54.5	36	45.25	27	36	31.5	3	3	3	3	3	3	3	3	3	4	2	2	2	2	2	2	2	2	2	2	2	2	2	2	2	2	2	2	2	2	2	2	2	2	2	2	2
Y312_014	52	36	44	45	36	40.5	27	36	31.5	27	36	31.5	4	4	4	4	4	4	4	4	4	4	4	4	4	4	4	4	4	4	4	4	4	4	2	4	2	2	2	2	2	2	2	2	2	2	2	2	2
Y312_013	56	72	64	51	43	47	27	36	31.5	27	36	31.5	1	1	1	1	1	1	1	1	1	1	1	1	1	1	1	1	1	1	1	1	1	1	1	1	1	1	1	1	1	1	1	1	1	1	1	1	1
Y312_011	147	61	104	124	101	112.5	67.5	36	51.75	27	36	31.5	1	1	1	1	1	1	1	1	1	1	1	1	1	1	1	1	1	1	1	1	1	1	1	1	1	1	1	1	1	1	1	1	1	1	1	1	1
Y312_009	86	68	77	114.5	187	150.75	33	36	34.5	27	36	31.5	1	1	1	1	1	1	1	1	1	1	1	1	1	1	1	1	1	1	1	1	1	1	1	1	1	1	1	1	1	1	1	1	1	1	1	1	1
Y312_008	30.5	72	51.25	51	72	61.5	27	36	31.5	27	36	31.5	3	3	3	3	3	3	3	3	3	3	3	3	3	3	3	3	3	3	3	3	3	3	3	3	3	3	3	3	3	3	3	3	3	3	3	3	3
Y312_005	45	115	80	27	93	60	45	36	40.5	27	36	31.5	2	2	2	2	2	2	2	2	2	2	2	2	2	2	2	2	2	2	2	2	2	2	2	2	2	2	2	2	2	2	2	2	2	2	2	2	2
Y312_004	53.5	72	62.75	51	72	61.5	34	36	35	27	36	31.5	3	3	3	3	3	3	3	3	3	3	3	3	3	1	1	1	1	1	1	1	1	1	1	1	1	1	1	1	1	1	1	1	1	1	1	1	1
Y312_003	48.5	72	60.25	69	72	70.5	30.5	36	33.25	27	36	31.5	1	1	1	1	1	1	1	1	1	1	1	1	1	1	1	1	1	1	1	1	1	1	1	1	1	1	1	1	1	1	1	1	1	1	1	1	1
Y312_002	110	97	103.5	110	176	143	30.5	101	65.75	27	53.5	40.25	3	3	3	3	3	3	3	3	3	3	3	3	3	3	3	3	3	3	3	3	3	3	3	3	3	3	3	3	3	3	3	3	3	3	3	3	3
Y219_050	104.5	NA	93.2654	105	NA	104.29	21	NA	7.58032	21	NA	10.5464	2	2	2	2	2	2	2	2	2	2	2	2	2	2	2	2	2	2	2	2	2	2	2	2	2	2	2	2	2	2	2	2	2	2	2	2	2
Y219_046	117	NA	105.765	77.5	NA	76.79	45	NA	31.5803	27	NA	16.5464	1	1	1	1	2	2	2	2	2	2	2	2	2	2	2	2	2	2	2	2	2	2	2	2	2	2	2	2	2	2	2	2	2	2	2	2	4
Y219_042	86	NA	74.7654	141	NA	140.29	57	NA	43.5803	27	NA	16.5464	3	3	3	3	3	3	3	3	3	3	3	3	3	3	3	3	3	3	3	3	3	3	3	3	3	3	3	3	3	3	3	3	3	3	3	3	3
07_3509_99	NA	NA	NA	NA	NA	NA	NA	NA	NA	NA	NA	NA	2	2	2	2	2	2	2	2	2	2	2	2	2	2	2	2	2	2	2	2	2	2	2	2	2	2	2	2	2	2	2	2	2	2	2	2	2
07_3509_95	NA	NA	NA	NA	NA	NA	NA	NA	NA	NA	NA	NA	1	1	3	3	3	3	3	3	3	3	3	3	3	3	3	3	4	4	4	4	4	4	4	4	4	4	4	4	4	4	4	4	4	4	4	4	4
07_3509_9	NA	NA	NA	NA	NA	NA	NA	NA	NA	NA	NA	NA	2	2	2	2	2	2	2	2	1	1	1	1	1	1	1	1	1	1	1	1	1	1	3	1	3	3	3	3	3	3	3	3	3	3	3	3	3
07_3509_89	NA	NA	NA	NA	NA	NA	NA	NA	NA	NA	NA	NA	1	1	1	1	1	1	1	1	1	1	1	1	1	1	1	1	1	1	1	1	1	1	1	1	1	1	1	1	1	1	1	1	1	1	1	1	1
07_3509_88	NA	NA	NA	NA	NA	NA	NA	NA	NA	NA	NA	NA	4	4	4	4	4	4	4	4	4	4	4	4	4	4	4	4	4	4	4	4	4	4	4	4	4	4	4	4	4	4	4	4	4	4	4	4	4
07_3509_87	NA	NA	NA	NA	NA	NA	NA	NA	NA	NA	NA	NA	2	2	2	2	2	2	2	2	2	2	2	2	2	2	2	2	2	2	2	2	2	2	2	2	4	4	4	4	4	4	4	4	4	4	4	4	4
07_3509_86	NA	NA	NA	NA	NA	NA	NA	NA	NA	NA	NA	NA	3	3	3	3	3	3	3	3	3	3	3	3	3	3	3	3	3	3	3	3	3	3	3	3	3	3	3	3	3	3	3	3	3	3	3	3	3
07_3509_83	NA	NA	NA	NA	NA	NA	NA	NA	NA	NA	NA	NA	4	4	4	4	4	4	4	4	4	4	4	4	4	4	4	4	4	4	4	4	4	4	4	4	4	4	4	4	4	4	4	4	4	4	4	4	4
07_3509_74	NA	NA	NA	NA	NA	NA	NA	NA	NA	NA	NA	NA	1	1	3	3	3	3	3	3	3	3	3	3	3	3	3	3	3	3	3	3	3	3	3	3	3	3	3	3	3	3	3	3	3	3	3	3	3
07_3509_70	NA	NA	NA	NA	NA	NA	NA	NA	NA	NA	NA	NA	1	1	1	1	1	1	1	1	1	1	1	1	1	1	1	1	1	1	1	1	1	1	1	1	1	1	1	1	1	1	1	1	1	1	1	1	1
07_3509_68	NA	NA	NA	NA	NA	NA	NA	NA	NA	NA	NA	NA	2	2	2	2	2	2	2	2	2	2	2	2	2	2	2	2	2	2	2	2	2	2	2	2	2	2	2	2	2	2	2	2	2	2	4	4	4
07_3509_66	NA	NA	NA	NA	NA	NA	NA	NA	NA	NA	NA	NA	2	2	2	2	2	2	1	1	1	1	1	1	1	1	1	1	1	1	1	1	1	1	1	1	1	1	1	1	1	1	1	1	1	1	1	1	1
07_3509_65	NA	NA	NA	NA	NA	NA	NA	NA	NA	NA	NA	NA	4	4	4	4	4	4	4	4	4	4	4	4	4	4	4	4	4	4	4	4	4	4	4	4	4	4	4	4	4	4	4	4	4	4	4	4	4
07_3509_64	NA	NA	NA	NA	NA	NA	NA	NA	NA	NA	NA	NA	2	2	2	2	2	2	2	2	2	2	2	2	2	2	2	2	2	2	2	2	2	2	2	2	2	2	2	2	2	2	2	2	2	2	2	2	2
07_3509_62	NA	NA	NA	NA	NA	NA	NA	NA	NA	NA	NA	NA	1	1	1	1	1	1	1	1	1	1	1	1	1	1	1	1	2	2	2	2	2	2	2	2	2	2	2	2	2	2	2	2	2	2	2	2	2
07_3509_58	NA	NA	NA	NA	NA	NA	NA	NA	NA	NA	NA	NA	1	1	1	1	1	1	1	1	1	1	1	1	1	1	3	3	3	3	3	3	3	3	3	3	3	3	3	3	3	3	3	3	3	3	3	3	3
07_3509_55	NA	NA	NA	NA	NA	NA	NA	NA	NA	NA	NA	NA	3	3	3	3	3	3	3	3	3	3	3	3	3	3	3	3	3	3	3	3	3	3	3	3	3	3	3	3	3	3	3	3	3	3	3	3	3
07_3509_51	NA	NA	NA	NA	NA	NA	NA	NA	NA	NA	NA	NA	3	3	3	3	3	3	3	3	3	3	3	3	3	3	3	3	3	3	3	3	3	3	3	3	3	1	1	1	1	1	1	1	1	1	1	1	1
07_3509_48	NA	NA	NA	NA	NA	NA	NA	NA	NA	NA	NA	NA	4	4	4	4	4	4	4	4	4	4	4	4	4	4	4	4	4	4	4	4	4	4	4	4	4	4	4	4	4	4	4	4	4	4	4	4	4
07_3509_46	NA	NA	NA	NA	NA	NA	NA	NA	NA	NA	NA	NA	1	1	1	1	1	1	1	1	1	1	1	1	1	1	1	1	1	1	1	1	1	1	1	1	1	1	1	1	1	1	1	1	1	1	1	1	1
07_3509_44	NA	NA	NA	NA	NA	NA	NA	NA	NA	NA	NA	NA	3	3	3	3	3	3	3	3	3	3	3	3	3	3	3	3	3	3	3	3	3	3	3	3	3	3	3	3	3	3	3	3	3	3	1	1	1
07_3509_43	NA	NA	NA	NA	NA	NA	NA	NA	NA	NA	NA	NA	3	3	3	3	3	3	3	3	3	3	3	3	3	3	3	3	1	1	1	1	1	1	1	1	1	1	1	1	1	1	1	1	1	1	1	1	1
07_3509_42	NA	NA	NA	NA	NA	NA	NA	NA	NA	NA	NA	NA	2	2	2	2	2	2	2	2	2	2	2	2	2	2	2	2	2	2	2	2	2	2	2	2	2	2	2	2	2	2	2	2	2	2	2	2	2
07_3509_39	NA	NA	NA	NA	NA	NA	NA	NA	NA	NA	NA	NA	3	3	3	3	3	3	3	3	4	4	4	4	4	4	4	4	2	2	2	2	2	2	2	2	2	2	2	2	2	2	2	2	2	2	2	2	2
07_3509_35	NA	NA	NA	NA	NA	NA	NA	NA	NA	NA	NA	NA	3	3	3	3	3	3	3	3	1	1	1	1	1	1	1	1	1	1	1	1	1	1	1	1	1	1	1	1	1	1	1	1	1	1	1	1	1
07_3509_33	NA	NA	NA	NA	NA	NA	NA	NA	NA	NA	NA	NA	2	2	2	2	2	2	2	2	2	2	2	2	2	2	4	4	4	4	4	4	4	4	4	4	4	4	4	4	4	4	4	4	4	4	4	4	4
07_3509_32	NA	NA	NA	NA	NA	NA	NA	NA	NA	NA	NA	NA	4	4	4	4	4	4	4	4	4	4	4	4	4	4	4	4	4	4	4	4	4	4	4	4	4	4	4	4	4	4	4	4	4	4	4	4	4
07_3509_30	NA	NA	NA	NA	NA	NA	NA	NA	NA	NA	NA	NA	1	1	1	1	1	1	1	1	2	2	2	2	2	2	2	2	2	2	2	2	2	2	2	2	2	2	2	2	2	2	2	2	2	2	2	2	2
07_3509_29	NA	NA	NA	NA	NA	NA	NA	NA	NA	NA	NA	NA	2	2	2	2	2	2	2	2	2	2	2	2	2	2	2	2	2	4	4	4	4	4	4	4	4	4	4	4	4	4	4	4	4	4	4	4	4
07_3509_28	NA	NA	NA	NA	NA	NA	NA	NA	NA	NA	NA	NA	4	4	4	4	4	4	4	4	4	4	4	4	4	4	4	4	4	4	4	4	4	4	4	4	4	4	4	4	4	4	4	4	4	4	4	4	4
07_3509_25	NA	NA	NA	NA	NA	NA	NA	NA	NA	NA	NA	NA	4	4	4	4	4	4	2	2	2	2	2	2	2	2	2	2	2	2	2	2	2	2	2	2	2	2	2	2	2	2	2	2	2	2	2	2	2
07_3509_219	NA	NA	NA	NA	NA	NA	NA	NA	NA	NA	NA	NA	4	4	4	4	4	4	2	2	1	1	1	1	1	1	1	1	1	1	1	1	1	1	1	1	1	1	1	1	1	1	1	1	1	1	1	1	1
07_3509_218	NA	NA	NA	NA	NA	NA	NA	NA	NA	NA	NA	NA	4	4	4	4	4	4	4	4	4	4	4	4	4	4	4	4	4	4	4	4	4	4	4	4	4	4	4	4	4	4	4	4	4	4	4	4	4
07_3509_213	NA	NA	NA	NA	NA	NA	NA	NA	NA	NA	NA	NA	4	4	4	4	4	4	4	4	4	4	4	4	4	4	4	4	4	4	4	4	4	4	4	4	4	4	4	4	4	4	4	4	4	4	4	4	4
07_3509_212	NA	NA	NA	NA	NA	NA	NA	NA	NA	NA	NA	NA	3	3	3	3	3	3	3	3	3	3	3	3	3	1	1	1	1	1	1	1	1	1	1	1	1	1	1	1	1	1	1	1	1	1	1	1	1
07_3509_21	NA	NA	NA	NA	NA	NA	NA	NA	NA	NA	NA	NA	4	4	2	2	2	2	2	2	2	2	2	2	2	2	2	2	2	2	2	2	2	2	2	2	2	2	2	2	2	2	2	2	2	2	2	2	2
07_3509_206	NA	NA	NA	NA	NA	NA	NA	NA	NA	NA	NA	NA	1	1	1	1	1	1	2	2	2	2	2	2	2	2	2	2	2	2	2	2	2	2	2	2	2	2	2	2	2	2	2	2	2	2	2	2	2
07_3509_205	NA	NA	NA	NA	NA	NA	NA	NA	NA	NA	NA	NA	3	3	3	3	3	3	3	3	3	3	3	3	3	3	3	3	3	3	3	3	3	3	1	3	1	1	1	1	1	1	1	1	1	1	1	1	1
07_3509_200	NA	NA	NA	NA	NA	NA	NA	NA	NA	NA	NA	NA	4	4	2	2	2	2	2	2	2	2	2	2	2	2	2	2	2	2	2	2	2	2	2	2	2	2	2	2	2	2	2	2	2	2	2	2	2
07_3509_20	NA	NA	NA	NA	NA	NA	NA	NA	NA	NA	NA	NA	1	1	3	3	3	3	3	3	3	3	3	3	3	3	3	3	3	3	3	3	4	4	4	4	4	4	4	4	4	4	4	4	4	4	4	4	4
07_3509_199	NA	NA	NA	NA	NA	NA	NA	NA	NA	NA	NA	NA	1	1	1	1	1	1	1	1	1	1	1	1	1	1	1	1	1	1	1	1	1	1	1	1	1	1	1	1	1	1	1	1	1	1	1	1	1
07_3509_197	NA	NA	NA	NA	NA	NA	NA	NA	NA	NA	NA	NA	2	2	2	2	2	2	2	2	2	2	2	2	2	2	2	2	2	2	2	2	2	2	2	2	2	2	2	2	2	2	2	2	2	2	2	2	2
07_3509_196	NA	NA	NA	NA	NA	NA	NA	NA	NA	NA	NA	NA	2	2	2	2	2	2	2	2	2	2	2	2	2	2	2	2	2	2	2	2	2	2	2	2	2	2	2	2	2	2	2	2	2	2	2	2	2
07_3509_194	NA	NA	NA	NA	NA	NA	NA	NA	NA	NA	NA	NA	1	1	1	1	1	1	1	1	1	1	3	3	3	3	3	3	3	3	3	3	3	3	3	3	3	3	3	3	3	3	3	3	3	3	3	3	3
07_3509_19	NA	NA	NA	NA	NA	NA	NA	NA	NA	NA	NA	NA	1	1	1	1	1	1	1	1	1	1	1	1	1	1	1	1	1	1	1	1	1	1	1	1	1	1	1	1	1	1	1	1	1	1	1	1	1
07_3509_186	NA	NA	NA	NA	NA	NA	NA	NA	NA	NA	NA	NA	1	1	1	1	1	1	1	1	1	1	1	1	1	1	1	1	1	1	1	1	1	1	1	1	1	1	1	1	1	1	1	1	1	1	1	1	3
07_3509_185	NA	NA	NA	NA	NA	NA	NA	NA	NA	NA	NA	NA	3	3	3	3	3	3	3	3	3	3	3	3	3	3	3	3	3	3	3	3	3	3	3	3	3	3	3	3	3	3	3	3	3	3	3	3	3
07_3509_184	NA	NA	NA	NA	NA	NA	NA	NA	NA	NA	NA	NA	4	4	4	4	4	4	4	4	4	4	4	4	4	4	4	4	4	4	4	4	4	4	4	4	2	2	2	2	2	2	2	2	2	2	2	2	2
07_3509_182	NA	NA	NA	NA	NA	NA	NA	NA	NA	NA	NA	NA	2	2	2	2	2	2	2	2	2	2	2	2	2	2	2	2	1	1	1	1	1	1	1	1	1	1	1	1	1	1	1	1	1	1	1	1	1
07_3509_18	NA	NA	NA	NA	NA	NA	NA	NA	NA	NA	NA	NA	2	2	2	2	2	2	2	2	2	2	2	2	2	2	2	2	2	2	2	2	2	2	2	2	2	2	2	2	2	2	2	2	2	2	2	2	2
07_3509_179	NA	NA	NA	NA	NA	NA	NA	NA	NA	NA	NA	NA	4	4	2	2	2	2	2	2	2	2	2	2	2	2	2	2	2	2	2	2	2	2	2	2	2	2	2	2	2	2	2	2	2	2	2	2	2
07_3509_177	NA	NA	NA	NA	NA	NA	NA	NA	NA	NA	NA	NA	3	3	3	3	3	3	3	3	3	3	3	3	3	3	3	3	3	3	3	3	3	3	3	3	3	3	3	3	3	3	4	3	4	4	4	4	4
07_3509_175	NA	NA	NA	NA	NA	NA	NA	NA	NA	NA	NA	NA	3	4	4	4	4	4	4	4	4	4	2	2	2	2	2	2	2	2	2	2	2	2	2	2	2	2	2	2	2	2	2	2	2	2	2	2	2
07_3509_173	NA	NA	NA	NA	NA	NA	NA	NA	NA	NA	NA	NA	4	4	4	4	4	4	4	4	4	4	4	4	4	4	4	4	4	4	4	4	4	4	4	4	4	4	4	4	4	4	4	4	4	4	4	4	4
07_3509_168	NA	NA	NA	NA	NA	NA	NA	NA	NA	NA	NA	NA	3	3	3	3	3	3	3	3	3	3	3	3	3	3	3	3	3	3	3	3	3	3	3	3	3	3	3	3	3	3	3	3	3	3	3	3	3
07_3509_166	NA	NA	NA	NA	NA	NA	NA	NA	NA	NA	NA	NA	1	1	1	1	1	1	1	1	3	3	3	3	3	3	3	3	3	3	3	3	3	3	3	3	3	3	3	3	3	3	3	3	3	3	3	3	3
07_3509_158	NA	NA	NA	NA	NA	NA	NA	NA	NA	NA	NA	NA	2	2	2	2	2	2	2	2	2	2	2	2	2	2	2	2	2	2	2	2	2	2	2	2	2	2	2	2	2	2	2	2	2	2	2	2	2
07_3509_157	NA	NA	NA	NA	NA	NA	NA	NA	NA	NA	NA	NA	1	1	1	1	1	1	1	1	1	1	1	1	1	1	1	1	1	1	1	1	1	1	1	1	1	1	1	1	1	1	1	1	1	1	1	1	3
07_3509_155	NA	NA	NA	NA	NA	NA	NA	NA	NA	NA	NA	NA	2	2	2	2	2	2	2	2	4	4	4	4	4	4	4	4	4	4	4	4	4	4	4	4	4	4	4	4	4	4	4	4	4	4	4	4	4
07_3509_154	NA	NA	NA	NA	NA	NA	NA	NA	NA	NA	NA	NA	3	3	3	3	3	3	3	3	3	3	3	3	3	3	3	3	3	3	3	3	3	3	4	3	4	4	4	4	4	4	4	4	4	4	4	4	4
07_3509_153	NA	NA	NA	NA	NA	NA	NA	NA	NA	NA	NA	NA	4	4	4	4	4	4	4	4	4	4	4	4	4	4	4	4	4	4	4	4	4	4	4	4	4	4	4	4	4	4	4	4	4	4	4	4	4
07_3509_152	NA	NA	NA	NA	NA	NA	NA	NA	NA	NA	NA	NA	4	4	4	4	4	4	4	4	4	4	4	4	4	4	4	4	4	4	4	4	4	4	4	4	4	4	4	4	4	4	4	4	4	4	4	4	4
07_3509_151	NA	NA	NA	NA	NA	NA	NA	NA	NA	NA	NA	NA	4	4	4	4	4	4	4	4	4	4	4	4	4	4	4	4	4	4	4	4	4	4	4	4	4	4	4	4	4	4	4	4	4	4	4	4	4
07_3509_149	NA	NA	NA	NA	NA	NA	NA	NA	NA	NA	NA	NA	3	3	3	3	3	3	3	3	3	3	3	3	3	3	3	3	3	3	3	3	4	3	4	4	4	4	4	4	4	4	4	4	4	4	2	2	2
07_3509_148	NA	NA	NA	NA	NA	NA	NA	NA	NA	NA	NA	NA	2	2	2	2	2	2	2	2	2	2	2	2	2	2	2	2	2	2	2	2	2	2	2	2	2	2	2	2	2	2	2	2	2	2	2	2	2
07_3509_144	NA	NA	NA	NA	NA	NA	NA	NA	NA	NA	NA	NA	3	3	3	3	3	3	4	4	4	4	4	4	4	4	4	4	4	4	4	4	4	4	4	4	4	4	4	4	4	4	4	4	4	4	4	4	4
07_3509_14	NA	NA	NA	NA	NA	NA	NA	NA	NA	NA	NA	NA	2	2	2	2	2	2	2	2	2	2	2	2	2	2	2	2	2	2	2	2	2	2	2	2	2	2	2	2	2	2	2	2	2	2	2	2	2
07_3509_137	NA	NA	NA	NA	NA	NA	NA	NA	NA	NA	NA	NA	2	2	2	2	2	2	2	2	2	2	2	2	2	2	2	2	1	1	1	1	1	1	1	1	1	1	1	1	1	1	1	1	1	1	1	1	1
07_3509_135	NA	NA	NA	NA	NA	NA	NA	NA	NA	NA	NA	NA	4	4	4	4	4	4	4	4	4	4	4	4	4	4	4	4	4	4	4	4	4	4	4	4	4	4	4	4	4	4	4	4	4	4	4	4	4
07_3509_134	NA	NA	NA	NA	NA	NA	NA	NA	NA	NA	NA	NA	3	3	3	3	3	3	3	3	3	3	3	3	3	3	3	3	3	3	3	3	3	3	3	3	3	3	3	3	3	3	3	3	3	3	3	3	3
07_3509_133	NA	NA	NA	NA	NA	NA	NA	NA	NA	NA	NA	NA	2	2	2	2	2	2	2	2	2	2	2	4	4	4	4	4	4	4	4	4	4	4	4	4	4	4	4	4	4	4	4	4	4	4	4	4	4
07_3509_13	NA	NA	NA	NA	NA	NA	NA	NA	NA	NA	NA	NA	2	2	2	2	2	2	2	2	2	2	2	2	2	2	2	2	4	4	4	4	4	4	4	4	4	4	4	4	4	4	4	4	4	4	4	4	4
07_3509_126	NA	NA	NA	NA	NA	NA	NA	NA	NA	NA	NA	NA	3	3	3	3	3	3	3	3	3	4	4	4	4	4	4	4	4	4	4	4	4	4	4	4	4	4	4	4	4	4	4	4	4	4	4	4	4
07_3509_124	NA	NA	NA	NA	NA	NA	NA	NA	NA	NA	NA	NA	1	1	1	1	1	1	1	1	1	1	1	1	1	1	1	1	1	1	1	1	1	1	1	1	1	1	1	1	1	1	1	1	1	1	1	1	1
07_3509_123	NA	NA	NA	NA	NA	NA	NA	NA	NA	NA	NA	NA	2	2	2	2	2	2	2	2	2	2	2	2	2	2	2	2	2	2	2	2	2	2	2	2	2	2	2	2	2	2	2	2	2	2	2	2	2
07_3509_121	NA	NA	NA	NA	NA	NA	NA	NA	NA	NA	NA	NA	1	1	1	1	1	1	1	1	1	1	1	1	1	1	1	1	1	1	1	1	1	1	1	1	1	1	1	1	1	1	1	1	1	1	1	1	1
07_3509_120	NA	NA	NA	NA	NA	NA	NA	NA	NA	NA	NA	NA	1	1	1	1	1	1	1	1	1	1	1	1	1	1	1	1	1	1	1	1	1	1	1	1	1	1	1	1	1	1	1	1	1	1	1	1	1
07_3509_118	NA	NA	NA	NA	NA	NA	NA	NA	NA	NA	NA	NA	1	1	1	1	1	1	1	1	1	1	1	1	1	1	1	1	1	1	1	1	1	1	1	1	1	1	1	1	1	1	1	1	1	1	3	3	3
07_3509_115	NA	NA	NA	NA	NA	NA	NA	NA	NA	NA	NA	NA	1	1	1	1	1	1	1	1	1	1	1	1	1	1	1	1	1	1	1	1	1	1	1	1	1	1	1	1	1	1	1	1	1	1	1	1	1
07_3509_113	NA	NA	NA	NA	NA	NA	NA	NA	NA	NA	NA	NA	1	1	1	1	1	1	1	1	1	1	1	1	1	1	1	1	1	1	1	1	1	1	1	1	1	1	1	1	1	2	2	2	2	2	2	2	2
07_3509_112	NA	NA	NA	NA	NA	NA	NA	NA	NA	NA	NA	NA	4	4	4	4	4	4	4	4	4	4	4	3	3	3	3	3	3	3	3	3	3	3	3	3	3	3	3	3	3	3	3	3	3	3	3	3	3
07_3509_111	NA	NA	NA	NA	NA	NA	NA	NA	NA	NA	NA	NA	3	3	3	3	3	3	3	3	3	3	3	3	3	3	3	3	3	3	3	3	3	3	3	3	3	3	3	3	3	3	3	3	3	3	3	3	3
07_3509_108	NA	NA	NA	NA	NA	NA	NA	NA	NA	NA	NA	NA	1	1	1	1	1	1	1	1	1	1	1	1	1	1	1	1	1	1	1	1	1	1	1	1	1	1	1	1	1	1	1	1	1	1	1	1	1
07_3509_107	NA	NA	NA	NA	NA	NA	NA	NA	NA	NA	NA	NA	4	4	4	4	4	4	4	4	4	4	4	4	4	4	4	4	4	4	4	4	4	4	4	4	4	4	4	4	4	4	4	4	4	4	4	4	4
[truncated: 1,021 more columns]

## Sheet: ST5.QTL
Supplementary Table 5. QTL summary statistics of PM severity by tissue and year in B37-28 x C56-11, in 9 vineyard years, two greenhouse timepoints, and one laboratory experiment.
Tissue	Year	N	Peak Marker	Interval (Mb)	LOD Score	% variance marker	% variance model
Leaf	2006	49	1_8477332	6.87 - 10.67	5.1		0.38
	2009	52	15_13063122	12.25 - 15.46	6.1		0.418
	2010_July	98	15_15160259	13.06 - 17.99	7.5		0.297
	2010_Aug	99	6_506716	0.50 - 2.03	4.2	0.315	0.705
			15_15160259	13.06 - 16.22	10.6	0.526
			6_506716 15_15160259	-	12.8	0.24
	2011_July	186	6_17921641	15.85 - 21.33	4.4	0.029	0.548
			15_13822901	13.06 - 15.16	29.5	0.445
	2012_July	140	15_14360708	12.84 - 16.22	15.2		0.393
	2012_Sept	140	15_14360708	12.84 - 16.22	34.8		0.348
	2013_Aug	196	6_20646740	15.85 - 21.33	5.1	0.052	0.348
			15_13063122	6.45 - 16.55	14.9	0.235
	2014_Aug	244	15_13063122	6.45 - 16.56	7.7		0.136
	2014_Sep	241	15_15160259	13.82 - 16.22	41.9		0.551
	AUDPC_2016	241	15_13822901	13.06 - 15.16	53.7		0.642
	AUDPC_2017	231	15_14360708	12.84 - 16.22	17.2		0.29
	GH_2006_09	41	17_7780366	6.20 - 12.16	4.4		0.391
	GH_2006_11	49	2_328355	0.39 - 4.60	5		0.377
	LabHT_2015	68	1_7478412	6.87 -9.70	4.8		0.279
Rachis	2009	49	15_13063122	6.45 - 13.82	7		0.483
	2010_July	91	15_15160259	13.06 - 16.22	10.4		0.41
	2010_Aug	89	15_15160259	13.06 - 15.47	12.2		0.469
	2011_July	41	15_12844486	2.99 - 16.22	11		0.711
	2012_July	129	15_14360708	11.42 - 16.22	18.2		0.478
	2012_Sept	91	15_13822901	13.06 - 15.16	25.1		0.719
	2013_Aug	174	6_21330468	17.68 - 21.33	6.3	0.032	0.395
			15_14360708	13.06 - 16.22	17	0.242
	2014_July	235	15_2868330	2.86 - 16.66	5		0.094
	2014_Sep	164	5_20429993	18.63 - 21.58	5.2	0.049	0.538
			15_13822901	12.84 - 15.16	23.9	0.403
	AUDPC_2016	225	15_14360708	13.06 - 15.16	67.6		0.75
	AUDPC_2017	201	15_13822901	12.84 - 16.55	19.9		0.367
Berry	2009	49	7_22046989	7.44 - 24.51	5.5	0.192	0.585
			15_13063122	12.84 - 13.82	5.3	0.183
	2010_July	91	15_15160259	13.06 - 15.47	14.7		0.524
	2010_Aug	89	15_15160259	13.06 - 15.47	14.9		0.537
	2011_July	41	15_15468122	12.25 - 16.22	29		0.962
	2012_July	129	15_14360708	12.25 - 17.15	10.5		0.312
	2012_Sep	88	15_12844486	2.86 - 16.22	5.5		0.249
	2013_Aug	174	15_16000117	12.25 - 17.15	10.3		0.239
	2014_July	235	15_14360708	11.42 - 16.45	4.2		0.079
	2014_Sep	164	5_14113858	9.10 - 18.63	4.2	0.211	0.476
			15_14360708	13.06 - 15.16	11	0.365
			5_14113858 15_14360708	-	9.4	0.159
	AUDPC_2016	225	15_14360708	13.06 - 15.16	76.3		0.79
	AUDPC_2017	201	15_13822901	12.25 - 16.55	17.8		0.335
Stem	2010_July	45	15_14360708	13.06 - 17.99	5.6		0.437
	2010_Aug	99	15_15160259	13.06 - 16.22	12.4		0.438
	2011_July	186	15_14360708	13.06 - 16.22	17.3		0.348
	2012_July	140	6_20646740	15.85 - 21.33	4.2	0.044	0.394
			9_5566204	4.91 - 19.94	4.2	0.096
			15_14360708	6.99 - 16.22	9	0.152
	2012_Sept	141	15_11421844	0.48 - 16.22	9.2		0.259
	2013_Aug	196	9_5920608	3.6 - 20.12	6.5		0.141
	2014_July	244	8_1222997	0.47 - 11.99	5	0.298	0.552
			9_18463570	13.4 - 16.09	11.6	0.247
			10_1111687	0.42 - 2.60	4.1	0.134
			8_1222997 9_18463570	-	11	0.104
			8_1222997 10_1111687	-	10.5	0.098
	2014_Sep	241	9_18463570	5.5 - 16.00	4.8	0.084	0.25
			15_11503363	0.48 - 16.22	9.44	0.162
	AUDPC_2016	228	8_1222997	0.31 - 12.84	5.1	0.09	0.363
			9_19496885	14.19 - 16.09	8.11	0.152
			15_14360708	13.06 - 16.22	6.4	0.115
	AUDPC_2017	231	8_2017540	0.47 - 11.99	5.6	0.119	0.36
			9_18463570	14.19 - 22.83	13.8	0.254

## Sheet: ST6.R-alleles
Supplementary Table 6. Desirable local haplotype resistance alleles from B37-28.
rh_chr15_10773666	Leaf AUDPC	GCAGAAATTAAAATTATCAACACACTTAGTGGGAAAAAAAAATGCACTGAGACATACTATAACAAGCCACCCAAAAAGTATTCAAATCATCGTAAATCATGAGGACCCAATTATCCTTTTTAGCTGCCAAATCCAAGAGTACATGATTCCAAATGCACAGTATACAGAGATCAACATAAGGGGTAC
rh_chr15_10990214	Leaf AUDPC	GAGTGCTTGGGATGTCAAGAATCCCATTTTGCCAGTGTCCAGATTGAGTCTCTCCATTTCTAAAGGTGTACATTCCAAGCCCTTGCCTTCTACCCTCATGCCAGGCTCCCTCATACCGATGACCGTTGGCAAACTTATAAATTCCAAACCCATGCATCTTGTC
rh_chr15_11204418	Leaf AUDPC	GAAGCAGCGTTGAGCAAAGCATCAATGCCCAACAAGACTGTAATAATCACAATAGTGAACAAAGCCTATGTCGAAGGCGACGACACATCGATGCTGGATCTTTTTCTGGAGAGCTTCTGGATCGGAGAAGGCACAAGGGAGATGGCGGAGCACCTGTTGGTGGTAGCGATGGACCAGACGGCGTTCGACCGCTGCATTTTCCGG
rh_chr15_11421844	Leaf AUDPC	GTATGCAACAACATAGCAAGAAGGGCTACAATTGGCGTAGTTTAAAATCCTCTCTAGGTAGCTTTGAATTGAGATATTGGGGCGGGTGAGGCCATGGAAGACTGAAATCTTCTGCGGTAGAAATCTTCTATTGAGGTCATTGGACTCAGCCACTCTCTGGAGTATAGAGGAG
rh_chr15_11503363	Leaf AUDPC	CTGAAATATAATTCTTTCATAATCAAAGTTCAACCAAATTATTATGATTCTTATTCAGCACATCAACATTATTAAATAATTGGTACCATGTCATTCTTGTGACATGATTAAAATTTGAAAACATTGTTTTCATTTTTAATGTTTTGAATGG
rh_chr15_12844486	Leaf AUDPC	GATGAGATTGCAGGAAACTTTGTGGTGTCCACTCGATCTATGAATGTGCTTGGGTAGCATATCATTCTGTATGTGAACTGATCTCCTTTTGTTCTCTCCTAAAAAGTAGCTTAGGGTTTTGATACTTACTCACAGAAAAACCTCCAAATTTGGGAACGTCTAAGAGGATGCCCACTGGAGAAG
rh_chr15_13063122	Leaf AUDPC	GGAACTTGAAAATCCAGCTTGTTTTTTGCAATTAATTTATCAAAGAACACATGCATTGTTAATATGTAGAGAAACAATACCCTTGAAATATGGAAATCCCGTTTTGGTGGGGATGATCGGTCACCACAAGAGCACCATTATTTTGCGATGTATCTCCAGGTGAGTTCCTCGTTATTCCATCAGG
rh_chr15_13698923	Leaf AUDPC	GGTCTATTTTGTAGCTCATAGGGCAAACCATGTAGATTAATCAATTCTCACCCTTTTGTCCTATGCCTCATCATCGGTCTATTTTTCTCTTCTTGTATTCATGAATCTCTAAAGTAATTAATTAATACGAATTTTACCATTAATAACCAGCCTTAGCCTTTGGCTTGTC
rh_chr15_13822901	Leaf AUDPC	CACAAATTTGCCTTATAGTTTAAAAGTGATATGTTGCTAGAAAACAGAGCATAAAATTATGTGCATAAGTGGTGAGAAAAAATTACTTTAGCTTGTATTACAAAGTAAAAATTTATAAAAGCTATGCAACACATCCAAGAAATTCAAAAGGATTACAGCAACTGAATTATTCTTTCGTCTAGTCTTCC
rh_chr15_15294725	Leaf AUDPC	CCCACCCCCACTGCCAAGACTACAAACCAACACATTTGAATCTGTCCCGGTTTATAAGAGAACTGATAAATTATGGGTTTGACCAAATCAATCATGTTCCCCAAAAAGAGTAGTCTCTGGGCCTTTTAGGCTTACAGAAATCAGGAGCAAGGCATGAAGAAATGG
rh_chr15_15543151	Leaf AUDPC	GATAGGAACTGTTTTTAGCTTTTCTAATACTTAGAAATTTTTATCTTTCAAGAAAGGTTAGAAACACTTTTTAAAATCACTACTAAACGCACTCTTAATTTTCTTGAATTCCCAAAATTTCCCACAAACATTTGACCATAGTCCAAACAATCTAGTAGCAAAAAAGAAATAGTAAAACAATAAACTGGCAGGATTC
rh_chr15_15944126	Leaf AUDPC	GAAGCAATTGCAGAAGCTTCCACAGGCTTTCTTGAACGCTGGCGGCCACGGTGCATGTGCCGCTCACAGTACTTCTGGTCTGGAACCACATCCTTACTGCACCTCCATTTCTTCCCATCTGTTCTCCTACACCTTCCTGGTTCAGGATCCATGACGTTCCTATAATCAAATCCCTG
rh_chr15_16000117	Leaf AUDPC	GCTGATGTGGATTAAAGATTTGGTTAATGCTACATGAAGACTTCTACTATGTGTGAAGTACATACCTAATGTGTGTGAAGTACATATATTTACGTGGAATGATAGTACAAAAGTTTGAAATGCATATGATAATAAAAAGGGTGCATTTAATCGCTTCCTAGTTCATGAGAAGTTGTCCCTTATGCATTTTTAATATGCTCACTAGTTAC
rh_chr15_16066225	Leaf AUDPC	CGCATTGTTCTCGCTGTCTGATTCCTTGGGGCCAGTATGGTAATAAATTTCTGTGAATTTTTCGTATTTTCTGCATTCTCTTTGTTTCTTTTAGTGTTGGGGGTTTGAGTTTGATTTATGGTTGTTGGGCAGATGGGCTTTATTTAATTGAAATAGATAGGATTTTACGG
rh_chr15_16221824	Leaf AUDPC	GGAACAAACTCTGTTTCAGTTATTACGGGTCTCGGAGAATTAAATTTCTCAAGAGTGGCTTTGGTCAGAAAAGGTTATAAATCAAAATAAAAGACAAGCAGAAATCACTCACCTAAGGTCAGAGAGTTGAAGTTTTCCTTTGGAATCATGTAGCAAGAGTTCTAGAGC
rh_chr15_16450847	Leaf AUDPC	GAGCAAAGGGAGGAAAATCACAGTGAGAGTAGGGAGGATGCTAAAGAGGACTCAGAGGAGCAAGTGATTGGTTTCAAAGTGAAGAACGCAGTTCTCTCCCCTCACGAAGTAGAAAAAGGGGTATGGCCTGAGAACTACTCTCTGTCTGATCATGCCAG
rh_chr15_16551845	Leaf AUDPC	CTTCGTACGGTCTATCCTCGCCCGCCTCTGCTTCTCCCGCTTTCTGTTGAATCGCAGACCAGTTCTCCTTGCCCATCCGTCTATCTGAATCCCCTCATCATTTTTTCCAATTGTTTCTTTTCTTTTCCTTTTTGTTTTGTTTTGTCTTGTTTTATTTCACTTTTGTTTCGTTTTACAAAAGAAGGAAAGAGC
rh_chr15_16667790	Leaf AUDPC	CATCCGGTCATCTCTCAGAAACCTACTCACTAATTGAATTATCACTAAGAAGTTAAACTGCAAGCAAATCTAGGGCCATAATTGGAATCATGGTCGATTGATTCTCACCGAGACCATCCCTGTGGAGACCCACAATCCAACAAAACCAGCTGCTGCAAGGGAGCTCACTGCATACTTATCTTC
rh_chr8_1155960	Stem AUDPC	GACAGTTGTTAGCCGAGAAGTTGTCGAAACTCAACAACTCACAACAAAGCATAGAGTGTATCCTTCATATTGAAACATCATACTTATATTTATAGTTATGGAAAACTGTGGCTTGATTTTATAAAACCTGCAAGGCTTGATTGCTTATTGGTCCTTAAATGGCATTTAACTGTAGTTAGT
rh_chr8_1222997	Stem AUDPC	CAAAGCAGTACCAAATGCTAGGCATATATCTTCAAAGATCATGGCTAGTCTTGGGCGTAACATCACTCTTTCTTCTCCCAGTGTTCATTTTCACCACCCCGATTTTGAAGGCTTTAGGCCAGGAAGAGGATATTGCAGAAGTTGCTGGATACGTTTCTCTGTGGCTAATCCCGGCTATGTTTGCC
rh_chr8_2017540	Stem AUDPC	GAAGGGCCAGTGGTGGTTGTCCGGGAATATGACTTCCCCAACAGACAATGCTGAAGAGGTTGCCACCAAAATTGACAAGGAGGTTCTGGAAGCACAGAAAATGCTGCAGCTTGCTGCTTCACAAAGGATGAACACAGATGCCAGAAGGGCAATCTTTTGTATAATAATGAGTGGAG
rh_chr8_2197734	Stem AUDPC	CTTTGCATGCACAGCAGAGGCACCATAAGAGAGTTGAAGGAGAACATCCATGCAGTCATGGAAACGCTATGTGTTCAACAGTTGGTGCTGTATTCAGATGGCTCAGAGTTGCAGGATCATTGGTCTTTGCATCAGTCTGGGCTTTCGGATGGTTCGGAGATCGATGTCGGGTTTATGG
rh_chr8_2666965	Stem AUDPC	GAACAGTGAATGAATCATATGTTACTTTTTTGTATATTTTGCAATTTTCAATGGTGAGACTAATTGTTTTCTCTTGTAAATAATACTCCTAAAAGGCTTTAATAAGATTCTTATCCTATGTTTGATTCTTGGAAAGTTTGAGTAAAAATGC
rh_chr8_2784591	Stem AUDPC	CGAAGACACAGCTCACTGCAGAATGCAGTTTATGTACCAGCAGCTGATGTGGATGAAATCTATGGAAGCTCCTCAAACTGCTTAGCTTAGGATGTGTGTGAAGAATATGAATGGGGGTTGGAATATGAATGACTCTTATACTGGCTGATGCTTTGAGTGAGTTGTTTGTTTGTATAATTAATATTCCCTTGG
rh_chr9_19496885	Stem AUDPC	CTTGCAGAATACAAAAGATAATCCTCCTTGCAATACCCTATTTATTGGAAATCTTGGGGAGAACATAAATGAGGAAGAACTGAGGGGTCTTTTCAGTGTGTATGAATATCTCATCCTTGACTATTTTTTGAGCTGTGACCTTTTATTTTGTTTTACTTATCCTTGGGATTGGAGTTCTCTGTGGCACTTATACTTTTTGAGTAATGCAGAC
rh_chr9_19584618	Stem AUDPC	CTTGTCAATCATTGTTGGTTCTTCTTTGTTGCTTTAAGACTTTGAGTAATTTCTCGTCCTTCCCTTTGCATCTTATTCTTTCTATATAGAAATCTCCATTTTGTATTAAAGATGTGGAAGGACAGCATCAAATTTTGGATTCTCAAGTAGAACTTTGCATTTTTCTGGAGTTCCCAGCCTTTGACATACTTGGAGAGGTGCTATGGTT
rh_chr9_20127590	Stem AUDPC	ATTACACCAATTAACAAAAACAAAACAAAACAAAACAAAATCCAACAAATTCACACTCAATAACAAAAAATAAAAAAGTAAAAGAATTGATGATTCATTAATGGCACTGCATTGAAATACAGTGCATGCAACAGCAAAACCAATGATGAAAGCGCAACAAATCTTACCCTCCATCGCTTCAGCGTCTC
rh_chr9_20989379	Stem AUDPC	GCTTCAAATTCGTGTGATATTAAAAATATCAGTTCAAATAGATTACACAAAACATCAACCCGTTTTCCTGTCCAGAAAATGCAGGAAAATAACAAAAACTCAAACCCAATTTTAGATTCTCTCTTCAGCCGTTTCACATTCAGGGTCGGTTAGCACTGCG

## Sheet: ST7.REN11-Germplasm
Supplementary Table 7. Of the existing VitisGen database of 20,651 vines, these 396 vines were identified as having the REN11 locus based on a Bayes Factor threshold of 7000, for the desirable resistance alleles shown in Suppl. Table 5. The 3 markers at the REN11 peak coincide with the dotted red box in Fig. 5. The REN11-specific alleles highlighted in blue show divergence in the four false-posit…
			rh_Chr15 10773666	rh_Chr15 10990214	rh_Chr15 11421844	rh_Chr15 11503363	rh_Chr15 12844486	rh_Chr15 13063122	rh_Chr15 13698923	rh_Chr15 13822901	rh_Chr15 15294725	rh_Chr15 15543151	rh_Chr15 15944126	rh_Chr15 16000117	rh_Chr15 16066225	rh_Chr15 16221824	rh_Chr15 16667790		rh_Chr15 16450847	rh_Chr15 16551845
Source	Sample	Bayes Factor					REN11 specific	REN11 specific	REN11 peak	REN11 peak	REN11 peak	REN11 specific	REN11 specific		REN11 specific				Tamiami × Solbrio issues	Tamiami × Solbrio issues
B37-28 × C56-11	B37_28	368675	3/4:55,42	7/3:62,40	3/2:33,26	4/2:64,43	1/9:25,11	3/1:35,34	4/2:44,33	1/3:10,7	2/1:355,244	9/3:32,18	4/1:12,6	4/7:17,12	7/1:98,78	3/1:26,24	2/1:15,10		1/4:172,139	2/1:7,5
B37-28 × C56-11	B37_28	368675	3/4:50,41	7/3:53,44	3/2:31,26	2/4:39,36	9/1:22,13	3/1:28,27	4/2:41,27	1/3:33,28	2/1:316,240	9/3:29,17	4/1:43,42	4/7:16,13	7/1:90,79	3/1:15,15	2/1:30,24		4/1:149,137	1/2:12,8
B37-28 × C56-11	B37_28	368675	3/4:48,40	3/7:45,45	2/3:32,22	2/4:51,51	9/1:11,7	3/1:42,26	4/2:38,26	3/1:25,21	2/1:342,243	3/9:32,27	1/4:53,47	7/4:11,8	7/1:100,64	1/3:24,23	1/2:34,29		4/1:136,109	1/2:7,5
B37-28 × C56-11	B37_28	368675	3/4:72,53	7/3:55,32	2/3:27,26	2/4:45,43	1/9:22,9	3/1:36,27	4/2:44,32	1/3:33,25	2/1:356,249	9/3:36,25	4/1:51,43	7/4:16,12	7/1:91,77	1/3:20,19	2/1:36,35		4/1:158,144	1/2:8,2
B37-28 × C56-11	B37_28	368675	3/4:61,41	3/7:59,46	3/2:24,22	4/2:53,47	9/1:13,13	3/1:27,15	4/2:40,21	1/3:33,25	2/1:329,282	9/3:28,22	4/1:56,42	4/7:10,9	7/1:93,91	3/1:23,23	2/1:37,34		1/4:177,127	2/1:7,3
B37-28 × C56-11	B37_28	368675	3/4:56,39	3/7:47,46	2/3:36,33	2/4:24,19	9/1:8,3	3/1:2,1	4/2:32,23	3/1:27,21	2/1:332,172	9/3:20,20	4/1:58,43	4/7:15,9	7/1:63,58	3/1:5,3	1/2:27,23		1/4:118,84	1/2:10,5
B37-28 × C56-11	B37_28	368675	3/4:43,41	3/7:41,32	3/2:28,28	2/4:35,19	9/1:7,3	1/3:2,2	4/2:33,29	1/3:31,21	2/1:338,150	9/3:30,28	1/4:52,43	7/4:9,8	1/7:65,57	3/1:5,4	2/1:34,29		4/1:96,81	2/1:10,7
B37-28 × C56-11	B37_28	368675	3/23:58,44	3/7:52,46	2/3:41,33	4/2:39,27	9/1:8,4	3/3:3	4/2:46,23	3/1:32,23	2/1:408,187	9/3:34,30	4/1:51,33	4/7:14,11	1/7:61,54	3/1:11,5	1/2:29,28		4/1:117,114	2/1:7,6
B37-28 × C56-11	B37_28	124073	3/23:34,24	7/3:39,36	2/3:23,14	2/4:28,18	9/1:5,3	3/1:26,18	2/4:19,18	1/3:18,7	2/1:231,160	9/3:19,13	1/4:25,15	4/7:12,9	7/1:52,46	1/3:17,11	2/1:19,13		4/1:85,83	2/1:3,3
B37-28 × C56-11	B37_28	124073	4/3:49,43	7/3:64,40	2/3:36,30	2/4:38,27	9/1:6,3	138/1:1,1	4/2:47,20	1/3:24,22	2/1:293,154	3/9:28,23	1/4:62,48	7/4:10,8	1/7:53,49	3/1:10,8	1/2:30,29		1/4:99,84	2/1:4,4
B37-28 × C56-11	07_3509_177	3.08699e+06	3/4:15,14	3/7:11,11	3/2:10,7	4/2:10,7	1/9:4,2	2/3:7,7	4/4:8	1/4:4,3	2/4:86,68	9/9:5	4/1:5,4	2/7:6,1	7/2:21,6	1/3:7,5	2/1:7,5		1/4:25,19	2/3:4,3
B37-28 × C56-11	07_3509_185	3.08699e+06	4/23:21,14	7/3:16,11	3/2:9,7	2/4:7,7	1/9:4,3	2/3:8,3	4/2:9,6	3/1:7,4	2/4:139,120	9/9:8	4/1:10,9	7/2:4,3	7/2:19,9	3/1:9,5	2/1:15,12		4/1:29,24	2/2:1
B37-28 × C56-11	C83-247	3.08699e+06	4/1:29,19	1/7:21,21	1/3:11,9	2/1:16,10	3/9:6,4	3/1:8,4	4/2:21,10	3/1:17,13	2/4:197,125	9/9:13	4/1:29,28	7/7:1	7/2:53,16	1/3:12,2	2/1:18,18		1/4:54,38	2/3:4,2
B37-28 × C56-11	Y312_014	3.08699e+06	4/3:61,61	3/7:58,50	3/2:37,28	4/2:64,38	9/1:22,16	2/3:42,42	4/4:48	1/4:6,2	2/4:304,188	9/9:33	4/1:3,3	2/7:15,9	7/2:67,18	1/3:45,19	1/2:8,6		1/4:134,113	3/2:8,6
B37-28 × C56-11	Y312_035	3.08699e+06	4/1:76,75	1/7:66,65	1/3:47,44	1/2:60,44	3/9:24,21	3/1:52,41	2/4:50,46	3/1:4,2	2/4:329,183	9/9:46	4/4:4	2/7:26,18	7/2:54,26	1/3:68,22	2/1:3,2		1/4:166,145	3/2:9,5
B37-28 × C56-11	Y519_196	3.08699e+06	3/4:85,64	7/3:61,59	3/2:57,38	4/2:74,54	1/9:25,15	3/2:48,46	4/4:53	4/1:15,13	2/4:410,224	9/9:33	4/1:9,8	2/7:21,21	7/2:77,53	1/3:56,29	1/2:13,7		1/4:193,189	2/3:13,3
B37-28 × C56-11	Y533_243	3.08699e+06	3/4:85,78	7/3:86,62	3/2:51,39	2/4:63,60	9/1:22,21	3/2:43,42	4/4:74	1/4:5,2	2/4:347,211	9/9:50	4/1:3,2	7/2:27,26	7/2:71,17	1/3:59,29	2/1:2,2		1/4:244,179	3/2:12,11
B37-28 × C56-11	07_3509_151	1.0753e+06	3/4:13,11	7/3:16,11	3/2:8,6	4/2:8,5	9/1:2,1	3/2:7,3	4/4:10	4/1:6,2	2/1:128,117	1/9:6,4	4/1:4,3	7/5:4,3	1/7:21,15	3/1:5,4	1/2:6,5		1/4:22,14	2/3:5,1
B37-28 × C56-11	07_3509_154	1.0753e+06	23/4:13,12	3/7:12,9	2/3:10,9	2/4:6,4	1/9:3,2	2/3:5,2	4/4:6	1/4:9,4	1/2:151,146	9/1:11,5	1/4:8,7	5/7:5,4	7/1:29,26	1/3:14,5	2/1:8,8		1/4:41,30	3/2:5,3
B37-28 × C56-11	07_3509_166	1.0753e+06	4/1:13,12	7/1:16,12	1/3:12,12	1/2:17,8	3/9:6,4	1/3:11,6	4/2:13,10	3/1:9,4	2/4:180,113	9/9:6	4/1:6,5	7/2:6,4	7/2:21,17	1/3:18,6	2/1:11,8		1/4:36,35	3/2:4,2
B37-28 × C56-11	07_3509_18	1.0753e+06	4/1:24,19	7/1:19,10	3/1:12,8	2/1:6,4	9/9:1	3/1:11,5	4/2:12,8	3/1:3,3	2/4:150,91	9/673:9,1	4/1:4,3	2/7:4,4	2/7:15,11	1/3:5,4	2/1:11,2		1/4:42,25	3/2:4,3
B37-28 × C56-11	07_3509_186	1.0753e+06	3/4:18,17	7/3:20,17	2/3:12,5	4/2:12,5	9/1:4,4	2/3:7,7	4/4:10	4/1:6,1	2/1:171,146	1/9:11,7	4/53:4,1	5/7:7,4	7/2:22,10	1/3:7,4	1/2:7,1		4/1:39,33	3/2:2,1
B37-28 × C56-11	07_3509_35	1.0753e+06	4/23:14,13	7/3:16,11	3/2:14,10	4/2:10,7	9/1:3,1	2/3:5,5	4/4:8	4/1:2,2	2/1:147,124	1/9:8,3	1/4:3,1	5/7:4,4	7/1:24,19	1/3:6,3	1/2:5,3		1/4:31,28	3/2:3,2
B37-28 × C56-11	C84-51	1.0753e+06	4/1:27,21	1/7:25,16	3/1:11,9	2/1:23,19	3/9:4,4	3/1:5,4	4/2:21,15	3/1:16,10	2/4:319,152	9/9:9	1/4:25,24	7/2:10,8	7/2:44,16	1/3:10,8	2/1:13,12		1/4:63,43	3/2:5,4
B37-28 × C56-11	Y312_002	1.0753e+06	4/1:63,45	1/7:45,27	3/1:38,26	1/2:46,41	9/3:12,10	1/3:38,35	4/2:34,28	3/1:21,14	2/4:250,153	9/9:31	4/1:20,14	7/2:16,11	7/2:59,33	1/3:37,24	2/1:20,20		1/4:129,127	3/2:11,7
B37-28 × C56-11	Y312_003	1.0753e+06	3/4:51,38	3/7:42,37	3/2:28,28	4/2:44,34	1/9:17,12	3/2:36,27	4/4:41	4/1:23,22	2/1:293,271	1/9:35,21	4/1:38,31	7/5:16,14	7/1:76,72	1/3:40,20	1/2:28,23		1/4:133,110	3/2:11,6
B37-28 × C56-11	Y312_009	1.0753e+06	1/4:49,49	7/1:57,49	3/1:43,34	1/2:62,48	9/3:16,12	3/1:42,32	4/2:48,38	1/636:7,1	2/4:336,149	9/9:51	1/4:3,1	2/7:23,9	7/2:73,33	1/3:45,21	2/1:7,5		4/1:163,143	2/3:5,4
B37-28 × C56-11	Y312_011	1.0753e+06	4/1:56,55	1/7:59,57	3/1:45,30	2/1:66,60	9/3:19,16	1/3:43,34	4/2:56,36	3/1:11,3	2/4:363,195	9/9:38	4/1:8,5	2/7:20,20	7/2:80,35	1/3:53,27	2/1:12,5		1/4:167,165	3/2:9,8
B37-28 × C56-11	Y312_013	1.0753e+06	3/4:77,64	3/7:83,56	3/2:45,35	4/2:62,58	1/9:22,19	3/2:53,49	4/4:63	4/1:2,1	2/1:286,277	9/1:29,29	4/225:1,1	5/7:18,17	7/1:60,57	1/3:60,37	2/1:3,1		1/4:170,134	2/3:13,9
B37-28 × C56-11	Y312_016	1.0753e+06	4/3:47,40	7/3:56,45	3/2:29,23	4/2:51,40	9/1:23,21	3/2:36,34	4/4:46	4/1:29,26	1/2:308,298	9/1:34,21	1/4:33,29	5/7:14,13	7/1:74,52	1/3:46,29	1/2:27,25		1/4:140,133	2/3:7,6
B37-28 × C56-11	Y312_020	1.0753e+06	3/4:67,52	7/3:52,44	2/3:30,29	4/2:66,43	9/1:17,13	3/2:43,29	4/4:45	1/408:4,1	1/2:276,248	9/1:33,20	4/1:4,4	5/7:19,11	1/7:63,59	1/3:46,24	2/1:5,4		1/4:157,146	3/2:10,8
B37-28 × C56-11	Y312_024	1.0753e+06	3/4:77,53	3/7:64,47	2/3:38,30	2/4:41,33	9/1:22,11	2/3:48,32	4/4:53	4/1:2,1	2/1:260,235	9/1:45,40	1/4:2,1	5/7:24,15	1/7:43,41	1/3:40,24	1/2:6,2		1/4:158,131	3/2:10,9
B37-28 × C56-11	Y312_033	1.0753e+06	3/4:63,49	3/7:53,44	3/2:38,37	2/4:49,44	1/9:12,11	2/3:31,24	4/4:36	4/1:11,10	2/1:306,294	9/1:31,24	4/1:4,3	5/7:18,5	7/1:84,72	1/3:55,29	2/1:13,7		1/4:152,134	3/2:8,8
B37-28 × C56-11	Y312_034	1.0753e+06	4/1:64,58	1/7:63,59	1/3:53,30	2/1:54,47	9/3:23,21	3/1:27,26	4/2:50,49	1/3:5,4	2/4:292,188	9/9:31	4/1:3,3	2/7:24,18	7/2:74,28	1/3:53,29	2/1:4,3		1/4:156,139	2/3:7,6
B37-28 × C56-11	Y312_037	1.0753e+06	3/4:78,77	7/3:62,58	2/3:36,27	2/4:58,53	1/9:19,14	2/3:45,39	4/4:43	4/1:12,8	1/2:389,347	9/1:45,31	4/1:12,7	7/5:18,16	7/1:77,61	1/3:47,26	1/2:12,7		4/1:186,182	3/2:8,4
B37-28 × C56-11	Y312_038	1.0753e+06	3/4:60,41	7/3:70,52	3/2:34,29	2/4:50,50	9/1:18,16	3/2:48,38	4/4:49	1/4:13,5	2/1:311,296	1/9:25,22	4/1:3,3	5/7:18,10	7/1:76,70	1/3:46,28	1/2:14,5		4/1:171,155	3/2:10,4
B37-28 × C56-11	Y312_045	1.0753e+06	1/4:63,52	7/1:54,52	1/3:42,35	1/2:57,51	9/3:19,17	3/1:43,29	4/2:69,31	3/1:5,4	2/4:325,179	9/9:36	4/1:6,5	7/2:22,17	7/2:88,30	1/3:42,24	2/1:7,3		1/4:171,158	3/2:10,8
B37-28 × C56-11	Y312_051	1.0753e+06	3/4:63,54	7/3:58,55	2/3:30,22	2/4:53,48	9/1:14,11	3/2:38,35	4/4:56	4/1:7,3	1/2:293,280	1/9:45,39	4/1:3,2	5/7:20,12	7/1:46,46	1/3:41,20	1/2:5,3		1/4:170,137	3/2:6,5
B37-28 × C56-11	Y312_055	1.0753e+06	1/4:60,56	1/7:76,50	3/1:30,28	1/2:64,41	9/3:19,11	3/1:41,37	4/2:40,30	3/1:10,7	2/4:360,187	9/9:33	1/4:10,8	2/7:19,15	7/2:86,30	1/3:57,19	1/2:22,12		1/4:165,159	2/3:16,9
B37-28 × C56-11	Y312_057	1.0753e+06	3/4:66,49	7/3:38,35	3/2:37,30	4/2:45,44	1/9:23,11	3/2:34,31	4/4:42	1/4:11,10	2/1:314,297	9/1:33,25	1/4:13,11	7/5:14,9	7/1:70,66	1/3:48,20	1/2:18,15		4/1:144,142	3/2:7,7
B37-28 × C56-11	Y312_059	1.0753e+06	3/4:70,50	3/7:59,53	3/2:22,22	4/2:53,52	9/1:20,14	2/3:30,30	4/4:65	1/4:11,10	2/1:322,285	1/9:37,24	4/1:6,5	5/7:24,18	1/7:64,59	1/3:47,37	1/2:12,4		4/1:162,162	3/2:7,4
B37-28 × C56-11	Y312_062	1.0753e+06	4/3:69,69	7/3:66,62	3/2:45,41	4/2:57,56	1/9:19,14	3/2:45,39	4/4:62	1/4:6,4	2/1:367,343	9/1:51,38	4/1:3,3	7/5:17,15	1/7:66,55	1/3:56,27	2/1:10,10		1/4:163,152	2/3:11,10
B37-28 × C56-11	Y312_066	1.0753e+06	4/3:52,52	7/3:55,34	2/3:41,35	2/4:56,38	9/1:17,11	1/3:40,38	4/2:37,28	1/3:4,3	2/4:336,164	9/9:35	4/1:6,6	2/7:18,14	7/2:67,37	1/3:53,27	2/1:11,10		4/1:147,140	2/3:10,6
B37-28 × C56-11	Y312_071	1.0753e+06	3/4:70,58	3/7:73,67	3/2:46,40	4/2:70,49	1/9:18,17	2/3:66,42	4/4:55	4/1:4,2	2/1:322,303	1/9:44,35	4/1:2,1	5/7:22,18	7/1:71,52	1/3:65,21	2/1:5,2		4/1:177,176	3/2:13,6
B37-28 × C56-11	Y312_073	1.0753e+06	4/1:67,52	7/1:54,50	3/1:43,41	1/2:59,56	9/3:20,17	1/3:44,37	4/2:57,27	1/3:12,5	2/4:359,191	9/9:41	4/1:9,5	2/7:27,16	7/2:65,35	1/3:51,32	1/2:13,9		4/1:175,169	2/3:8,6
B37-28 × C56-11	Y312_080	1.0753e+06	1/4:72,46	1/7:58,36	3/1:30,23	2/1:50,42	9/3:24,19	3/1:33,31	4/2:39,38	3/1:1,1	2/4:312,167	9/9:28	4/1:1,1	7/2:18,16	7/2:56,21	1/3:44,25	2/1:3,3		1/4:164,137	3/2:8,5
B37-28 × C56-11	Y312_084	1.0753e+06	3/4:82,59	3/7:75,74	3/2:47,29	2/4:66,55	9/1:23,12	2/3:49,37	4/4:65	4/1:5,1	2/1:368,364	1/9:40,34	4/1:2,2	5/7:25,17	7/1:60,55	1/3:49,22	2/1:3,3		4/1:187,187	3/2:7,7
B37-28 × C56-11	Y312_091	1.0753e+06	1/4:72,57	7/1:62,54	3/1:49,41	2/1:72,68	9/3:22,15	3/1:36,35	4/2:61,42	1/3:11,10	2/4:351,205	9/9:35	4/1:10,10	2/7:24,12	1/7:85,72	1/3:62,34	2/1:14,4		1/4:174,131	2/3:13,6
B37-28 × C56-11	Y312_093	1.0753e+06	4/1:61,60	7/1:62,42	3/1:44,29	1/2:56,51	9/3:21,17	3/1:51,28	4/2:47,39	3/1:8,7	2/4:341,212	9/9:28	1/4:5,1	2/7:19,15	7/2:92,41	1/3:31,20	2/1:9,6		1/4:173,163	2/3:8,5
B37-28 × C56-11	Y312_096	1.0753e+06	4/3:53,53	3/7:65,61	3/2:30,28	4/2:62,47	1/9:22,12	2/3:51,32	4/4:60	1/4:13,11	2/1:328,324	9/1:36,21	4/1:16,9	5/7:17,6	7/1:74,70	1/3:60,26	1/2:18,14		1/4:162,129	3/2:6,6
B37-28 × C56-11	Y519_133	1.0753e+06	3/4:85,67	3/7:72,70	3/2:44,37	2/4:60,47	1/9:24,22	3/2:40,36	4/4:52	1/4:5,1	1/2:313,303	9/1:41,35	1/4:2,1	7/5:21,17	7/1:64,44	1/3:61,32	2/1:3,2		4/1:167,158	2/3:16,8
B37-28 × C56-11	Y519_135	1.0753e+06	1/4:66,46	7/1:67,45	1/3:34,29	1/2:54,42	9/3:17,15	3/1:39,38	4/2:45,26	1/3:7,1	2/4:290,165	9/9:31	4/1:1,1	7/2:17,14	7/2:56,26	1/3:48,27	2/1:7,6		1/4:152,137	3/2:6,5
B37-28 × C56-11	Y519_138	1.0753e+06	4/3:72,72	3/7:77,54	2/3:58,44	4/2:78,58	9/1:27,20	2/3:50,40	4/4:62	1/4:8,7	1/2:405,394	1/9:45,41	4/1:9,6	5/7:25,12	1/7:102,85	1/3:69,30	2/1:10,9		1/4:199,168	3/2:10,7
B37-28 × C56-11	Y519_140	1.0753e+06	3/4:82,47	3/7:57,46	2/3:42,38	2/4:54,46	9/1:17,15	2/3:44,36	4/4:68	1/4:10,3	2/1:336,312	9/1:38,21	4/1:5,4	7/5:20,14	7/1:67,59	1/3:55,19	1/2:4,3		1/4:181,130	3/2:10,8
B37-28 × C56-11	Y519_144	1.0753e+06	3/4:66,50	3/7:52,48	3/2:35,20	2/4:73,52	1/9:23,15	3/2:44,40	4/4:54	4/1:8,6	2/1:357,333	9/1:29,29	4/1:13,5	5/7:19,18	1/7:84,81	1/3:58,26	2/1:17,13		1/4:148,132	3/2:6,4
B37-28 × C56-11	Y519_146	1.0753e+06	1/4:27,23	1/7:27,25	3/1:17,12	1/2:26,25	3/9:8,8	1/3:19,17	4/2:27,11	1/3:10,9	2/4:172,88	9/9:14	4/1:8,3	2/7:9,8	7/2:37,13	1/3:24,11	2/1:7,3		1/4:85,67	3/2:7,2
B37-28 × C56-11	Y519_147	1.0753e+06	4/3:70,54	7/3:62,57	2/3:54,38	2/4:62,53	1/9:15,13	2/3:31,26	4/571:39,2	4/1:12,7	2/4:313,192	9/9:32	4/1:7,4	2/7:11,10	7/2:78,36	1/3:46,26	2/1:10,8		1/4:168,157	2/3:9,8
B37-28 × C56-11	Y519_148	1.0753e+06	3/4:70,60	3/7:61,55	3/2:38,25	2/4:53,47	9/1:17,11	2/3:32,32	4/4:38	1/4:10,6	1/2:406,374	1/9:34,30	4/1:12,7	7/5:18,16	7/1:79,74	1/3:67,28	1/2:12,9		4/1:182,157	3/2:5,4
B37-28 × C56-11	Y519_149	1.0753e+06	1/4:65,60	1/7:65,47	1/3:49,47	1/2:78,64	9/3:29,16	3/1:51,38	4/2:56,39	1/3:12,9	2/4:434,235	9/9:61	4/1:10,5	2/7:17,10	7/2:77,38	1/3:60,44	2/1:21,14		1/4:189,167	3/2:10,8
B37-28 × C56-11	Y519_153	1.0753e+06	4/3:65,59	3/7:70,59	3/2:35,31	2/4:66,60	1/9:25,23	2/3:40,40	4/4:55	4/1:9,4	2/1:338,316	9/1:32,30	4/1:2,2	5/7:17,9	1/7:87,85	1/3:52,30	2/1:9,7		4/1:166,157	2/3:15,9
B37-28 × C56-11	Y519_154	1.0753e+06	3/4:67,42	7/3:51,47	3/2:34,30	2/4:49,49	9/1:22,11	2/3:28,26	4/4:46	1/4:16,12	1/2:307,291	9/1:29,18	4/1:14,10	5/7:23,11	7/1:79,74	1/3:42,23	2/1:16,16		1/4:140,138	3/2:12,8
B37-28 × C56-11	Y519_155	1.0753e+06	1/4:68,52	7/1:57,40	3/1:38,28	1/2:50,43	9/3:21,19	3/1:40,23	2/4:51,35	3/1:7,5	2/4:332,170	9/9:27	4/1:7,4	7/2:14,12	7/2:71,37	1/3:55,29	2/1:8,4		4/1:159,138	2/3:8,7
B37-28 × C56-11	Y519_161	1.0753e+06	3/4:75,59	3/7:61,56	2/3:36,29	4/2:76,49	9/1:22,18	3/2:44,38	4/4:64	1/4:8,5	1/2:359,348	9/1:34,31	1/4:4,3	5/7:25,9	7/1:77,55	1/3:52,26	2/1:4,3		4/1:170,164	2/3:8,6
B37-28 × C56-11	Y519_162	1.0753e+06	3/4:60,53	3/7:63,48	3/2:28,19	4/2:62,47	9/1:14,10	2/3:35,29	4/4:40	1/4:23,16	1/2:322,307	1/9:33,29	1/4:21,18	5/7:14,13	7/1:73,68	1/3:52,27	2/1:26,21		1/4:141,127	3/2:6,4
B37-28 × C56-11	Y519_166	1.0753e+06	3/4:63,44	7/3:53,44	2/3:37,28	4/2:56,44	9/1:15,12	2/3:38,34	4/4:42	4/1:13,13	2/1:291,274	9/1:39,23	1/4:6,4	5/7:14,14	1/7:75,60	1/3:42,23	2/1:6,5		4/1:152,147	3/2:9,8
B37-28 × C56-11	Y519_167	1.0753e+06	4/1:39,25	7/1:27,24	3/1:21,19	1/2:32,31	3/9:11,6	3/1:31,21	2/4:29,20	3/1:23,16	2/4:244,149	9/9:19	4/1:36,34	2/7:9,9	7/2:56,21	1/3:30,11	2/1:24,20		1/4:100,87	3/2:4,2
B37-28 × C56-11	Y519_168	1.0753e+06	1/4:41,32	1/7:49,36	3/1:28,27	2/1:34,33	3/9:19,12	3/1:26,20	4/2:47,25	3/1:22,16	2/4:295,213	9/9:25	4/1:53,29	7/2:14,11	7/2:79,34	1/3:42,18	1/2:37,33		4/1:117,111	3/2:6,6
B37-28 × C56-11	Y519_170	1.0753e+06	1/4:50,43	7/1:53,47	1/3:28,28	1/2:52,42	9/3:14,8	3/1:43,33	4/2:45,38	3/1:33,24	2/4:290,188	9/9:16	4/1:37,35	2/7:18,14	7/2:61,31	1/3:37,18	2/1:36,32		1/4:146,123	3/2:5,4
B37-28 × C56-11	Y519_171	1.0753e+06	1/4:36,29	1/7:32,28	1/3:21,17	2/1:36,25	9/3:12,7	1/3:29,18	4/2:27,12	3/1:17,14	2/4:233,138	9/9:21	4/1:42,24	2/7:14,9	7/2:51,23	1/3:27,18	2/1:32,28		4/1:87,87	3/2:6,4
B37-28 × C56-11	Y519_173	1.0753e+06	1/4:61,52	7/1:57,46	1/3:43,29	2/1:59,43	9/3:20,10	1/3:42,30	4/2:39,38	1/3:37,20	2/4:338,212	9/9:25	1/4:40,38	2/7:14,14	7/2:97,37	1/3:45,24	1/2:45,42		1/4:168,141	3/2:9,7
B37-28 × C56-11	Y519_174	1.0753e+06	1/4:64,60	7/1:62,50	3/1:34,29	1/2:65,54	9/3:24,15	1/3:42,38	4/4:52	1/4:25,22	2/1:384,374	1/9:33,31	1/4:26,21	5/7:21,16	1/7:94,85	1/3:48,15	2/1:24,21		4/1:151,147	2/3:10,7
B37-28 × C56-11	Y519_176	1.0753e+06	4/1:57,56	1/7:67,57	1/3:44,38	1/2:54,50	9/3:21,15	3/1:52,30	4/2:59,34	3/1:19,14	2/4:355,228	9/9:32	4/1:18,14	2/7:17,12	7/2:85,42	1/3:48,23	1/2:31,25		1/4:168,158	3/2:9,5
B37-28 × C56-11	Y519_177	1.0753e+06	1/4:49,45	7/1:62,52	1/3:30,27	1/2:54,46	9/3:22,12	3/1:36,33	4/2:45,29	1/3:21,20	2/4:382,211	9/9:29	1/4:29,28	2/7:30,16	7/2:91,42	1/3:48,27	2/1:36,33		1/4:151,143	3/2:7,6
B37-28 × C56-11	Y519_199	1.0753e+06	3/4:67,53	3/7:81,71	3/2:56,37	2/4:59,57	9/1:21,13	3/2:51,43	4/4:60	4/1:6,6	1/2:399,376	1/9:42,27	4/1:4,2	5/7:36,15	7/1:90,85	1/3:74,36	2/1:8,4		1/4:221,174	3/2:11,10
B37-28 × C56-11	Y533_074	1.0753e+06	3/4:60,56	7/3:60,54	2/3:41,34	2/4:61,59	1/9:16,14	3/2:29,28	4/4:65	4/1:29,18	2/1:397,392	9/1:30,28	4/1:30,23	5/7:24,12	1/7:101,94	1/3:49,16	2/1:25,21		4/1:166,159	2/3:10,8
B37-28 × C56-11	Y533_081	1.0753e+06	1/4:56,41	7/1:53,47	3/1:28,22	1/2:72,54	3/9:11,10	1/3:40,34	2/4:33,29	1/3:29,24	2/4:347,212	9/9:36	4/1:32,29	2/7:18,9	7/2:105,46	1/3:52,8	1/2:40,34		1/4:165,138	3/2:6,2
B37-28 × C56-11	Y533_082	1.0753e+06	1/4:58,48	1/7:49,47	3/1:54,37	1/2:43,41	3/9:18,14	1/3:38,38	4/2:45,41	3/1:21,18	2/4:378,208	9/9:39	4/1:39,29	2/7:19,10	7/2:103,47	1/3:47,23	2/1:31,27		1/4:152,145	3/2:10,4
B37-28 × C56-11	Y533_085	1.0753e+06	3/4:90,79	7/3:76,65	2/3:45,34	4/2:71,56	9/1:20,19	2/3:41,41	4/4:84	408/4:1,1	2/1:289,268	9/1:53,45	4/4:2	5/7:42,22	7/1:37,35	1/3:78,32	2/1:3,2		1/4:209,192	3/2:7,6
B37-28 × C56-11	Y533_091	1.0753e+06	1/4:62,61	7/1:69,67	3/1:35,32	2/1:67,51	9/3:23,16	3/1:43,41	4/2:48,36	3/1:19,16	2/4:379,223	9/9:30	1/4:19,15	7/2:19,14	7/2:109,36	1/3:50,33	2/1:29,21		4/1:151,149	2/3:12,4
B37-28 × C56-11	Y533_092	1.0753e+06	1/4:56,51	7/1:58,42	3/1:32,23	1/2:56,43	1/9:19,9	3/2:38,28	4/4:49	1/4:42,36	1/2:331,318	9/1:29,24	1/4:62,46	5/7:18,15	7/1:89,84	1/3:46,23	1/2:30,25		1/4:171,129	2/3:7,6
B37-28 × C56-11	Y533_095	1.0753e+06	3/4:78,58	7/3:70,61	3/2:50,38	2/4:76,75	9/1:24,20	3/2:34,32	4/4:72	4/1:22,16	1/2:428,411	9/1:46,37	1/4:29,13	5/7:35,13	7/1:114,113	1/3:46,28	2/1:27,18		1/4:213,201	2/3:9,5
B37-28 × C56-11	Y533_098	1.0753e+06	4/1:75,67	7/1:86,53	1/3:48,40	1/2:59,44	9/3:21,16	3/1:51,46	4/2:68,37	1/3:13,7	2/4:431,262	9/9:29	4/1:17,13	2/7:31,12	7/2:126,40	1/3:45,30	1/2:21,16		4/1:179,178	2/3:7,5
B37-28 × C56-11	Y533_111	1.0753e+06	1/4:61,56	1/7:60,51	1/3:42,33	1/2:44,34	9/3:14,13	1/3:42,35	4/2:49,24	1/3:30,24	2/4:385,234	9/9:26	4/1:38,34	7/2:18,16	7/2:100,44	1/3:51,16	1/2:40,27		1/4:180,156	3/2:9,4
B37-28 × C56-11	Y533_112	1.0753e+06	1/4:63,60	7/1:47,46	1/3:40,36	1/2:66,60	9/1:13,10	3/2:41,38	4/4:58	4/1:17,16	1/2:396,373	9/1:50,43	1/4:25,22	5/7:19,17	1/7:99,95	1/3:49,24	2/1:43,27		1/4:196,131	2/3:12,10
B37-28 × C56-11	Y533_114	1.0753e+06	1/4:71,59	1/7:62,55	1/3:44,44	1/2:68,62	9/3:19,18	3/1:44,39	4/2:56,33	3/1:15,14	2/4:458,225	9/9:31	4/1:17,11	7/2:18,13	7/2:106,43	1/3:49,27	1/2:29,27		1/4:174,173	2/3:8,6
B37-28 × C56-11	Y533_116	1.0753e+06	3/4:86,73	7/3:80,67	3/2:41,33	2/4:84,67	9/1:21,21	2/3:41,41	4/4:51	4/1:18,13	1/2:438,427	9/1:35,32	4/1:20,20	7/5:20,19	7/1:109,92	1/3:57,26	1/2:26,21		1/4:187,174	3/2:16,8
B37-28 × C56-11	Y533_119	1.0753e+06	4/1:55,54	1/7:46,46	3/1:42,28	1/2:51,39	9/3:13,12	1/3:40,28	4/2:35,32	1/3:25,20	2/4:362,209	9/9:28	4/1:43,39	2/7:26,10	7/2:92,51	1/3:32,23	2/1:47,26		1/4:166,149	3/2:8,6
B37-28 × C56-11	Y533_122	1.0753e+06	4/3:72,63	7/3:60,51	2/3:41,39	4/2:66,64	9/1:18,10	2/3:31,25	4/4:68	4/1:28,27	1/2:433,397	1/9:39,34	1/4:35,33	5/7:25,18	1/7:105,101	1/3:37,25	2/1:38,32		4/1:201,184	2/3:14,3
B37-28 × C56-11	Y533_123	1.0753e+06	3/4:55,51	3/7:65,65	3/2:39,31	2/4:75,54	1/9:26,12	2/3:43,34	4/4:65	4/1:45,29	2/1:417,411	9/1:31,22	4/1:59,54	5/7:25,11	7/1:94,88	1/3:59,19	2/1:57,46		4/1:200,183	3/2:10,5
B37-28 × C56-11	Y533_124	1.0753e+06	3/4:52,51	3/7:54,44	2/3:40,35	2/4:60,47	1/9:16,13	3/2:46,40	4/4:48	1/4:42,29	2/1:392,368	9/1:36,22	4/1:42,41	5/7:12,7	7/1:102,93	1/3:40,21	1/2:36,27		1/4:156,149	3/2:11,5
B37-28 × C56-11	Y533_125	1.0753e+06	4/3:60,59	7/3:56,44	2/3:48,38	4/2:61,58	9/1:13,13	2/3:44,36	4/4:60	4/1:23,19	1/2:388,366	9/1:32,32	4/1:37,18	5/7:21,13	1/7:113,91	1/3:55,26	2/1:34,30		1/4:176,173	2/3:11,9
B37-28 × C56-11	Y533_132	1.0753e+06	4/3:65,62	3/7:60,55	3/2:49,40	2/4:62,55	9/1:23,20	3/2:39,31	4/4:40	1/4:18,15	2/1:415,404	9/1:44,36	4/1:22,22	7/5:23,22	7/1:97,91	1/3:52,33	2/1:21,19		4/1:180,165	2/3:16,7
B37-28 × C56-11	Y533_135	1.0753e+06	3/4:101,75	3/7:89,83	3/2:60,53	2/4:59,55	9/1:18,18	2/3:46,29	4/4:69	1/4:5,4	2/1:418,365	9/1:56,39	4/1:1,1	7/5:26,23	7/1:83,68	1/3:72,33	1/2:11,6		4/1:223,217	3/2:17,13
B37-28 × C56-11	Y533_136	1.0753e+06	3/4:67,53	3/7:56,38	2/3:37,30	2/4:44,44	1/9:23,15	3/2:42,34	4/4:51	4/1:38,25	1/2:392,376	9/1:34,24	1/4:38,37	5/7:24,16	1/7:101,92	1/3:55,26	2/1:33,31		1/4:192,142	3/2:8,5
B37-28 × C56-11	Y533_144	1.0753e+06	3/4:70,68	3/7:72,47	2/3:30,27	4/2:62,60	9/1:15,15	2/3:48,29	4/4:59	4/1:25,16	2/1:405,390	1/9:32,30	1/4:22,21	7/5:22,14	7/1:119,87	1/3:51,28	2/1:33,20		1/4:188,153	3/2:7,5
B37-28 × C56-11	Y533_145	1.0753e+06	3/4:60,42	7/3:57,39	3/2:37,36	2/4:54,39	9/1:22,19	3/2:29,26	4/4:45	4/1:33,32	1/2:373,361	1/9:28,27	1/4:33,28	7/5:20,17	7/1:120,82	1/3:45,22	1/2:31,27		1/4:155,152	3/2:10,4
B37-28 × C56-11	Y533_150	1.0753e+06	3/4:54,33	3/7:52,43	2/3:27,21	4/2:49,37	9/1:13,8	3/2:29,28	4/4:20	4/1:29,26	1/2:242,224	1/9:22,14	1/4:58,43	7/5:13,9	7/1:81,55	1/3:40,11	2/1:27,18		4/1:98,92	2/3:13,4
B37-28 × C56-11	Y533_153	1.0753e+06	4/3:61,47	7/3:52,36	3/2:35,26	2/4:65,55	9/1:14,14	3/2:48,37	4/4:29	4/1:28,28	2/1:353,310	1/9:27,18	1/4:37,35	5/7:16,12	7/1:97,68	1/3:41,26	1/2:31,26		4/1:148,135	2/3:9,7
B37-28 × C56-11	Y533_156	1.0753e+06	1/4:50,40	1/7:49,40	3/1:28,19	2/1:55,51	9/3:14,9	3/1:36,33	4/2:40,32	3/1:31,26	2/4:322,190	9/9:25	4/1:53,41	7/2:20,16	7/2:98,39	1/3:33,11	2/1:42,28		1/4:150,134	2/3:9,2
B37-28 × C56-11	Y533_160	1.0753e+06	1/4:59,46	7/1:54,48	1/3:32,32	1/2:50,43	9/3:16,14	1/3:31,27	4/2:58,36	1/3:32,22	2/4:335,199	9/9:33	1/4:28,23	2/7:18,16	7/2:101,44	1/3:35,16	2/1:39,28		4/1:157,153	3/2:7,6
B37-28 × C56-11	Y533_161	1.0753e+06	1/4:70,65	1/7:61,61	3/1:40,39	2/1:59,57	3/9:22,17	1/3:40,31	4/2:64,48	1/3:6,5	2/4:367,233	9/9:47	4/32:4,1	2/7:28,18	7/2:62,31	1/3:71,28	2/1:5,4		1/4:191,182	3/2:10,10
B37-28 × C56-11	Y533_176	1.0753e+06	1/4:84,75	7/1:81,74	3/1:48,45	2/1:48,46	3/9:23,21	1/3:30,19	4/2:101,62	1/79:2,1	2/4:199,97	9/9:55	4/4:1	2/7:28,26	7/2:25,13	1/3:83,33	1/372:2,1		4/1:191,174	3/2:12,10
B37-28 × C56-11	Y533_185	1.0753e+06	4/1:75,67	7/1:104,69	1/3:51,45	1/2:68,55	9/3:28,19	3/1:42,37	4/4:94	1/749:2,1	2/1:347,286	9/1:45,44	4/15:1,1	5/7:37,26	7/1:43,34	1/3:73,26	2/1:2,2		1/4:216,211	2/3:8,7
B37-28 × C56-11	Y533_186	1.0753e+06	3/4:97,79	3/7:101,81	2/3:53,47	2/4:61,49	1/9:21,10	3/2:38,33	4/4:80	4/1:1,1	2/1:222,208	9/1:54,51	4/4:1	5/7:31,23	7/1:32,28	1/3:66,30	1/192:1,1		1/4:209,186	3/2:12,9
B37-28 × C56-11	Y533_194	1.0753e+06	1/4:132,109	7/1:136,129	3/1:69,67	1/2:30,25	9/3:27,24	1/3:21,12	4/2:156,92	1/1:1	1/2:71,69	9/1:93,86	1/1:1	5/7:49,37	7/1:6,5	1/3:128,45	2/2:1		1/4:180,149	3/2:13,11
B37-28 × C56-11	Y533_197	1.0753e+06	1/4:58,44	1/7:61,47	1/3:43,36	2/1:70,61	3/9:16,13	1/3:29,18	4/2:42,33	3/1:25,22	2/4:381,201	9/9:40	4/1:29,19	5/7:20,11	7/1:106,90	1/3:48,23	1/2:26,18		1/4:164,151	3/2:8,6
B37-28 × C56-11	Y533_198	1.0753e+06	4/1:59,49	7/1:53,46	1/3:39,31	2/1:53,50	9/3:17,10	1/3:30,28	4/2:64,40	1/3:26,19	2/4:412,212	9/9:27	4/1:37,27	2/7:18,13	7/2:90,36	1/3:43,24	1/2:27,22		1/4:180,167	2/3:13,5
B37-28 × C56-11	Y533_200	1.0753e+06	4/1:51,41	1/7:53,36	3/1:30,28	2/1:52,42	3/9:11,7	3/1:31,17	4/2:31,21	1/3:34,24	2/4:302,172	9/9:37	4/1:42,37	2/7:19,17	7/2:111,34	1/3:43,22	1/2:41,40		1/4:154,137	3/2:8,6
B37-28 × C56-11	Y533_205	1.0753e+06	4/1:30,22	7/1:28,14	3/1:21,14	2/1:34,30	9/3:14,7	1/3:12,12	4/2:25,23	3/1:14,11	2/4:175,104	9/9:28	4/1:14,14	7/2:12,8	7/2:50,16	1/3:22,14	2/1:19,16		4/1:97,90	3/2:3,2
B37-28 × C56-11	Y533_211	1.0753e+06	1/4:63,43	7/1:44,41	3/1:42,32	2/1:60,48	9/3:15,13	3/1:37,32	4/2:53,25	3/1:25,22	2/4:362,167	9/9:24	4/1:31,29	2/7:19,14	7/2:107,36	1/3:48,16	2/1:33,27		1/4:149,140	2/3:10,5
B37-28 × C56-11	Y533_214	1.0753e+06	3/4:117,98	3/7:112,96	3/2:67,51	4/2:66,38	1/9:34,25	2/3:36,36	4/4:89	4/1:4,3	2/4:226,111	9/9:60	1/1:1	7/2:28,23	7/2:37,8	1/3:86,48	2/628:1,1		1/4:256,242	3/2:7,6
B37-28 × C56-11	Y533_216	1.0753e+06	4/3:64,55	3/7:70,47	2/3:44,38	4/2:64,46	1/9:18,16	2/3:36,30	4/4:81	1/4:35,27	1/2:451,425	9/1:32,25	4/1:37,31	5/7:30,17	7/1:108,102	1/3:56,35	2/1:35,23		1/4:170,151	3/2:6,3
B37-28 × C56-11	Y533_217	1.0753e+06	3/4:54,43	3/7:44,31	3/2:29,27	2/4:57,48	1/9:12,11	3/2:32,24	4/4:43	4/1:23,19	2/1:378,360	9/1:30,27	1/4:33,29	5/7:16,11	7/1:88,73	1/3:34,12	2/1:24,22		1/4:157,133	2/3:8,2
B37-28 × C56-11	Y533_218	1.0753e+06	3/4:57,47	3/7:46,46	3/2:53,23	4/2:44,43	9/1:28,15	2/3:31,28	4/4:46	1/4:27,24	1/2:443,424	9/1:35,28	4/1:42,41	5/7:21,18	1/7:98,87	1/3:50,18	2/1:38,35		4/1:178,162	2/3:11,9
B37-28 × C56-11	Y533_219	1.0753e+06	3/4:82,67	7/3:76,71	3/2:45,44	4/2:71,54	9/1:19,16	2/3:38,27	4/4:79	4/1:7,5	2/1:437,372	9/1:47,41	1/4:6,1	7/5:23,20	7/1:81,72	1/3:68,34	2/1:13,7		4/1:215,214	3/2:10,6
B37-28 × C56-11	Y533_220	1.0753e+06	3/4:78,61	7/3:56,47	3/2:39,34	4/2:62,61	9/1:15,12	3/2:30,27	4/4:66	1/4:21,16	2/1:424,418	1/9:38,35	4/1:27,17	5/7:28,19	7/1:108,104	1/3:60,29	2/1:30,17		1/4:187,182	2/3:8,5
B37-28 × C56-11	Y533_226	1.0753e+06	1/4:53,44	7/1:45,33	3/1:36,29	2/1:52,47	9/3:13,12	3/1:37,19	4/2:60,22	1/3:39,32	2/4:314,191	9/9:27	4/1:53,44	2/7:18,12	7/2:95,52	1/3:36,23	1/2:39,23		4/1:139,136	2/3:8,6
B37-28 × C56-11	Y533_227	1.0753e+06	1/4:44,44	7/1:46,37	1/3:26,21	1/2:41,41	9/3:12,10	1/3:37,33	4/4:49	4/1:33,22	1/2:348,343	9/1:26,20	1/4:49,41	7/5:21,14	7/1:91,65	1/3:46,16	2/1:33,31		1/4:157,137	2/3:12,3
B37-28 × C56-11	Y533_240	1.0753e+06	3/4:52,47	7/3:64,54	3/2:27,24	2/4:68,48	9/1:18,17	3/2:31,29	4/4:50	1/4:36,32	2/1:379,370	9/1:37,27	4/1:45,41	5/7:19,14	7/1:97,85	1/3:46,18	1/2:43,35		4/1:178,162	2/3:10,6
B37-28 × C56-11	Y533_241	1.0753e+06	1/4:55,55	7/1:61,59	3/1:37,35	1/2:54,48	3/9:16,14	3/1:39,37	4/2:55,33	1/3:47,32	2/4:420,228	9/9:33	4/1:68,47	7/2:20,17	7/2:94,39	1/3:49,41	2/1:61,40		1/4:183,178	2/3:12,8
B37-28 × C56-11	Y533_245	1.0753e+06	1/4:49,34	1/7:47,42	1/3:29,27	1/2:44,43	3/9:9,8	3/1:19,17	4/2:40,24	3/1:22,21	2/4:285,162	9/9:23	4/1:53,49	2/7:11,7	7/2:95,23	1/3:41,21	2/1:37,28		4/1:108,104	3/2:7,5
B37-28 × C56-11	Y533_249	1.0753e+06	3/4:61,59	7/3:41,36	2/3:24,20	4/2:55,53	9/1:17,12	2/3:37,32	4/2:49,46	3/1:31,27	2/4:395,208	9/9:27	1/4:38,20	2/7:22,13	7/2:104,34	1/3:51,23	1/2:40,36		1/4:156,140	2/3:12,7
B37-28 × C56-11	Y533_250	1.0753e+06	4/3:57,49	7/3:64,60	3/2:29,22	4/2:51,49	9/1:15,12	2/3:39,26	4/4:44	1/4:33,25	2/1:381,377	9/1:50,21	1/4:49,44	5/7:29,15	7/2:117,46	1/3:51,24	1/2:39,30		4/1:155,153	2/3:4,2
B37-28 × C56-11	Y533_267	1.0753e+06	4/1:43,37	7/1:33,24	3/1:24,18	2/1:39,35	9/3:17,8	1/3:28,20	4/2:39,23	3/1:28,28	2/4:327,197	9/9:32	4/1:49,43	2/7:14,14	7/2:82,37	1/3:41,17	1/2:50,32		4/1:117,117	3/2:7,3
B37-28 × C56-11	Y533_268	1.0753e+06	4/1:47,38	1/7:43,40	3/1:40,23	2/1:49,46	9/1:16,14	2/3:28,25	4/4:47	4/1:30,29	2/1:380,363	1/9:27,23	1/4:42,38	5/7:18,13	7/1:105,93	1/3:35,24	2/1:35,33		1/4:146,142	2/3:13,6
B37-28 × C56-11	Y533_269	1.0753e+06	3/4:49,44	3/7:39,37	3/2:30,26	4/2:50,42	1/9:17,14	3/2:35,26	4/4:32	4/1:41,29	2/1:335,321	9/1:31,25	1/4:57,54	5/7:21,8	7/1:96,57	1/3:40,14	2/1:30,29		4/1:117,116	3/2:8,8
B37-28 × C56-11	Y533_271	1.0753e+06	3/4:61,50	7/3:58,52	3/2:34,34	2/4:53,52	9/1:19,19	3/2:36,32	4/4:46	4/1:35,25	2/1:362,332	9/1:38,32	4/1:50,37	5/7:14,12	7/1:92,80	1/3:45,20	2/1:42,41		4/1:148,143	3/2:12,7
B37-28 × C56-11	Y533_286	1.0753e+06	4/1:46,42	7/1:46,32	3/1:28,21	1/2:29,20	3/9:8,6	1/3:23,15	4/2:33,19	1/3:22,17	2/4:407,242	9/9:20	1/4:26,20	2/7:12,12	7/2:92,42	1/3:22,8	2/1:28,21		1/4:91,82	2/3:9,1
B37-28 × C56-11	Y533_287	1.0753e+06	3/4:42,33	7/3:50,38	3/2:46,29	2/4:23,18	1/9:12,7	3/2:22,14	4/4:29	1/4:23,19	2/1:384,346	9/1:28,24	4/1:38,24	7/5:16,12	1/7:81,79	3/1:16,16	2/1:27,26		4/1:105,91	2/3:8,5
B37-28 × C56-11	Y533_297	1.0753e+06	3/4:48,46	3/7:45,39	3/2:26,23	2/4:23,23	9/1:11,8	2/3:12,6	4/4:27	1/4:22,19	2/1:356,340	1/9:23,20	4/1:30,26	5/7:14,12	7/1:70,63	1/3:16,13	1/2:24,22		4/1:95,81	3/2:6,2
B37-28 × C56-11	Y533_302	1.0753e+06	4/1:46,40	1/7:36,34	1/3:25,23	1/2:33,17	9/3:10,4	3/1:13,9	4/2:23,20	1/3:31,13	2/4:376,232	9/9:24	4/1:37,20	2/7:13,10	7/2:64,34	1/3:22,14	2/1:35,29		1/4:102,91	2/3:4,3
B37-28 × C56-11	Y533_303	1.0753e+06	3/4:51,40	3/7:39,32	3/2:28,24	2/4:27,20	1/9:11,5	2/3:14,13	4/4:30	4/1:20,9	2/1:371,360	9/1:21,21	4/1:21,18	7/5:21,18	7/1:78,78	1/3:30,12	2/1:21,21		4/1:88,77	3/2:10,8
B37-28 × C56-11	Y533_190	466556	3/4:124,86	3/7:111,93	3/2:51,44	4/2:40,32	1/9:30,22	3/2:25,18	4/4:117	./.:0	2/1:143,135	9/1:71,71	4/4:1	5/7:37,31	7/1:14,10	1/3:95,29	1/890:2,1		4/1:211,211	3/2:10,8
B37-28 × C56-11	07_3509_108	368675	4/1:12,11	7/1:20,9	3/1:12,8	2/504:9,1	3/9:2,2	3/1:6,5	2/4:6,4	1/3:9,5	1/2:137,135	1/9:9,7	4/1:14,6	7/5:6,2	1/7:25,21	1/3:6,2	2/1:11,9		1/4:29,22	2/3:4,2
B37-28 × C56-11	07_3509_121	368675	4/23:18,16	7/3:20,13	3/2:13,12	4/2:10,6	1/9:3,1	3/2:6,2	4/247:8,1	1/4:5,4	2/1:159,130	1/9:11,9	4/1:4,3	7/5:6,3	7/1:27,15	1/3:12,2	2/1:7,6		4/1:38,35	2/335:6,1
B37-28 × C56-11	07_3509_135	368675	1/4:20,20	7/1:14,13	1/3:13,5	1/2:9,5	3/9:7,1	3/1:10,8	2/4:9,7	3/3:4	2/4:129,88	9/9:5	1/4:12,2	7/2:2,1	7/2:19,6	1/3:15,1	1/2:10,3		1/4:35,23	2/3:3,2
B37-28 × C56-11	07_3509_148	368675	23/3:21,18	7/3:23,15	2/3:11,10	2/4:12,8	9/1:8,2	2/3:7,7	4/4:15	4/1:6,1	2/4:130,97	9/9:7	1/4:3,1	2/7:7,6	7/2:23,4	1/3:12,8	2/1:8,2		1/4:32,21	3/398:4,1
B37-28 × C56-11	07_3509_152	368675	3/4:26,20	7/3:23,15	3/2:10,8	2/4:13,6	1/9:7,1	2/3:8,5	4/4:13	1/4:3,2	2/1:170,157	9/1:10,5	4/1:4,1	5/7:5,3	1/7:28,21	1/3:9,5	2/1:4,2		4/1:38,29	530/3:1,1
B37-28 × C56-11	07_3509_153	368675	4/3:15,15	7/3:17,13	3/2:12,10	4/2:6,4	1/9:7,3	3/254:5,1	4/569:11,1	4/1:4,1	2/1:146,135	1/9:10,3	4/75:1,1	5/7:4,4	1/7:20,17	1/3:7,5	2/1:7,7		1/4:27,22	3/2:4,4
B37-28 × C56-11	07_3509_157	368675	1/23:20,17	7/1:13,5	1/3:12,11	1/2:9,6	3/9:3,2	1/3:6,5	4/2:16,11	1/33:4,1	2/4:149,75	9/9:12	4/1:9,4	2/7:8,2	7/2:22,11	1/3:9,2	1/2:7,5		1/4:31,28	2/3:3,2
B37-28 × C56-11	07_3509_175	368675	1/4:18,14	7/1:12,11	1/3:12,8	2/1:5,4	9/9:2	3/1:5,4	2/4:9,9	1/3:4,3	2/4:157,94	9/672:2,1	4/1:3,3	2/7:2,2	7/2:23,6	1/3:10,5	1/2:3,2		4/1:31,25	200/200:1
B37-28 × C56-11	07_3509_20	368675	1/4:19,15	1/7:18,13	3/1:8,5	1/2:10,4	9/1:4,4	2/3:3,3	4/4:13	1/4:6,4	2/1:123,105	9/1:13,4	4/1:6,5	5/7:6,3	7/1:24,21	1/3:9,4	2/144:13,1		4/1:26,19	69/3:1,1
B37-28 × C56-11	07_3509_219	368675	4/3:22,22	7/3:15,13	2/3:13,8	4/2:11,8	47/9:2,1	2/3:7,3	4/631:12,1	1/4:5,4	2/1:148,121	9/1:6,5	4/1:3,2	7/5:5,3	1/7:23,16	1/3:11,9	1/2:10,7		1/4:37,30	3/2:2,2
B37-28 × C56-11	07_3509_39	368675	4/1:22,19	1/7:15,13	1/3:16,11	2/1:11,9	3/9:4,4	1/3:10,9	2/4:6,4	3/1:4,3	2/4:154,88	9/11:8,1	4/1:4,2	2/7:9,5	7/2:19,10	3/1:8,3	2/1:9,4		4/1:31,18	3/2:2,2
B37-28 × C56-11	07_3509_42	368675	4/1:24,20	1/7:23,13	3/1:12,6	2/1:13,6	3/9:5,2	3/1:6,3	4/2:16,14	3/1:3,1	2/4:198,115	9/9:6	1/1:2	7/2:8,6	7/2:25,11	1/3:13,7	1/2:7,4		1/4:53,42	3/2:2,2
B37-28 × C56-11	07_3509_44	368675	3/4:20,17	7/3:19,7	3/2:9,3	2/4:10,6	9/1:5,4	2/3:9,4	4/631:10,1	1/4:3,2	1/2:155,127	9/1:5,4	4/1:3,3	5/7:8,5	7/1:14,14	1/3:7,4	1/2:6,3		4/1:38,24	3/2:4,2
B37-28 × C56-11	07_3509_51	368675	4/1:19,15	7/1:16,9	3/1:10,7	1/2:11,5	3/9:7,4	1/3:9,5	4/2:18,8	3/1:8,4	2/4:158,75	9/9:5	4/1:4,4	7/182:2,1	7/2:19,13	1/3:8,5	2/1:4,2		4/1:29,27	3/321:4,1
B37-28 × C56-11	07_3509_66	368675	3/4:15,13	7/3:9,7	2/3:19,13	4/2:10,8	1/9:4,3	3/2:6,2	4/306:4,1	1/4:6,4	2/1:128,127	9/1:5,5	4/1:5,3	5/7:8,1	7/1:18,17	3/1:3,2	1/2:6,5		1/4:32,25	3/2:2,1
B37-28 × C56-11	07_3509_88	368675	1/4:25,12	7/1:22,15	3/1:14,10	1/2:15,10	9/3:7,2	1/3:13,3	4/2:16,11	1/1:1	2/4:166,90	9/9:5	4/1:3,2	2/753:6,1	7/2:28,12	1/3:11,8	1/2:9,4		4/1:37,37	104/440:1,1
B37-28 × C56-11	C84-015	368675	4/3:22,21	7/3:22,18	2/3:17,9	4/2:13,7	9/1:5,4	2/3:7,7	4/528:13,1	1/4:15,12	2/1:206,171	9/1:18,7	1/4:24,23	5/7:7,3	1/7:37,32	1/3:9,8	2/1:20,18		1/4:48,31	2/3:2,1
B37-28 × C56-11	C84-23	368675	4/3:29,29	3/7:28,20	3/2:20,13	4/2:18,9	1/9:9,4	3/2:9,7	4/4:20	4/1:27,10	2/1:247,243	9/1:15,6	1/4:28,24	5/7:5,2	7/1:46,34	1/3:15,9	2/1:17,14		1/4:47,41	3/3:3
B37-28 × C56-11	C84-26	368675	4/3:29,26	7/3:30,23	3/2:25,18	2/4:19,15	9/1:7,6	3/2:7,5	4/474:17,1	4/1:20,13	1/2:316,311	1/9:16,14	1/4:37,32	7/5:10,6	1/7:52,47	1/3:20,8	1/2:24,22		4/1:52,52	3/2:3,3
B37-28 × C56-11	C84-35	368675	4/3:32,28	7/3:35,18	3/2:19,14	2/4:19,15	1/9:5,4	2/3:9,8	4/422:18,1	4/1:27,20	2/1:237,222	9/1:13,9	4/1:36,25	5/7:8,7	1/7:56,40	1/3:16,8	2/1:22,19		4/1:57,43	3/2:6,3
B37-28 × C56-11	C84-44	368675	1/4:36,28	7/1:25,23	1/3:19,15	2/1:31,22	3/9:4,3	3/1:7,3	4/2:21,7	3/1:21,17	2/4:361,160	9/9:13	4/1:35,35	2/7:14,3	7/2:59,26	1/26:18,1	1/2:23,22		4/1:68,56	2/642:2,1
B37-28 × C56-11	Y312_008	368675	4/1:70,50	1/7:74,62	1/3:34,34	1/2:64,57	9/3:18,16	3/1:46,27	4/2:56,32	1/3:9,5	2/4:321,174	9/3:35,2	4/1:7,4	2/7:14,14	7/2:68,19	1/3:58,22	1/2:8,7		4/1:160,157	2/3:13,5
B37-28 × C56-11	Y312_018	368675	4/3:46,43	3/7:56,51	3/2:38,30	2/4:58,46	9/1:11,9	2/3:36,32	4/574:39,2	4/1:19,17	1/2:337,331	1/9:24,19	1/4:24,23	5/7:15,15	7/1:78,71	1/3:29,25	1/2:20,16		1/4:161,115	2/3:9,7
B37-28 × C56-11	Y312_043	368675	4/1:76,68	7/1:74,62	1/3:48,41	1/2:64,57	3/9:20,16	3/1:34,32	4/2:66,48	3/1:7,4	2/4:319,182	9/9:37	4/1:4,2	2/7:21,21	7/2:49,27	1/3:63,27	1/30:4,1		1/4:198,157	2/3:15,11
B37-28 × C56-11	Y312_052	368675	4/3:68,57	7/3:67,53	3/2:38,31	2/4:56,42	3/9:20,13	1/3:38,30	4/2:55,38	3/107:1,1	2/4:274,162	9/9:30	1/4:3,2	7/2:19,15	7/2:48,21	1/3:64,23	2/1:3,1		1/4:158,151	3/2:10,8
B37-28 × C56-11	Y312_054	368675	1/4:57,48	1/7:71,43	3/1:34,32	1/2:65,50	9/3:16,14	3/1:38,34	4/2:56,30	1/3:16,9	2/1:345,312	9/1:36,34	4/1:15,8	5/7:23,11	1/7:81,66	1/3:56,23	1/2:14,9		1/4:144,142	3/2:7,5
B37-28 × C56-11	Y312_058	368675	4/1:53,49	1/7:62,58	1/3:39,38	1/2:60,52	9/3:20,19	3/1:36,34	4/2:44,34	1/3:8,5	2/4:373,211	9/672:31,2	4/1:8,2	2/7:14,12	7/2:95,45	1/3:50,28	1/2:11,10		1/4:179,129	3/2:12,6
B37-28 × C56-11	Y312_064	368675	4/1:85,74	7/1:85,77	1/3:51,45	2/1:67,58	3/9:26,24	3/1:46,36	4/2:58,39	3/908:1,1	2/4:332,174	9/9:53	1/4:2,1	2/7:33,22	7/2:56,25	1/3:62,30	1/2:4,2		1/4:204,174	3/2:12,9
B37-28 × C56-11	Y312_085	368675	3/4:69,58	7/3:68,58	2/3:29,25	4/2:60,51	1/9:18,15	2/3:39,32	4/4:81	4/1:4,3	1/2:319,289	9/1:51,30	1/80:4,1	5/7:18,18	1/7:61,50	1/3:59,14	1/2:7,3		1/4:186,165	2/3:8,7
B37-28 × C56-11	Y312_099	368675	1/4:68,59	7/1:73,66	1/3:41,40	2/1:59,44	3/9:18,11	3/1:35,29	4/2:65,25	14/3:1,1	2/4:252,152	9/9:32	4/22:1,1	7/2:15,7	7/2:64,16	1/3:65,29	2/1:6,3		1/4:158,135	3/2:8,2
B37-28 × C56-11	Y519_137	368675	4/1:62,53	7/1:60,57	1/3:38,32	1/2:53,49	9/3:23,10	3/1:50,33	4/2:61,39	1/3:2,1	2/4:366,167	9/1:54,5	4/1:3,3	7/2:18,16	7/2:76,35	1/3:56,28	2/1:7,4		4/1:167,158	3/2:12,9
B37-28 × C56-11	Y519_143	368675	4/1:57,51	1/7:67,60	1/3:45,39	1/2:77,50	9/3:19,10	3/1:40,31	4/2:47,42	4/1:6,6	1/2:341,318	9/1:35,33	4/1:8,8	5/7:21,13	7/1:76,75	1/3:51,30	2/1:11,7		1/4:175,140	3/2:6,2
B37-28 × C56-11	Y519_150	368675	4/3:81,62	3/7:48,47	2/3:38,32	2/4:57,35	9/3:20,11	1/3:46,37	4/2:77,30	3/1:5,3	2/4:346,208	9/530:33,2	4/1:3,2	2/7:26,15	7/2:85,32	1/3:56,28	2/1:7,7		1/4:174,132	2/3:13,6
B37-28 × C56-11	Y519_152	368675	1/4:46,42	1/7:64,61	3/1:36,32	2/1:58,53	9/3:21,10	1/3:28,25	4/2:54,32	3/1:6,6	2/4:294,194	9/1:33,2	1/4:7,3	2/7:20,11	7/2:87,32	1/3:50,31	2/1:9,5		1/4:151,148	2/3:10,4
B37-28 × C56-11	Y519_159	368675	1/4:51,46	7/1:73,56	1/3:34,34	1/2:57,54	9/3:12,10	3/1:41,38	4/2:62,37	1/3:13,8	2/1:385,362	9/1:38,29	1/4:7,3	5/7:21,16	7/1:88,78	1/3:47,28	1/2:12,8		1/4:176,160	2/3:13,4
B37-28 × C56-11	Y519_164	368675	3/4:75,53	7/3:54,50	2/3:38,25	2/4:52,39	1/9:20,13	2/3:57,29	4/2:43,4	1/4:12,11	1/2:356,321	9/1:29,28	1/4:14,10	7/5:16,12	7/1:73,65	1/3:43,13	1/2:20,19		4/1:164,154	2/3:8,7
B37-28 × C56-11	Y533_072	368675	3/4:47,40	7/3:38,36	1/3:27,27	2/1:54,40	3/9:12,5	3/1:30,28	4/2:50,25	3/1:29,24	2/4:325,179	9/530:29,2	1/4:39,34	7/2:14,9	7/2:80,38	1/3:43,17	2/1:31,27		4/1:131,112	3/2:7,5
B37-28 × C56-11	Y533_168	368675	3/4:61,52	7/3:70,63	3/2:30,30	2/4:56,44	9/1:15,14	3/2:32,29	4/4:43	4/1:23,20	1/2:366,348	9/1:42,32	4/1:31,30	5/7:24,13	7/1:100,84	1/3:38,23	2/1:37,29		1/4:168,150	3/640:3,1
B37-28 × C56-11	Y533_175	368675	4/1:74,58	7/1:68,62	1/3:42,42	1/2:53,47	3/9:27,15	1/3:30,25	4/2:62,48	3/1:2,2	2/1:313,292	9/1:58,39	1/4:3,2	5/7:30,17	7/1:62,39	1/3:67,25	1/2:5,2		1/4:207,184	2/3:11,7
B37-28 × C56-11	Y533_228	368675	4/3:61,51	3/7:59,52	3/2:36,28	4/2:50,44	9/3:13,12	1/3:33,33	4/2:51,35	3/1:25,24	2/4:382,203	9/11:37,2	4/1:31,28	2/7:20,13	7/2:105,32	1/3:56,19	1/2:41,29		1/4:165,154	2/3:7,6
B37-28 × C56-11	Y533_230	368675	1/4:102,79	7/1:91,85	1/3:44,36	2/1:72,67	9/3:28,21	3/1:43,35	4/2:90,59	1/3:7,1	2/1:384,382	9/1:67,52	4/1:4,2	5/7:38,15	7/1:60,60	1/3:82,33	2/1:5,2		1/4:265,233	3/2:10,9
B37-28 × C56-11	Y533_231	368675	4/1:78,75	7/1:94,77	3/1:61,54	2/1:54,52	3/9:24,19	3/1:44,36	4/2:95,52	1/695:2,1	2/4:259,129	9/9:69	1/1:1	2/7:32,28	7/2:34,17	1/3:66,38	250/2:1,1		1/4:205,197	3/2:18,8
B37-28 × C56-11	Y533_235	368675	3/4:48,43	3/7:50,45	2/3:30,27	4/2:40,23	9/1:15,10	2/3:43,35	4/422:37,2	4/1:33,32	2/1:331,329	1/9:27,21	4/1:46,42	7/5:12,7	7/1:93,62	1/3:44,13	2/1:30,26		1/4:126,107	2/3:6,5
B37-28 × C56-11	Y533_277	368675	3/23:40,37	7/3:44,43	3/2:29,22	4/2:31,22	9/1:9,5	2/3:17,15	4/4:22	4/1:16,16	2/1:368,341	9/1:20,20	1/4:36,27	5/7:16,9	7/1:61,58	1/3:17,10	2/1:23,19		1/4:84,76	3/2:4,3
B37-28 × C56-11	Y533_288	368675	4/1:44,43	1/7:52,29	1/3:28,22	1/2:31,27	9/3:13,7	3/1:20,12	4/2:26,22	1/3:20,9	2/1:387,355	1/9:23,16	4/1:30,21	5/7:9,9	7/1:75,63	1/3:29,7	1/2:24,21		4/1:96,89	3/2:9,7
B37-28 × C56-11	Y533_289	368675	1/4:63,37	1/7:45,33	1/3:34,24	1/2:35,22	9/3:17,7	1/3:21,17	4/2:29,27	1/3:19,13	2/1:376,325	9/1:27,17	1/4:32,26	5/7:12,10	7/1:81,75	1/3:31,14	2/1:29,27		1/4:110,103	2/3:7,3
B37-28 × C56-11	Y533_083	251385	4/1:137,133	7/1:148,140	3/1:46,45	2/1:3,1	1/9:13,9	2/3:4,2	4/4:164	./.:0	2/1:2,1	9/1:86,83	./.:0	5/7:52,49	7/7:1	1/3:148,54	./.:0		4/1:34,33	3/2:9,3
B37-28 × C56-11	07_3509_123	124073	4/23:18,15	7/3:11,9	3/2:9,9	4/2:11,7	1/9:6,4	2/3:4,3	4/571:17,1	1/4:10,2	1/2:149,149	9/1:12,6	4/1:6,3	5/7:5,3	1/7:21,20	3/1:6,3	1/2:8,7		4/1:37,19	3/69:2,1
B37-28 × C56-11	07_3509_133	124073	1/23:19,18	7/1:19,18	3/1:13,8	1/2:8,6	3/9:3,3	3/1:5,2	4/2:12,11	3/1:5,5	2/4:141,93	9/9:6	1/4:11,10	2/7:6,4	7/2:27,12	1/3:9,2	1/2:10,4		4/1:38,23	3/396:3,1
B37-28 × C56-11	07_3509_206	124073	4/3:27,26	3/7:17,17	2/3:14,8	4/2:16,14	9/1:5,4	3/2:7,5	4/4:20	1/4:6,3	2/1:177,166	1/9:11,8	1/1:3	5/7:6,6	7/1:27,20	1/3:9,3	46/2:1,1		1/4:46,36	3/148:3,1
B37-28 × C56-11	07_3509_212	124073	4/3:21,21	3/7:22,13	2/3:16,8	4/2:13,7	1/9:2,1	2/3:7,7	4/384:19,1	4/1:6,2	2/1:166,135	1/9:9,2	4/1:10,6	5/7:4,3	7/1:28,22	1/3:7,5	1/2:10,3		1/4:36,31	3/65:4,1
B37-28 × C56-11	07_3509_58	124073	3/4:17,16	7/3:14,8	3/2:12,10	2/4:11,9	9/1:2,1	2/3:7,5	4/6:10,1	1/4:3,2	2/1:138,125	9/1:10,5	4/1:5,4	5/7:6,5	7/1:16,14	1/3:6,4	1/2:7,1		4/1:33,31	746/3:1,1
B37-28 × C56-11	07_3509_70	124073	4/3:19,11	7/3:14,9	2/3:16,7	2/4:12,5	1/9:4,2	2/3:10,5	4/574:10,1	4/1:6,5	2/1:145,122	9/1:2,2	1/4:11,7	7/5:3,2	1/7:19,14	1/444:6,1	1/2:9,4		4/1:28,23	369/2:1,1
B37-28 × C56-11	07_3509_83	124073	3/23:23,17	3/7:15,13	2/3:16,11	4/2:12,10	9/1:3,3	2/3:10,4	4/422:16,1	1/4:7,5	2/1:166,145	9/1:12,10	4/1:8,6	5/7:6,2	7/1:19,19	3/1:7,7	2/1:10,6		1/4:32,24	2/3:4,2
B37-28 × C56-11	07_3509_86	124073	3/23:17,11	3/7:22,11	3/2:10,10	2/4:6,4	1/9:7,5	2/3:7,5	4/247:13,1	4/1:5,5	2/1:150,128	1/9:12,5	1/4:11,1	5/7:7,4	1/7:22,14	3/1:7,7	1/2:9,8		1/4:27,22	3/2:2,1
B37-28 × C56-11	C84-55	124073	3/23:26,20	3/7:22,18	3/2:14,9	4/2:16,7	9/1:4,4	2/3:8,6	4/4:25	1/4:20,14	1/2:268,262	9/1:10,10	4/1:23,22	5/7:7,3	1/7:46,41	1/3:11,8	2/1:22,12		1/4:50,41	136/95:1,1
B37-28 × C56-11	Y519_132	124073	1/4:57,57	1/7:62,58	1/3:36,36	1/2:40,38	9/3:25,20	3/1:43,34	4/2:55,35	3/810:2,1	2/4:230,109	9/9:52	4/1:2,1	7/2:17,16	7/2:45,29	1/3:61,25	1/1:2		1/4:140,123	3/2:5,5
B37-28 × C56-11	Y533_093	124073	1/3:54,49	1/3:63,36	1/3:35,30	1/2:47,47	9/3:16,10	3/1:36,34	4/2:48,29	3/1:18,14	2/4:374,191	9/9:33	4/1:23,21	2/7:15,12	7/2:94,20	1/3:45,26	1/2:27,13		4/1:151,151	2/3:4,3
B37-28 × C56-11	Y533_166	124073	3/4:94,55	7/3:78,58	2/3:43,39	4/2:49,36	1/9:20,14	3/2:29,27	4/4:79	4/244:1,1	2/1:283,272	1/9:50,40	1/1:1	5/7:40,19	7/1:37,29	1/3:81,20	2/107:5,1		1/4:168,158	3/2:14,4
B37-28 × C56-11	Y533_285	124073	3/23:58,43	7/3:42,32	2/3:23,22	2/4:25,21	1/9:12,10	2/3:20,15	4/4:27	4/1:15,14	2/1:340,299	9/1:19,16	4/1:34,29	7/5:13,6	7/1:79,67	1/3:28,9	2/1:28,21		1/4:104,81	3/40:3,1
B37-28 × C56-11	Y533_188	69770.1	3/4:137,94	3/7:129,106	3/2:58,53	4/2:41,31	1/9:20,18	3/2:27,24	4/4:113	./.:0	2/1:82,73	1/9:80,70	./.:0	5/7:34,31	7/1:5,3	1/3:92,45	1/1:1		4/1:194,170	2/3:19,9
B37-28 × C56-11	07_3509_120	40861.2	23/1:12,9	1/7:17,10	1/3:7,6	2/1:4,2	9/3:5,4	3/349:5,1	4/369:5,1	1/4:6,4	1/2:152,128	1/9:7,6	4/1:11,8	5/7:5,3	7/1:18,14	1/3:7,6	2/1:11,8		4/1:33,23	3/283:3,1
B37-28 × C56-11	C84_37	40861.2	23/4:16,16	3/7:11,6	3/2:9,5	2/4:11,6	9/47:4,1	3/2:6,3	4/4:8	4/1:4,2	2/1:141,136	9/1:12,11	4/1:5,4	5/7:4,3	1/7:22,19	1/3:9,6	5/1:8,7		5/3:36,29	189/114:1,1
B37-28 × C56-11	Y519_141	40861.2	3/3:126	3/3:124	2/2:69	4/4:113	3/9:16,13	1/3:40,34	4/2:52,41	1/3:3,2	2/4:270,152	9/9:52	4/4:5	7/2:24,14	7/2:59,27	1/3:58,29	2/1:5,5		1/4:175,144	2/3:10,4
B37-28 × C56-11	Y520-131-08	40861.2	3/4:30,18	7/3:25,21	2/3:17,15	2/4:15,14	9/1:3,3	3/2:11,7	4/247:18,1	1/4:18,17	2/1:209,182	1/9:9,6	1/4:31,23	5/7:9,4	1/7:48,47	1/3:17,5	5/2:18,12		3/4:42,42	3/1:3,3
B37-28 × C56-11	Y533_191	40861.2	3/4:104,49	3/7:93,34	2/3:45,25	4/2:69,35	9/3:10,8	2/1:18,17	4/2:37,21	1/473:2,1	1/2:212,194	9/1:23,19	4/300:3,1	5/2:20,15	7/1:25,25	1/3:72,16	2/1:4,3		4/1:213,134	3/2:15,7
B37-28 × C56-11	Y533_203	38526.4	3/4:209,152	7/3:186,176	3/2:47,34	2/269:2,1	9/1:13,10	./.:0	4/4:248	./.:0	1/1:1	1/9:148,136	4/4:1	5/7:77,47	./.:0	1/3:188,48	./.:0		4/1:42,32	3/2:13,6
B37-28 × C56-11	07_3509_19	13123.8	1/4:17,8	1/7:10,8	3/1:16,6	1/13:6,1	9/3:3,1	1/144:4,1	2/4:7,6	1/3:3,2	2/4:110,84	9/9:5	4/1:6,2	2/2:3	7/2:25,8	3/1:5,4	1/2:6,3		1/4:24,15	526/3:1,1
B37-28 × C56-11	07_3509_205	13123.8	23/1:15,14	7/1:11,7	3/1:12,5	2/1:10,5	3/3:2	3/1:6,4	4/2:9,6	1/3:5,2	2/4:117,86	9/9:6	4/1:10,7	2/2:2	7/2:11,10	1/3:7,2	2/1:7,7		1/4:25,21	3/95:2,1
B37-28 × C56-11	07_3509_32	13123.8	1/23:24,17	7/1:13,11	3/1:13,10	2/1:11,3	1/9:8,2	2/3:7,7	4/527:7,1	4/214:2,1	2/1:169,144	1/9:8,6	1/4:4,2	5/7:5,4	7/1:27,22	1/3:8,7	2/1:8,5		4/1:35,31	532/3:1,1
B37-28 × C56-11	07_3509_33	13123.8	1/3:18,10	3/1:12,11	3/1:10,4	1/2:7,7	3/3:3	1/3:9,7	4/2:6,2	1/3:4,3	2/4:141,80	9/9:5	4/1:6,2	2/7:4,3	2/7:14,10	1/3:7,3	2/1:7,7		4/1:23,21	3/3:1
B37-28 × C56-11	Y519_134	13123.8	1/4:59,59	3/1:53,46	3/2:29,29	1/4:61,53	9/1:20,17	2/1:39,37	4/2:57,25	4/1:11,10	2/1:329,305	9/1:27,26	1/4:21,6	7/5:18,17	7/1:79,69	1/3:78,20	2/1:42,12		4/1:267,159	3/2:13,10
B37-28 × C56-11	Y533_087	13123.8	3/1:32,29	3/1:45,25	1/2:20,13	4/1:37,25	3/9:10,7	1/3:14,12	4/2:26,16	3/1:19,16	2/4:225,103	9/9:21	4/1:16,9	7/2:6,3	7/2:56,25	1/3:30,12	2/1:18,11		1/4:104,85	3/2:6,6
B37-28 × C56-11	Y533_187	10266.4	3/4:263,215	7/3:209,205	2/3:25,23	./.:0	9/1:8,4	3/3:2	4/4:227	564/564:1	1/6:2,1	9/1:139,112	./.:0	5/7:74,66	./.:0	1/3:176,105	1/1:1		1/4:20,16	3/2:6,3
B37-28 × C56-11	Y533_224	7727.26	1/4:195,173	7/1:185,150	3/1:44,30	2/1:2,1	3/9:10,6	3/455:2,1	4/2:265,168	262/250:1,1	1/1:1	9/9:137	./.:0	2/7:72,52	./.:0	1/3:199,59	459/459:1		1/4:30,27	2/3:8,6
Tamiami × Solbrio	TAMIAMI	1.0753e+06	4/1:21,17	7/3:33,19	1/3:12,10	1/2:16,16	9/1:5,4	3/2:3,1	4/4:14	3/1:19,9	2/1:193,178	9/1:16,5	4/1:17,12	1/7:5,3	7/1:32,28	1/3:16,3	1/5:17,10		1/3:32,24	2/2:5
Tamiami × Solbrio	TAMIAMI	368675	4/1:23,13	7/3:14,10	1/3:9,8	1/2:11,11	1/9:6,1	2/3:5,3	4/4:13	1/3:11,7	2/1:159,107	9/1:11,6	1/4:21,16	7/1:6,2	1/7:34,30	1/3:11,5	5/1:9,7		1/3:32,26	2/1:3,3
Tamiami × Solbrio	TAMIAMI	368675	1/4:44,38	7/3:46,45	3/1:41,32	2/1:32,30	1/9:13,7	3/2:14,12	4/4:28	1/3:37,35	2/1:417,350	9/1:16,13	1/4:55,42	1/7:15,9	7/1:86,86	1/3:30,13	1/5:46,25		1/3:77,76	1/2:8,5
Tamiami × Solbrio	TAMIAMI	368675	4/1:46,38	7/3:46,45	3/1:26,22	1/2:35,26	1/9:12,7	3/2:17,11	4/4:30	1/3:28,25	2/1:399,344	9/1:20,19	1/4:63,56	1/7:10,5	7/1:89,76	1/3:16,14	1/5:33,31		1/3:96,80	1/2:9,5
Tamiami × Solbrio	TAMIAMI	124073	1/4:20,17	3/7:27,19	1/3:15,12	2/1:20,17	9/1:6,5	3/2:5,3	4/383:9,1	1/3:18,12	2/1:227,166	1/9:13,5	1/4:24,10	1/7:5,2	7/1:42,39	1/3:11,6	1/5:14,9		1/3:38,32	1/2:7,2
Tamiami × Solbrio	TAMIAMI	124073	1/4:21,19	7/3:24,12	1/3:15,11	2/1:21,10	9/1:7,5	3/2:6,3	4/4:15	1/3:12,11	2/1:176,136	9/1:9,8	1/4:24,17	7/1:12,7	7/1:31,29	1/3:9,6	1/5:12,11		1/3:40,28	1/29:6,1
Tamiami × Solbrio	TAMIAMI	40861.2	4/1:13,12	3/7:13,12	3/1:17,8	2/1:11,4	1/9:3,2	2/3:4,3	4/4:28	3/1:9,5	2/1:224,201	1/9:21,16	4/1:13,10	1/7:4,3	7/1:5,4	1/78:17,1	1/5:16,9		3/1:41,38	47/281:1,1
Tamiami × Solbrio	TAMIAMI	40861.2	4/1:17,13	7/3:18,8	1/3:9,5	1/2:14,10	9/251:1,1	3/2:7,3	4/497:13,1	3/1:10,5	1/2:155,137	1/9:7,6	4/1:15,12	1/7:5,2	1/7:35,33	1/77:10,1	5/1:14,10		1/3:31,23	382/2:1,1
Tamiami × Solbrio	18MM913	466556	3/4:7,5	7/3:6,3	3/613:2,1	1/2:6,4	9/653:2,1	2/3:5,3	4/4:5	1/1:4	2/1:69,57	9/9:2	4/1:8,6	7/277:2,1	7/1:7,6	15/1:2,2	5/2:3,1		3/4:14,12	./.:0
Tamiami × Solbrio	18MM_531_103	368675	4/1:21,19	7/3:17,14	3/1:17,14	2/1:19,15	9/1:4,4	2/3:7,5	4/4:18	1/3:16,12	2/1:212,168	1/9:8,7	1/4:28,18	1/7:4,3	7/1:46,41	1/3:21,7	1/5:21,20		1/3:44,43	2/1:6,4
Tamiami × Solbrio	18MM_531_121	368675	1/4:11,11	1/7:10,10	3/1:7,4	2/1:11,8	9/3:4,2	6/3:6,4	4/2:9,3	1/1:22	2/4:116,62	9/9:3	4/1:15,15	2/7:5,3	7/2:22,6	3/1:3,3	5/2:8,4		4/3:25,17	3/1:3,2
Tamiami × Solbrio	18MM_531_154	368675	4/1:16,12	7/1:21,10	3/1:11,10	1/2:12,9	3/9:5,2	3/918:3,1	2/4:10,10	1/1:20	2/4:146,67	9/9:8	1/4:20,11	7/2:6,4	7/2:17,10	1/3:15,3	2/5:10,5		3/4:41,22	3/1:1,1
Tamiami × Solbrio	18MM_531_176	368675	4/1:21,11	7/1:13,11	1/3:11,8	1/2:20,9	9/3:5,4	3/532:2,1	4/2:17,11	1/1:25	2/4:167,90	9/9:8	4/1:31,14	2/7:6,4	7/2:18,14	1/3:9,3	2/5:10,9		3/4:39,33	3/1:4,3
Tamiami × Solbrio	18MM_531_33	368675	4/1:20,17	7/1:21,20	3/1:12,8	1/2:14,8	3/9:5,3	6/3:7,5	4/2:13,10	1/1:31	2/4:202,106	9/9:13	4/1:25,19	2/7:4,3	7/2:45,16	1/3:14,4	2/1:17,14		3/4:47,44	3/50:2,1
Tamiami × Solbrio	18MM_531_52	368675	4/1:16,13	7/1:23,21	3/1:15,9	1/2:24,20	9/3:9,5	6/3:7,3	4/2:17,12	1/1:30	2/4:208,98	9/9:15	4/1:14,14	7/2:6,5	2/7:28,27	1/3:11,9	5/2:24,11		3/4:43,38	28/3:2,2
Tamiami × Solbrio	18MM_531_60	368675	23/4:16,16	1/7:19,16	1/3:13,11	1/2:18,12	3/9:7,4	6/3:7,4	4/2:15,8	1/1:24	2/4:173,107	9/9:10	4/1:24,22	2/7:9,3	7/2:30,23	1/3:12,10	5/2:15,11		3/4:45,30	1/3:2,1
Tamiami × Solbrio	18MM_531_67	368675	1/4:27,24	7/1:23,17	3/1:12,7	2/4:12,12	1/9:5,3	3/601:6,1	4/2:16,10	1/1:28	2/4:214,92	9/9:7	1/4:26,16	2/7:5,5	7/2:27,11	1/3:12,4	5/2:15,9		4/3:39,30	1/81:2,1
Tamiami × Solbrio	18MM_531_74	368675	1/4:21,20	7/1:22,15	1/3:13,8	1/2:22,14	9/3:4,2	6/3:7,5	4/2:16,12	1/53:30,2	2/4:185,103	9/9:8	4/1:27,16	2/7:8,4	7/2:33,20	1/1:27	2/1:13,11		4/1:45,35	2/429:2,1
Tamiami × Solbrio	18MM_531_98	368675	4/23:19,17	7/1:18,17	1/3:14,10	2/1:12,11	9/3:5,3	3/6:5,3	4/2:10,5	1/1:28	2/4:182,104	9/9:6	4/1:16,13	2/7:6,4	7/2:41,19	1/3:11,4	5/2:18,13		3/4:36,32	3/363:2,1
Tamiami × Solbrio	18MM_532_130	368675	1/4:40,38	3/7:43,38	3/1:30,25	1/2:51,29	9/1:10,9	2/3:17,7	4/4:28	3/1:42,42	2/1:412,300	9/1:29,11	4/1:51,48	1/7:14,6	1/7:84,81	1/3:34,9	1/5:33,30		1/3:79,68	1/2:8,4
Tamiami × Solbrio	18MM_532_139	368675	4/1:36,30	7/1:41,39	1/3:28,27	1/2:27,24	3/9:8,5	6/3:15,9	4/2:24,17	1/1:57	2/4:357,214	9/9:21	1/4:61,45	2/7:13,5	7/2:74,34	1/3:26,12	5/2:40,32		3/4:74,73	1/3:8,5
Tamiami × Solbrio	18MM_532_14	368675	23/4:10,10	1/7:9,9	1/3:7,5	2/1:8,6	9/3:4,1	6/3:3,1	4/2:14,5	1/1:21	2/4:127,62	9/9:5	4/1:14,12	2/7:2,2	7/2:19,7	1/3:6,3	2/5:10,9		4/3:27,23	1/3:3,1
Tamiami × Solbrio	18MM_532_142	368675	1/4:32,32	1/7:38,35	1/3:28,24	1/2:39,30	9/3:13,6	6/3:11,8	4/2:31,19	1/1:61	2/4:394,224	9/9:19	4/1:52,42	2/7:17,7	7/2:79,42	1/3:24,15	2/5:51,29		4/3:91,74	3/1:3,2
Tamiami × Solbrio	18MM_532_153	368675	4/23:66,57	7/3:40,38	1/3:33,26	2/1:39,29	1/9:10,9	2/3:14,9	4/4:39	3/1:37,34	2/1:389,290	9/1:15,14	1/4:62,44	1/7:9,8	7/1:90,72	1/3:17,9	1/5:30,28		1/3:92,91	1/2:7,6
Tamiami × Solbrio	18MM_532_157	368675	4/23:53,39	7/1:54,43	3/1:33,28	2/1:41,30	9/3:10,7	6/3:15,10	4/2:35,22	1/1:48	2/4:403,219	9/9:23	1/4:56,46	2/7:15,7	7/2:79,43	1/3:28,10	2/5:28,24		4/3:69,67	3/1:3,3
Tamiami × Solbrio	18MM_532_158	368675	1/4:44,32	7/1:33,31	1/3:25,20	1/2:34,26	9/3:10,8	6/3:16,5	2/4:19,15	1/1:63	2/4:343,214	9/9:23	4/1:52,44	7/2:9,4	7/2:62,40	1/3:19,10	2/5:25,24		3/4:91,67	3/1:7,6
Tamiami × Solbrio	18MM_532_169	368675	1/4:39,35	1/7:38,38	1/3:24,21	1/2:31,23	3/9:3,2	6/3:13,9	4/2:31,28	1/1:50	2/4:348,213	9/9:22	4/1:44,42	7/2:17,10	7/2:79,33	1/3:23,14	2/5:29,29		4/3:94,83	1/17:6,1
Tamiami × Solbrio	18MM_532_185	368675	1/4:47,44	1/7:61,44	3/1:30,28	1/2:35,33	9/3:12,7	3/6:19,10	4/2:34,25	1/1:64	2/4:392,274	9/9:22	1/4:58,48	2/7:14,9	7/2:76,42	1/3:21,17	5/2:35,33		4/3:93,92	1/3:4,3
Tamiami × Solbrio	18MM_532_186	368675	1/4:42,41	7/1:42,28	3/1:22,21	1/2:28,24	3/9:9,9	6/3:10,10	4/2:31,20	1/1:50	2/4:292,195	9/9:11	1/4:47,38	2/7:12,8	7/2:65,41	1/3:23,12	5/2:29,26		3/4:75,74	3/1:4,4
Tamiami × Solbrio	18MM_532_188	368675	4/1:38,31	1/7:45,45	3/1:28,18	2/4:25,20	9/3:7,5	3/6:11,9	4/2:20,16	1/1:46	2/4:363,241	9/9:20	4/1:47,40	2/7:9,6	7/2:77,35	1/3:22,19	5/2:44,33		3/4:76,76	1/3:8,4
Tamiami × Solbrio	18MM_532_191	368675	1/4:31,27	1/7:45,26	1/3:22,15	2/1:40,26	3/9:10,6	3/6:16,14	4/2:18,17	1/1:73	2/4:328,225	9/9:17	1/4:43,40	2/7:9,9	7/2:64,33	1/3:27,7	2/5:42,25		3/4:71,58	3/78:6,1
Tamiami × Solbrio	18MM_532_62	368675	1/4:16,16	7/1:15,12	1/3:11,9	1/2:15,10	9/3:3,2	3/6:7,4	4/2:19,8	3/1:14,6	2/4:124,86	9/9:12	1/4:25,18	2/7:5,3	7/2:31,16	1/3:9,2	1/2:19,8		4/3:30,28	3/2:1,1
Tamiami × Solbrio	18MM_532_84	368675	4/23:20,11	7/1:18,11	3/1:12,11	1/2:7,6	3/9:4,2	6/3:6,2	4/2:16,8	1/1:28	2/4:127,91	9/9:5	1/4:25,23	2/7:4,4	7/2:32,17	1/3:7,3	5/2:11,8		3/4:25,16	218/3:1,1
Tamiami × Solbrio	18MM_532_86	368675	4/1:23,13	7/1:26,19	1/3:14,8	1/2:12,10	9/631:3,1	6/3:3,3	4/2:11,9	1/1:31	2/4:131,71	9/9:15	1/4:17,12	2/7:5,3	7/2:36,21	1/3:15,2	2/5:10,8		4/3:33,25	1/777:3,1
Tamiami × Solbrio	18MM_532_88	368675	1/23:14,14	1/7:24,10	3/1:11,10	2/1:14,9	9/9:4	3/6:4,1	4/2:14,9	1/1:24	2/4:124,72	9/9:2	4/1:16,16	7/2:5,4	7/2:37,13	1/3:5,1	5/2:14,11		4/3:32,26	279/3:1,1
Tamiami × Solbrio	18MM942	368675	23/4:28,27	3/7:35,34	3/2:17,17	4/2:23,14	1/9:9,7	1/3:15,13	2/4:19,17	3/1:32,28	2/1:319,213	3/9:14,13	1/4:33,28	4/7:4,3	7/1:71,63	3/1:10,8	1/2:35,18		4/1:65,57	1/2:6,3
Tamiami × Solbrio	18MM_531_02	124073	1/4:19,16	1/7:28,18	3/1:13,12	2/4:14,11	9/1:4,4	3/626:4,2	2/4:12,10	1/3:19,13	2/4:183,105	9/9:15	4/1:28,24	2/7:4,4	7/2:39,15	1/3:11,5	5/2:14,12		4/3:31,22	1/3:4,2
Tamiami × Solbrio	18MM_531_05	124073	1/4:21,16	7/1:21,14	3/1:18,8	2/4:19,8	9/1:5,1	3/1:5,2	4/2:15,8	3/1:16,11	2/4:176,82	9/9:10	1/4:27,11	7/2:4,3	7/2:35,2	1/3:9,3	5/2:23,19		4/3:44,41	498/1:1,1
Tamiami × Solbrio	18MM_531_105	124073	1/4:16,10	7/1:14,10	1/3:7,6	1/2:17,15	9/3:3,2	6/3:3,2	4/2:8,4	1/746:19,1	2/4:159,76	9/9:2	1/4:19,14	2/7:3,2	7/2:25,11	1/3:12,2	2/5:8,8		4/3:22,19	1/3:2,1
Tamiami × Solbrio	18MM_531_108	124073	1/23:11,10	7/1:5,4	3/1:12,5	2/1:12,10	3/9:4,2	3/6:3,2	4/2:10,5	1/1:21	2/4:100,53	9/9:6	1/4:15,13	2/7:2,1	2/7:10,10	1/3:8,4	5/2:11,5		4/3:21,20	48/309:1,1
Tamiami × Solbrio	18MM_531_113	124073	4/23:13,8	7/1:16,10	1/3:10,10	1/2:7,4	9/3:2,1	3/6:2,1	4/2:7,3	1/625:15,1	2/4:125,60	9/9:3	1/4:10,8	2/7:3,2	7/2:27,8	1/3:6,4	5/2:14,11		3/4:21,20	1/1:1
Tamiami × Solbrio	18MM_531_119	124073	1/4:19,13	1/7:13,13	1/3:10,10	4/2:10,9	375/9:1,1	3/165:2,1	4/2:12,5	1/3:9,3	2/4:137,75	9/9:7	4/1:21,11	2/7:3,3	7/2:27,12	3/1:7,7	2/5:12,10		4/3:27,22	3/1:3,1
Tamiami × Solbrio	18MM_531_12	124073	4/1:22,19	7/1:20,18	3/1:22,12	4/2:12,11	1/9:6,4	3/1:6,3	4/2:14,2	1/3:10,7	2/4:181,115	9/9:8	4/1:15,12	7/2:3,2	7/2:37,8	1/3:16,8	2/5:17,12		3/4:31,25	22/3:1,1
Tamiami × Solbrio	18MM_531_120	124073	4/1:14,9	7/1:11,10	1/3:11,6	4/2:11,10	9/1:3,3	3/717:2,1	4/2:9,4	3/1:13,6	2/4:94,65	9/9:1	1/4:13,12	7/2:4,2	7/2:31,9	1/3:17,1	2/5:12,3		4/3:19,13	1/367:3,1
Tamiami × Solbrio	18MM_531_124	124073	1/4:16,13	7/1:18,7	1/3:8,4	1/2:13,7	3/9:3,3	6/3:3,3	4/2:12,7	1/19:17,1	2/4:151,80	9/9:11	1/4:14,12	7/2:6,3	7/2:20,9	1/3:5,3	5/2:14,7		4/3:45,26	3/567:1,1
Tamiami × Solbrio	18MM_531_130	124073	1/4:14,10	7/1:12,7	3/1:12,4	2/4:13,5	1/9:3,1	3/1:3,1	2/4:11,8	1/3:11,8	2/4:102,64	9/9:4	4/1:15,15	7/2:5,2	7/2:25,12	3/29:3,2	2/5:11,4		3/4:27,21	272/272:1
Tamiami × Solbrio	18MM_531_139	124073	4/23:14,10	1/7:12,12	1/3:9,7	2/1:5,4	9/3:2,1	1/3:1,1	4/2:12,5	1/3:11,4	2/4:108,58	9/9:7	1/4:13,11	2/7:5,2	7/2:21,17	1/3:8,6	2/5:14,10		4/3:40,25	272/3:1,1
Tamiami × Solbrio	18MM_531_14	124073	1/4:18,17	1/7:18,17	3/1:13,8	2/4:14,12	9/1:5,2	3/62:5,1	4/2:12,7	1/3:14,10	2/4:163,94	9/9:10	1/4:19,11	2/7:7,2	7/2:32,14	1/3:12,7	2/5:13,8		3/4:44,25	3/1:5,3
Tamiami × Solbrio	18MM_531_142	124073	1/4:16,13	1/7:15,10	1/3:17,6	2/4:15,4	1/9:5,1	3/1:2,1	4/2:9,7	3/1:11,9	2/4:110,79	9/9:6	4/1:18,15	2/7:3,3	7/2:23,10	3/1:4,4	2/5:13,11		3/4:34,30	1/414:2,1
Tamiami × Solbrio	18MM_531_150	124073	1/4:13,12	1/7:16,12	1/3:5,5	2/1:14,10	3/3:4	3/6:3,1	4/2:13,5	1/1:24	2/4:133,91	9/9:3	4/1:20,18	7/2:6,3	7/2:23,15	1/3:9,5	5/2:15,5		3/4:22,20	133/3:1,1
Tamiami × Solbrio	18MM_531_173	124073	23/4:14,11	7/1:19,10	1/3:8,7	1/2:14,5	3/9:1,1	3/6:2,1	4/2:14,5	1/106:25,2	2/4:141,63	9/9:4	1/4:24,15	2/7:3,2	7/2:18,13	1/3:12,2	2/5:7,6		3/4:35,26	3/1:3,2
Tamiami × Solbrio	18MM_531_23	124073	1/4:17,15	1/7:26,20	3/1:14,13	4/2:12,4	9/1:3,3	3/1:2,1	4/2:25,11	1/3:12,7	2/4:226,110	9/9:9	1/4:21,18	2/7:7,3	7/2:25,12	1/3:21,5	2/5:12,11		4/3:43,34	1/3:3,1
Tamiami × Solbrio	18MM_531_27	124073	1/4:28,23	1/7:18,17	3/1:22,16	2/4:16,11	1/9:7,2	3/356:4,1	4/2:16,7	3/1:14,12	2/4:182,114	9/9:9	1/4:27,20	2/7:10,3	7/2:36,25	1/3:18,5	5/2:12,11		3/4:31,30	1/3:5,2
Tamiami × Solbrio	18MM_531_34	124073	1/4:17,15	7/1:18,17	1/3:10,10	1/2:18,13	3/9:3,1	6/735:4,1	4/2:21,8	1/1:26	2/4:178,97	9/9:11	1/4:22,13	2/7:4,3	7/2:24,17	1/3:11,6	2/5:20,12		3/4:35,35	1/3:3,2
Tamiami × Solbrio	18MM_531_35	124073	1/4:15,12	7/1:24,17	3/1:16,8	2/4:15,14	9/1:4,2	93/3:1,1	4/2:20,10	3/1:20,13	2/4:168,103	9/9:9	4/1:20,18	7/2:5,4	7/2:42,19	1/3:17,5	2/5:14,10		3/4:39,28	3/1:4,3
Tamiami × Solbrio	18MM_531_36	124073	4/23:16,13	1/7:28,24	1/3:12,11	2/4:15,11	9/1:3,3	3/1:5,2	2/4:12,9	1/3:16,13	2/4:170,113	9/9:5	1/4:23,20	2/7:5,3	7/2:31,23	1/3:13,6	5/2:16,14		3/4:42,35	3/1:4,3
Tamiami × Solbrio	18MM_531_59	124073	4/1:23,18	7/1:16,14	1/3:16,9	4/2:16,15	9/326:3,1	3/1:3,1	2/4:13,6	1/3:14,13	2/4:175,98	9/9:3	1/4:14,9	2/7:6,3	7/2:34,18	1/3:18,6	2/5:12,6		4/3:37,34	3/1:9,3
Tamiami × Solbrio	18MM_531_97	124073	1/23:19,11	1/7:18,16	1/3:11,7	1/2:11,8	3/9:3,2	6/3:4,2	4/2:12,10	1/1:31	2/4:195,95	9/9:6	1/4:25,23	7/2:6,4	7/2:43,23	3/1:7,7	2/5:17,14		4/3:41,33	434/57:1,1
Tamiami × Solbrio	18MM_532_01	124073	4/1:12,7	7/1:16,8	3/1:11,6	1/2:7,7	3/326:3,1	3/6:9,6	2/4:9,6	1/1:20	2/4:113,66	9/9:6	1/4:15,13	7/2:8,4	7/2:23,15	1/3:12,1	5/2:13,10		3/4:27,26	344/43:1,1
Tamiami × Solbrio	18MM_532_106	124073	23/1:16,15	7/1:12,6	1/3:7,6	1/2:10,8	3/9:3,2	3/6:4,3	2/4:11,5	1/1:20	2/4:122,71	9/9:5	1/4:14,12	7/2:7,4	7/2:36,6	1/3:5,2	2/5:13,13		3/4:21,15	1/15:4,1
Tamiami × Solbrio	18MM_532_116	124073	4/23:16,15	7/1:24,18	3/1:19,10	2/4:16,13	9/1:7,4	3/23:4,1	4/2:20,4	1/3:13,7	2/4:134,105	9/9:12	1/4:23,22	2/7:3,2	7/2:28,18	1/3:7,4	2/5:10,7		3/4:26,21	3/346:4,1
Tamiami × Solbrio	18MM_532_118	124073	4/1:16,11	1/7:13,13	1/3:12,6	4/2:16,6	1/9:4,2	1/3:2,2	4/2:19,8	3/1:11,6	2/4:131,79	9/9:7	1/4:21,19	2/7:6,2	7/2:34,16	1/3:13,3	2/5:12,11		3/4:23,23	3/1:2,2
Tamiami × Solbrio	18MM_532_12	124073	4/1:14,10	7/1:19,14	1/3:8,8	2/1:9,8	3/9:3,1	3/6:6,2	4/2:9,5	1/650:18,1	2/4:124,56	9/9:2	4/1:16,16	2/7:6,3	7/2:24,10	1/3:5,1	5/2:14,10		3/4:22,21	1/402:2,1
Tamiami × Solbrio	18MM_532_120	124073	4/1:19,17	1/7:17,14	3/1:20,7	4/2:12,10	9/1:4,3	3/1:9,2	4/2:12,10	1/3:14,12	2/4:132,89	9/9:9	1/4:13,10	2/7:3,2	7/2:28,10	3/1:8,8	5/2:12,10		3/4:33,33	3/60:4,1
Tamiami × Solbrio	18MM_532_13	124073	1/4:17,11	7/1:23,13	3/1:7,6	2/4:12,9	9/69:2,1	3/1:3,1	4/2:11,9	1/3:9,8	2/4:99,68	9/9:9	1/4:15,8	7/2:3,2	7/2:24,11	1/3:13,5	2/5:8,8		4/3:29,23	1/3:2,1
Tamiami × Solbrio	18MM_532_143	124073	4/1:44,43	1/7:44,37	3/1:30,24	4/2:31,23	9/1:8,8	3/1:7,3	4/2:25,23	3/1:30,30	2/4:368,202	9/9:17	1/4:54,42	2/7:10,9	7/2:71,40	1/3:25,7	5/2:38,32		4/3:82,67	3/1:4,4
Tamiami × Solbrio	18MM_532_146	124073	1/4:48,30	1/7:52,38	3/1:29,21	4/2:33,32	9/1:10,8	3/1:5,4	4/2:26,17	3/1:37,32	2/4:373,239	9/9:24	4/1:49,37	7/2:8,7	7/2:86,31	1/3:24,12	5/2:29,26		3/4:83,69	3/1:7,3
Tamiami × Solbrio	18MM_532_152	124073	4/1:44,40	7/3:37,35	1/3:32,27	2/1:30,25	9/1:11,8	3/2:18,16	4/4:32	1/3:35,30	1/2:342,331	9/1:27,17	1/4:55,49	7/1:10,9	1/7:78,73	1/3:33,14	1/5:36,27		1/3:91,88	1/257:10,1
Tamiami × Solbrio	18MM_532_156	124073	4/1:54,37	1/7:53,48	3/1:41,25	2/4:38,28	9/1:8,4	3/1:15,13	4/2:39,32	1/3:38,28	2/4:423,291	9/9:22	1/4:63,60	2/7:15,7	7/2:78,56	1/3:33,9	2/5:41,35		3/4:87,77	1/3:7,4
Tamiami × Solbrio	18MM_532_17	124073	23/4:22,21	7/7:39	3/11:24,2	2/2:22	9/653:11,2	3/837:7,1	4/453:11,1	1/1:24	2/14:292,15	9/9:20	4/4:27	7/7:5	7/7:92	3/3:6	5/5:31		3/3:79	1/7:4,1
Tamiami × Solbrio	18MM_532_172	124073	1/4:34,32	7/1:43,42	3/1:20,16	1/2:32,32	9/3:12,8	3/6:20,16	4/2:28,17	1/1:56	2/4:322,210	9/530:23,2	4/1:64,40	7/2:14,6	7/2:77,37	1/3:23,15	5/2:33,30		3/4:90,72	1/3:11,3
Tamiami × Solbrio	18MM_532_176	124073	4/1:45,42	1/7:47,40	1/3:23,22	2/4:38,32	1/9:13,9	3/1:13,8	2/4:17,17	1/3:31,28	2/4:324,199	9/9:20	4/1:36,35	2/7:7,4	7/2:65,48	1/3:26,8	5/2:31,22		3/4:66,42	3/1:5,2
Tamiami × Solbrio	18MM_532_179	124073	4/1:32,25	1/7:45,34	1/3:28,24	4/2:37,25	1/9:9,4	3/1:13,1	4/2:36,21	3/1:26,24	2/4:361,211	9/9:19	1/4:41,35	2/7:7,7	7/2:65,45	1/3:35,16	5/2:32,30		4/3:65,64	3/1:7,6
Tamiami × Solbrio	18MM_532_180	124073	4/1:54,39	1/7:61,45	1/3:34,31	2/4:39,38	9/1:12,10	3/1:16,4	4/2:31,20	1/3:31,22	2/4:405,258	9/9:21	4/1:54,42	2/7:11,7	7/2:76,48	1/3:20,15	5/2:32,27		3/4:74,70	3/1:2,2
Tamiami × Solbrio	18MM_532_20	124073	4/1:10,8	1/7:23,17	1/3:14,7	2/4:14,10	9/1:4,2	3/1:3,1	4/2:12,5	3/1:8,5	2/4:126,84	9/9:3	1/4:25,15	2/7:3,2	7/2:34,13	3/1:7,6	5/2:13,12		4/3:40,28	1/1:2
Tamiami × Solbrio	18MM_532_23	124073	1/4:24,13	1/7:15,12	3/1:9,7	2/4:11,9	42/9:2,2	1/3:3,2	4/2:17,5	3/1:18,10	2/4:139,106	9/9:12	4/1:22,20	2/7:6,2	7/2:27,9	1/3:7,4	2/5:13,12		4/3:34,23	1/3:3,2
Tamiami × Solbrio	18MM_532_33	124073	4/1:26,15	1/7:13,13	1/3:9,6	2/4:15,5	3/9:2,2	6/3:7,6	2/4:7,4	1/1:23	2/4:127,83	9/9:6	4/1:13,9	2/32:6,1	7/2:29,11	1/3:6,5	2/5:9,9		4/3:35,33	3/47:4,1
Tamiami × Solbrio	18MM_532_39	124073	1/4:14,14	1/7:20,10	1/3:14,7	1/2:15,6	3/9:2,2	3/6:3,2	4/2:8,4	1/1:22	2/4:125,84	9/9:11	4/1:17,15	2/44:5,1	7/2:21,15	1/3:11,3	2/5:15,10		4/3:32,27	1/417:2,1
Tamiami × Solbrio	18MM_532_40	124073	4/1:23,13	1/7:19,15	3/1:12,11	1/2:18,13	3/9:5,3	3/6:4,3	4/2:14,8	1/561:17,2	2/4:142,83	9/9:10	1/4:24,18	2/7:2,2	7/2:31,19	1/3:10,3	5/2:13,8		3/4:41,41	1/1:1
Tamiami × Solbrio	18MM_532_51	124073	4/1:12,10	1/7:15,14	1/3:7,4	4/2:11,8	1/9:6,3	3/1:2,1	2/4:16,7	3/1:17,13	2/4:128,82	9/9:1	4/1:26,14	7/2:8,5	7/2:22,19	1/3:9,6	2/5:10,10		3/4:36,21	279/170:1,1
Tamiami × Solbrio	18MM_532_66	124073	1/2:34,3	7/1:24,13	1/3:12,6	2/1:19,7	9/155:2,1	3/6:3,1	4/2:12,7	1/1:24	2/4:142,74	9/9:11	4/1:18,16	7/2:3,2	7/2:33,21	1/3:11,3	2/5:14,8		4/3:39,38	1/193:5,1
Tamiami × Solbrio	18MM_532_74	124073	4/1:14,12	1/7:20,11	3/1:7,6	2/4:13,11	9/1:3,3	3/1:5,2	4/2:8,3	1/3:14,11	2/4:139,84	9/9:7	1/4:23,15	7/2:5,3	7/2:39,13	3/1:10,8	2/5:10,7		4/3:40,29	72/3:1,1
Tamiami × Solbrio	18MM_532_87	124073	1/4:18,12	7/3:20,18	3/1:9,7	1/2:14,13	9/1:5,3	3/2:4,3	4/532:14,1	3/1:16,13	2/1:136,129	1/9:15,13	1/4:23,17	1/7:3,3	1/7:29,23	1/3:9,2	1/5:12,9		1/3:33,22	2/178:3,1
Tamiami × Solbrio	18MM_532_93	124073	4/1:18,13	7/1:15,12	3/1:14,9	2/1:13,11	9/3:3,1	3/6:6,2	4/2:11,8	1/1:29	2/4:126,76	9/672:6,1	4/1:23,23	2/7:2,2	7/2:39,14	1/3:12,5	5/2:12,9		3/4:35,23	3/702:4,1
Tamiami × Solbrio	18MM_532_97	124073	4/1:14,10	1/7:12,11	1/3:12,12	1/2:13,9	9/3:5,3	6/3:5,2	4/2:12,5	1/1:29	2/4:131,62	9/734:6,1	4/1:23,16	7/2:4,2	7/2:27,10	1/3:10,2	2/5:12,11		4/3:33,23	3/469:5,1
Tamiami × Solbrio	18MM_538_134	124073	1/23:30,16	7/1:33,24	7/3:21,13	2/1:24,2	1/9:7,4	2/3:3,2	4/4:30	1/3:20,16	2/1:289,220	9/1:16,16	1/4:38,31	4/7:10,5	7/3:33,29	1/3:18,4	1/6:18,15		6/1:65,65	2/13:5,1
Tamiami × Solbrio	18MM881	124073	1/2:52,4	7/1:25,24	1/3:15,11	2/1:22,18	9/3:10,7	3/6:13,11	4/2:20,15	1/1:32	2/4:270,203	9/9:15	4/1:28,26	7/2:7,2	7/2:49,29	1/3:18,5	5/2:19,10		3/4:54,54	1/3:4,3
Tamiami × Solbrio	18MM910	124073	4/1:30,27	1/7:27,22	1/3:21,11	1/2:20,14	1/9:8,5	2/3:11,6	4/496:16,1	4/1:22,17	2/4:334,182	9/9:11	4/1:43,42	2/7:16,8	7/2:74,17	1/3:19,10	2/5:27,26		3/4:54,53	3/1:5,4
Tamiami × Solbrio	18MM_531_179	53955.5	1/4:12,9	7/1:15,6	3/1:10,7	2/1:12,2	3/3:2	6/3:3,1	2/4:8,4	1/749:18,1	2/4:95,64	9/9:9	1/4:11,6	7/2:5,2	7/2:20,7	1/3:8,1	2/5:7,6		3/4:22,13	./.:0
Tamiami × Solbrio	18MM_532_48	53955.5	3/4:19,12	7/3:14,13	3/2:14,10	1/2:16,6	9/9:3	283/3:5,1	5/4:9,6	1/108:27,2	2/31:126,85	9/9:7	1/4:24,15	./.:0	7/133:33,30	3/72:4,1	5/5:22		3/3:52	1/374:1,1
Tamiami × Solbrio	18MM_531_102	40861.2	4/1:23,20	7/1:23,16	3/1:12,4	2/4:21,16	1/9:3,2	1/3:5,3	4/2:17,10	1/3:14,10	2/4:195,90	9/11:8,1	4/1:32,20	2/7:5,4	7/2:49,20	1/3:8,6	2/5:23,21		4/3:38,35	3/1:4,3
Tamiami × Solbrio	18MM_531_128	40861.2	23/4:10,10	7/1:18,13	1/3:9,7	2/4:8,8	9/1:3,3	1/3:2,1	4/2:11,6	3/1:8,8	2/4:126,66	9/9:8	1/4:20,17	2/32:2,1	7/2:23,16	1/3:4,2	2/5:8,6		3/4:25,18	7/7:1
Tamiami × Solbrio	18MM_531_132	40861.2	4/23:10,9	7/1:11,9	1/3:10,10	4/2:7,4	1/9:3,2	1/3:2,2	4/2:10,5	3/1:16,11	2/4:124,55	9/9:10	4/1:14,14	2/7:6,2	7/2:22,12	1/236:11,1	2/5:12,10		3/4:30,27	1/434:2,1
Tamiami × Solbrio	18MM_531_138	40861.2	4/1:14,8	1/7:10,10	1/3:10,10	4/2:16,6	9/1:4,3	3/1:2,1	4/2:8,6	1/3:10,7	2/4:109,67	9/9:7	1/4:15,12	2/143:3,1	7/2:26,10	3/1:4,3	5/2:13,11		4/3:31,30	3/599:3,1
Tamiami × Solbrio	18MM_531_143	40861.2	1/23:19,11	1/7:10,8	3/1:9,7	1/2:8,8	9/3:2,1	6/3:2,1	4/2:11,8	1/169:18,1	2/4:127,76	9/9:1	4/1:16,8	7/2:7,2	7/2:27,6	3/245:4,2	5/2:14,11		4/3:30,20	1/3:4,2
Tamiami × Solbrio	18MM_531_145	40861.2	1/4:13,13	1/7:12,12	1/3:13,6	2/4:10,5	9/1:5,3	1/208:2,1	4/2:6,5	3/1:13,8	2/4:117,84	9/9:6	4/1:17,15	7/88:6,2	7/2:22,13	1/3:6,1	5/2:11,10		4/3:33,27	1/109:1,1
Tamiami × Solbrio	18MM_531_146	40861.2	23/4:17,10	1/7:16,7	3/1:9,6	2/4:11,9	9/103:3,1	40/625:1,1	2/4:2,2	1/3:11,7	2/4:123,58	9/9:7	4/1:16,15	2/7:4,2	7/2:24,12	1/3:9,2	2/5:9,4		4/3:26,13	3/1:1,1
Tamiami × Solbrio	18MM_531_147	40861.2	1/4:19,11	7/1:15,11	3/1:10,8	2/1:9,6	9/653:4,1	6/3:4,3	2/4:9,7	1/30:17,1	2/4:126,54	9/673:5,1	4/1:14,9	2/7:4,2	7/2:25,10	1/3:13,1	5/2:5,4		4/3:21,20	101/3:1,1
Tamiami × Solbrio	18MM_531_153	40861.2	1/23:12,8	1/7:16,15	3/1:9,6	2/4:9,7	326/1:2,2	3/3:3	2/4:7,4	3/1:12,7	2/4:126,61	9/9:7	4/1:13,11	7/2:6,4	7/2:24,13	1/3:8,2	2/5:10,6		4/3:26,25	3/799:2,1
Tamiami × Solbrio	18MM_531_155	40861.2	4/1:14,12	1/7:8,8	1/3:6,6	1/2:6,6	9/3:3,1	3/6:5,1	4/2:11,7	1/953:16,1	2/4:116,68	9/734:8,1	1/4:19,10	2/7:4,4	7/2:29,6	1/3:13,4	5/2:9,7		4/3:28,26	3/1:2,1
Tamiami × Solbrio	18MM_531_157	40861.2	1/4:11,10	7/1:14,13	3/1:13,10	2/1:11,10	3/9:3,3	6/3:3,2	4/2:10,4	1/87:18,1	2/4:161,67	9/9:3	4/1:12,12	857/95:1,1	7/2:24,11	1/3:8,7	2/5:8,8		3/4:27,23	3/1:2,2
Tamiami × Solbrio	18MM_531_160	40861.2	1/4:13,8	1/7:17,10	3/1:10,9	1/2:11,4	3/9:2,1	1/297:1,1	4/2:10,6	3/1:8,7	2/4:124,62	9/9:5	1/4:15,3	2/7:5,3	7/2:21,12	1/3:4,3	2/5:13,4		4/3:23,19	199/3:1,1
Tamiami × Solbrio	18MM_531_161	40861.2	4/1:12,11	1/7:13,8	1/3:9,8	2/4:8,8	9/1:2,1	1/415:2,1	4/2:16,9	1/3:13,5	2/4:110,68	9/9:6	4/1:16,14	2/7:8,4	7/2:22,13	1/3:8,4	5/2:12,8		3/4:20,15	1/3:3,1
Tamiami × Solbrio	18MM_531_17	40861.2	1/23:17,13	1/7:22,13	3/1:10,9	2/4:13,10	1/9:5,1	3/1:6,4	4/2:13,5	3/1:10,9	2/4:161,86	9/9:9	1/4:21,20	7/2:3,2	7/2:31,11	1/3:9,5	2/5:15,7		3/4:27,20	1/3:4,2
Tamiami × Solbrio	18MM_531_177	40861.2	1/4:10,10	1/7:13,10	1/3:14,6	2/1:14,10	3/9:3,1	3/473:6,1	4/2:16,10	1/151:16,1	2/4:120,69	9/530:7,1	4/1:14,9	2/7:4,2	7/2:15,10	1/3:13,3	1/2:11,7		4/3:32,24	3/248:2,1
Tamiami × Solbrio	18MM_531_181	40861.2	23/4:8,6	1/7:14,10	1/3:7,4	4/2:8,7	9/3:5,2	6/3:3,2	4/2:9,7	1/95:14,1	2/4:111,56	9/530:7,1	4/1:20,12	2/7:5,1	2/7:15,15	3/1:2,2	2/5:12,9		3/4:24,19	3/279:2,1
Tamiami × Solbrio	18MM_531_21	40861.2	1/2:39,5	7/1:17,14	1/3:12,12	4/2:11,8	1/9:3,1	1/3:3,3	2/4:14,14	1/3:14,10	2/4:184,112	9/9:7	4/1:18,14	2/7:6,6	7/2:25,17	1/3:13,8	5/2:11,6		4/3:34,29	1/1:3
Tamiami × Solbrio	18MM_531_22	40861.2	1/2:32,3	7/1:23,22	3/1:10,9	4/2:14,7	1/9:5,2	3/351:7,1	4/2:23,15	3/1:15,11	2/4:223,91	9/9:7	4/1:31,19	7/2:8,6	7/2:32,11	1/3:14,4	2/5:20,12		3/4:48,42	3/1:4,4
Tamiami × Solbrio	18MM_531_24	40861.2	1/4:24,18	7/1:18,17	1/3:16,10	2/4:12,9	1/9:7,6	1/3:5,2	4/2:16,8	3/1:19,14	2/4:170,96	9/530:5,1	4/1:18,8	7/2:6,3	7/2:33,16	1/3:19,7	2/5:13,8		4/3:42,34	1/3:4,1
Tamiami × Solbrio	18MM_531_39	40861.2	1/23:20,11	7/1:20,15	1/3:13,13	1/2:17,15	9/3:6,4	6/3:5,3	4/2:24,13	1/152:31,2	2/4:174,94	9/9:10	1/4:25,23	7/2:7,5	7/2:33,17	1/3:6,2	2/5:19,18		4/3:40,29	3/31:3,1
Tamiami × Solbrio	18MM_531_47	40861.2	1/23:19,16	1/7:15,15	1/3:15,12	2/4:13,12	9/1:2,1	3/40:5,1	4/2:14,7	1/3:17,13	2/4:194,100	9/9:11	4/1:25,18	2/7:6,6	7/2:31,13	1/3:8,2	5/2:16,9		3/4:47,31	3/1:3,3
Tamiami × Solbrio	18MM_531_49	40861.2	1/4:21,20	7/1:19,14	3/1:15,10	4/2:16,13	9/1:6,3	1/291:2,1	4/2:24,13	3/1:15,15	2/4:162,99	9/9:6	4/1:23,23	2/7:6,1	7/2:31,13	1/3:13,7	5/2:12,10		3/4:38,36	1/352:2,1
Tamiami × Solbrio	18MM_531_56	40861.2	23/1:17,13	1/7:24,14	3/1:14,13	4/2:13,8	9/1:5,4	3/746:4,1	4/2:12,9	1/3:19,17	2/4:148,114	9/9:6	4/1:24,13	2/7:2,2	7/2:40,18	1/3:12,5	5/2:15,10		4/3:36,26	3/1:3,3
Tamiami × Solbrio	18MM_531_61	40861.2	1/4:21,21	7/1:21,18	1/3:15,12	4/2:17,9	9/1:1,1	3/1:4,1	4/2:19,7	3/1:22,17	2/4:208,105	9/673:8,1	1/4:31,17	2/7:4,2	7/2:35,15	1/3:10,6	5/2:17,11		3/4:42,37	3/3:6
Tamiami × Solbrio	18MM_531_68	40861.2	1/4:19,12	7/1:14,10	3/1:9,8	2/1:16,9	1/47:2,1	1/3:1,1	2/4:10,9	1/3:13,10	2/4:134,66	9/9:12	4/1:14,12	7/2:5,4	7/2:42,14	1/3:16,10	2/5:21,9		3/4:26,25	1/310:4,1
Tamiami × Solbrio	18MM_531_78	40861.2	1/4:18,18	1/7:18,16	1/3:18,9	2/4:11,10	9/1:2,1	3/1:5,2	4/2:16,11	1/3:17,12	2/4:194,86	9/734:8,1	1/4:23,21	2/7:4,3	7/2:37,12	1/3:11,6	5/2:16,14		3/4:51,43	3/1:3,2
Tamiami × Solbrio	18MM_531_79	40861.2	4/1:19,10	7/1:13,12	3/1:12,9	2/1:15,14	3/9:4,2	6/178:2,1	4/2:10,7	1/346:18,1	2/4:143,82	9/9:5	1/4:14,12	7/2:4,2	7/2:18,7	1/3:16,4	2/5:12,11		4/3:23,17	3/309:2,1
Tamiami × Solbrio	18MM_531_86	40861.2	1/4:24,17	1/7:19,14	3/1:23,15	4/2:15,10	9/165:2,1	3/1:7,3	4/2:10,5	3/1:17,9	2/4:177,110	9/734:13,1	1/4:27,25	2/7:8,3	7/2:24,9	1/3:12,7	2/5:15,9		4/3:46,33	3/665:4,1
Tamiami × Solbrio	18MM_531_90	40861.2	1/4:24,19	7/1:26,19	3/1:11,8	4/2:14,11	9/1:6,6	3/19:4,1	4/2:17,11	3/1:13,10	2/4:169,104	9/9:13	4/1:26,10	1/2:8,4	1/2:27,22	1/1:24	1/2:21,14		1/4:45,39	3/2:5,3
Tamiami × Solbrio	18MM_532_155	40861.2	23/1:39,38	1/7:45,40	3/1:27,25	2/4:27,27	1/9:8,5	3/1:8,4	4/2:32,21	3/1:23,22	2/4:374,221	9/9:29	1/4:51,49	7/2:10,7	7/2:90,47	1/3:26,12	5/2:29,28		3/4:85,70	3/1:6,3
Tamiami × Solbrio	18MM_532_168	40861.2	1/23:41,34	1/7:59,58	3/1:26,25	2/1:33,29	9/3:14,10	3/6:12,8	4/2:31,29	1/1:67	2/4:396,271	9/673:16,1	1/4:52,47	2/7:10,10	7/2:87,36	1/3:34,10	2/5:50,40		3/4:100,91	1/3:7,3
Tamiami × Solbrio	18MM_532_21	40861.2	1/4:11,11	7/1:14,12	3/1:8,7	4/2:11,8	1/9:4,3	3/1:5,1	4/2:13,9	3/1:10,10	2/4:137,73	9/9:9	4/1:26,23	2/2:3	7/2:21,17	1/3:11,2	2/5:11,11		3/4:32,27	1/11:1,1
Tamiami × Solbrio	18MM_532_24	40861.2	4/1:20,18	7/1:23,19	1/3:10,7	2/1:12,11	9/3:5,3	6/3:3,3	4/2:7,5	1/241:16,1	2/4:148,105	9/672:16,1	1/4:13,12	2/7:6,2	7/2:31,15	1/3:11,5	2/5:17,13		3/4:32,25	1/3:2,1
Tamiami × Solbrio	18MM_532_29	40861.2	1/4:23,17	1/7:15,9	1/3:13,9	1/2:16,12	9/3:4,2	6/6:1	4/2:11,10	1/1:25	2/4:137,100	9/11:13,1	4/1:16,11	2/7:5,2	7/2:39,14	1/3:11,7	2/5:12,10		3/4:36,29	3/283:3,1
Tamiami × Solbrio	18MM_532_30	40861.2	1/23:11,9	7/1:10,9	3/1:9,7	2/1:12,8	3/9:2,2	6/3:2,1	4/2:8,7	1/41:13,1	2/4:127,75	9/9:11	1/4:21,20	2/7:5,3	7/2:23,6	1/3:12,4	5/2:12,11		3/4:29,26	3/1:3,2
Tamiami × Solbrio	18MM_532_31	40861.2	1/23:11,10	7/1:11,9	1/3:10,5	4/2:12,10	1/9:5,4	1/3:4,3	4/2:12,9	3/1:6,4	2/4:123,88	9/9:9	4/1:16,11	7/2:4,3	7/2:30,11	1/3:7,1	2/5:16,8		4/3:26,25	3/1:3,1
Tamiami × Solbrio	18MM_532_37	40861.2	4/1:22,14	7/1:21,16	1/3:11,10	4/2:8,5	9/49:3,1	3/207:3,1	4/2:10,7	3/1:12,11	2/4:132,68	9/9:9	4/1:15,9	2/478:1,1	7/2:39,14	1/3:17,6	5/2:13,12		3/4:25,20	3/13:2,1
Tamiami × Solbrio	18MM_532_47	40861.2	1/23:15,10	7/3:20,16	1/3:9,9	1/2:15,12	1/9:5,2	3/2:8,3	4/306:12,1	1/3:14,10	2/1:163,123	9/1:8,5	4/1:26,13	7/1:5,4	7/1:33,31	1/3:12,4	5/1:11,4		1/3:37,33	2/151:2,1
Tamiami × Solbrio	18MM_532_49	40861.2	23/1:11,10	1/7:16,11	3/1:13,4	1/2:17,7	9/3:4,3	6/3:5,3	4/2:12,4	1/1:37	2/4:157,82	9/9:6	4/1:20,14	2/956:3,1	7/2:35,18	1/3:11,6	5/2:14,9		3/4:35,26	1/3:4,3
Tamiami × Solbrio	18MM_532_52	40861.2	23/4:13,12	1/7:15,11	1/3:7,5	4/2:11,8	9/1:6,2	3/213:6,1	4/2:13,5	3/1:9,9	2/4:91,76	9/9:2	1/4:15,13	2/2:5	7/2:23,12	1/3:9,5	5/2:7,6		4/3:24,22	3/1:2,1
Tamiami × Solbrio	18MM_532_54	40861.2	1/4:18,15	1/7:22,18	1/3:10,6	4/2:17,12	9/1:7,3	3/1:2,1	4/2:16,9	1/3:15,14	2/4:149,89	9/9:6	1/4:15,13	2/328:5,1	7/2:25,17	1/3:12,4	2/5:13,11		4/3:32,26	1/3:4,3
Tamiami × Solbrio	18MM_532_56	40861.2	23/4:11,8	7/1:18,17	1/3:10,10	2/1:14,5	9/3:5,1	3/6:10,1	2/4:15,11	1/288:18,1	2/4:158,77	9/9:5	4/1:21,21	2/32:2,1	7/2:39,16	1/3:9,4	5/2:16,10		4/3:32,31	1/704:3,1
Tamiami × Solbrio	18MM_532_57	40861.2	1/23:15,13	1/7:13,13	1/3:11,11	1/2:10,10	3/627:2,1	6/3:5,5	2/4:12,8	1/1:25	2/4:141,79	9/9:9	1/4:20,19	2/7:6,2	7/2:22,15	1/3:11,5	5/2:16,12		4/3:40,27	3/1:3,2
Tamiami × Solbrio	18MM_532_60	40861.2	4/23:18,13	7/1:20,9	1/3:8,7	2/1:14,12	3/9:1,1	6/631:5,1	4/2:8,5	1/1:20	2/4:120,80	9/9:5	4/1:11,9	7/2:6,4	7/2:33,13	1/1:11	2/5:13,9		3/4:24,18	3/1:4,3
Tamiami × Solbrio	18MM_532_75	40861.2	4/23:12,11	7/1:16,12	3/1:19,9	2/4:10,7	9/1:4,2	1/31:4,1	2/4:10,10	3/1:22,16	2/4:124,46	9/9:4	4/1:22,14	2/7:6,1	7/2:42,15	1/3:8,3	2/5:18,13		3/4:27,25	1/3:3,2
Tamiami × Solbrio	18MM_532_76	40861.2	4/1:14,12	1/7:17,14	1/3:12,10	2/4:10,10	9/1:8,3	3/1:5,4	4/2:13,8	1/3:18,16	2/4:149,98	9/9:5	1/4:21,15	7/2:2,1	7/2:37,9	1/18:10,1	2/5:22,7		3/4:28,21	3/1:4,2
Tamiami × Solbrio	18MM_532_91	40861.2	4/1:11,6	1/7:14,12	1/3:6,6	2/4:10,5	1/1:3	1/3:2,2	2/4:6,6	1/3:12,6	2/4:128,71	9/9:5	4/1:16,14	7/2:3,1	7/2:29,17	1/3:8,6	5/2:9,7		3/4:21,20	3/3:1
Tamiami × Solbrio	18MM879	40861.2	3/3:72	3/3:62	2/2:38	2/4:19,17	9/1:6,2	2/3:9,8	4/4:22	1/4:22,21	1/2:336,320	9/1:16,16	4/1:28,21	5/7:7,6	1/7:77,74	1/3:17,6	2/1:31,27		1/4:79,64	3/2:5,2
Tamiami × Solbrio	18MM890	40861.2	1/2:46,6	1/7:25,25	1/3:12,12	1/2:14,12	9/1:4,4	3/1:10,8	4/4:20	4/1:18,16	2/5:249,244	9/9:11	1/4:27,24	2/7:5,5	1/7:60,43	1/3:22,17	5/4:17,14		5/3:55,46	4/574:4,1
Tamiami × Solbrio	18MM909	40861.2	3/1:32,22	7/3:29,28	3/2:17,12	1/2:19,19	1/9:3,2	3/1:14,7	1/4:14,10	4/1:18,15	1/2:282,260	9/1:13,12	1/4:29,23	7/5:12,9	7/1:67,51	1/3:15,9	2/5:15,10		5/3:62,45	2/114:2,1
Tamiami × Solbrio	18MM_532_08	17753.1	4/1:15,12	1/7:17,13	3/1:13,6	2/1:11,8	./.:0	6/3:3,3	2/4:8,5	1/26:13,2	2/4:116,62	9/11:6,1	4/1:17,10	7/2:4,2	7/2:26,10	1/3:9,5	2/5:13,13		4/3:30,25	1/3:3,2
Tamiami × Solbrio	18MM_531_03	13123.8	1/2:30,3	1/3:17,13	1/47:29,2	1/2:20,15	9/3:5,3	6/3:6,3	4/2:19,6	1/1:24	2/4:143,89	9/9:4	4/1:21,12	2/7:8,4	7/2:29,21	1/3:10,2	5/2:13,9		3/4:30,27	44/68:1,1
Tamiami × Solbrio	18MM_531_04	13123.8	4/1:22,13	7/1:18,15	1/3:8,5	4/2:18,12	9/1:2,2	1/918:2,1	4/2:16,5	1/3:15,12	2/4:155,81	9/673:10,1	4/1:21,21	2/7:7,3	7/2:39,18	1/3:22,2	5/2:18,8		4/3:37,32	3/1:4,2
Tamiami × Solbrio	18MM_531_134	13123.8	1/23:13,11	7/1:13,10	3/1:7,6	4/2:6,4	9/539:2,1	186/186:1	4/2:18,13	1/3:9,6	2/4:188,66	9/9:18	1/4:12,9	7/2:4,3	7/2:5,4	1/3:10,3	5/2:14,11		3/4:51,43	3/1:2,1
Tamiami × Solbrio	18MM_531_162	13123.8	1/4:15,10	7/1:15,13	1/3:12,10	4/2:14,6	9/1:3,3	1/1:3	4/2:17,10	1/3:12,9	2/4:114,57	9/9:6	4/1:18,16	2/391:3,1	7/2:19,15	1/3:5,3	5/2:12,6		4/3:25,19	3/1:4,1
Tamiami × Solbrio	18MM_531_169	13123.8	4/23:14,11	7/3:12,10	1/3:7,7	1/2:17,8	1/9:2,1	3/2:5,4	4/247:7,1	1/3:14,8	1/2:174,132	1/9:8,6	1/4:15,10	2/1:1,1	7/1:30,28	1/3:3,2	5/1:11,9		3/1:24,15	1/62:2,1
Tamiami × Solbrio	18MM_531_30	13123.8	4/1:4,2	1/7:10,6	1/3:5,4	2/426:5,1	9/3:2,1	2/6:2,1	4/184:4,2	1/31:11,1	2/4:59,30	9/1:5,1	1/4:9,7	2/7:1,1	7/2:7,3	1/3:4,2	2/5:12,6		4/3:15,12	1/3:2,1
Tamiami × Solbrio	18MM_531_45	13123.8	1/4:17,17	7/1:18,15	3/1:16,7	4/2:15,6	9/1:4,2	3/1:5,3	4/2:12,6	3/1:13,7	2/4:159,82	9/9:11	1/1:40	2/1:2,2	1/2:40,12	1/1:26	2/1:12,11		4/1:36,32	2/171:2,1
Tamiami × Solbrio	18MM_531_50	13123.8	4/1:25,19	7/1:16,14	3/1:17,14	4/2:16,10	1/9:6,2	3/1:7,2	4/2:17,11	3/1:17,10	2/4:186,84	9/9:7	1/1:46	2/1:9,4	1/2:36,24	1/1:34	1/2:16,15		4/1:41,28	2/9:3,1
Tamiami × Solbrio	18MM_531_55	13123.8	1/4:27,18	1/7:30,23	3/1:11,9	2/1:18,13	3/3:6	3/6:5,3	2/4:17,12	1/61:30,2	2/4:206,106	9/1:9,1	1/4:30,26	2/7:9,7	7/2:36,21	1/3:17,4	5/2:18,11		3/4:43,31	1/3:3,1
Tamiami × Solbrio	18MM_531_99	13123.8	4/1:17,14	7/1:19,18	1/3:11,10	4/2:16,8	9/1:4,1	1/3:6,6	2/4:13,10	1/3:19,9	2/4:180,110	9/673:7,1	1/4:23,19	2/7:3,3	7/2:29,17	1/67:10,3	2/5:14,8		4/3:42,24	3/1:3,1
Tamiami × Solbrio	18MM_532_11	13123.8	23/1:14,10	1/7:14,11	1/3:12,10	1/2:12,8	3/3:4	3/6:4,2	4/2:10,7	1/520:16,1	2/4:135,79	9/9:11	4/1:9,9	2/7:4,3	7/2:15,9	1/3:7,2	2/5:11,8		4/3:33,32	1/3:2,1
Tamiami × Solbrio	18MM_532_121	13123.8	1/23:4,4	1/7:19,19	1/3:19,4	4/2:12,11	1/9:4,2	3/576:6,1	4/2:5,2	3/1:6,2	2/4:119,74	9/9:3	4/1:17,15	692/2:1,1	7/2:16,5	1/3:7,5	5/2:13,9		3/4:45,37	3/3:1
Tamiami × Solbrio	18MM_532_69	13123.8	1/23:16,14	1/7:21,16	3/1:10,7	4/2:8,6	1/211:2,1	3/1:3,2	2/4:12,11	1/3:14,12	2/4:128,68	9/9:12	4/1:20,19	2/7:4,4	7/2:28,13	3/1:6,6	2/5:14,9		3/4:28,27	1/3:4,1
Tamiami × Solbrio	18MM_532_92	13123.8	1/23:22,18	7/1:20,8	1/3:10,8	1/2:17,7	3/9:3,2	6/3:9,2	4/2:18,5	1/23:16,1	2/4:150,76	9/11:5,1	4/1:25,20	2/7:4,2	7/2:26,12	1/3:13,7	2/5:8,7		3/4:35,24	1/38:2,1
Tamiami × Solbrio	18MM_532_94	13123.8	1/23:11,8	3/7:20,15	1/3:10,9	1/2:10,10	1/9:2,1	2/3:8,3	4/458:10,1	1/3:9,5	2/1:126,124	9/1:11,4	4/1:23,19	1/7:6,4	7/1:32,29	1/3:8,6	5/1:13,10		3/1:30,28	1/263:5,1
Tamiami × Solbrio	18MM927	13123.8	1/1:82	7/1:23,20	3/1:23,15	1/2:33,15	9/3:6,5	3/1:18,13	4/2:25,16	1/3:16,10	2/4:280,168	9/11:11,1	1/4:39,36	2/7:11,9	7/2:64,35	1/3:26,10	2/5:26,23		3/4:56,47	1/3:5,4
Tamiami × Solbrio	18MM_532_113	10266.4	1/23:3,2	1/7:18,18	1/3:11,10	1/2:9,6	9/3:4,1	6/3:4,2	4/495:6,1	./.:0	2/4:98,58	./.:0	4/1:24,18	7/7:1	7/2:11,5	1/3:7,5	5/2:12,7		3/4:61,58	./.:0
Breeding	Y219_042	1.0753e+06	4/1:52,47	1/7:53,47	1/3:36,29	2/1:58,55	9/3:20,12	3/1:35,26	4/2:56,29	3/1:16,15	2/4:339,211	9/9:25	4/1:14,6	2/7:21,16	7/2:67,28	1/3:40,28	2/1:16,14		1/4:152,144	2/3:5,3
Breeding	Y219_046	1.0753e+06	1/4:45,44	1/7:50,36	3/2:39,29	2/4:51,44	1/9:19,11	3/2:46,29	4/4:59	4/1:32,13	1/2:318,309	1/9:24,20	1/4:22,18	7/5:17,10	7/1:70,69	1/3:36,20	1/2:17,16		1/4:136,102	3/2:6,5
Breeding	Y219_050	1.0753e+06	4/1:62,46	1/7:50,32	1/3:36,30	2/1:53,52	9/3:18,13	3/1:43,40	2/4:38,32	1/3:26,13	2/4:331,240	9/9:33	1/4:22,21	2/7:16,7	7/2:76,40	1/3:34,22	2/1:32,31		1/4:138,135	3/2:8,5
Breeding	Y316_088a	1.0753e+06	3/4:77,67	7/3:77,71	2/3:58,48	4/2:58,53	1/9:20,14	2/3:48,43	4/4:65	1/4:8,4	2/1:417,374	9/1:36,23	1/4:11,3	7/5:20,18	7/1:78,71	1/3:66,31	1/2:12,11		4/1:176,169	3/2:9,8
Breeding	Y316_090a	1.0753e+06	1/4:75,64	7/1:59,56	1/3:53,33	1/2:63,48	9/3:21,15	3/1:48,34	4/2:49,33	1/3:5,4	2/4:343,207	9/9:28	4/1:5,5	2/7:22,17	7/2:77,36	1/3:59,28	1/2:6,3		1/4:157,146	2/3:12,8
Breeding	Y515_086	1.0753e+06	3/4:54,38	7/3:54,31	2/3:27,25	4/2:47,38	9/1:18,14	2/3:25,25	4/4:32	4/1:27,26	1/2:328,324	9/1:25,20	4/1:42,37	5/7:20,12	7/1:82,82	1/3:35,21	2/1:38,19		1/4:134,114	2/3:5,4
Breeding	Y219_044	368675	1/4:59,4	7/1:56,55	3/1:35,27	2/1:54,52	1/9:12,8	2/3:46,38	4/4:44	1/4:11,10	2/1:299,278	1/9:23,21	1/4:7,3	1/7:15,12	7/1:69,64	1/3:46,21	5/4:7,4		1/3:140,132	1/2:7,3
Breeding	Y515_021	368675	1/4:62,58	7/1:74,62	1/3:46,34	2/1:73,58	9/3:17,15	3/1:43,38	4/2:72,30	1/3:3,2	2/4:292,146	9/3:36,3	4/105:1,1	2/7:21,16	7/2:53,24	1/3:49,34	1/2:5,4		4/1:170,158	2/3:9,7
Breeding	Y516_088	368675	1/4:62,55	7/1:64,62	3/1:51,44	2/1:59,56	3/9:17,14	1/3:45,34	4/2:49,41	3/3:1	2/4:277,148	9/9:30	4/26:2,1	2/7:22,21	7/2:51,18	1/3:51,35	2/1:3,3		1/4:168,157	3/2:8,7
Breeding	B37-48	124073	4/23:17,15	3/7:27,16	3/2:18,15	2/1:19,18	9/1:4,4	1/3:13,7	1/4:12,11	2/1:19,8	2/1:251,212	1/9:10,4	4/1:29,25	7/1:6,5	1/7:39,37	1/3:14,10	1/5:18,15		3/1:38,35	2/1:2,2
Breeding	B91-2	124073	4/1:36,32	1/7:27,25	3/1:12,10	1/2:19,18	3/485:4,1	3/6:8,6	2/4:16,15	1/1:35	2/4:215,110	9/11:14,1	4/1:32,31	7/2:7,6	7/2:37,18	1/3:8,5	2/1:26,17		4/3:62,37	2/3:3,2
Breeding	C82-206	124073	4/3:19,16	3/7:20,16	3/2:18,10	2/4:15,12	9/1:6,6	2/3:8,3	4/631:13,1	4/1:15,10	1/2:179,159	9/1:13,10	4/1:24,22	10/7:6,2	7/10:42,18	7/3:6,5	2/5:22,14		4/3:49,36	1/2:4,2
Breeding	C82-217	124073	4/23:26,19	7/3:25,22	2/3:18,7	4/2:28,14	9/1:4,3	3/2:12,7	4/4:20	4/1:22,14	1/2:208,206	1/9:12,9	4/1:26,13	7/709:4,1	1/7:54,50	1/3:22,9	1/5:16,14		3/5:50,46	1/2:7,3
Breeding	C86-78	124073	1/2:53,6	1/7:22,21	3/1:12,8	2/1:18,14	3/9:3,1	6/3:9,6	4/2:13,6	1/1:37	2/4:187,132	9/9:14	1/4:29,18	2/7:8,4	7/2:45,14	1/3:14,7	5/2:14,12		3/4:48,37	3/234:2,1
Breeding	Y516_020	124073	3/4:78,64	7/3:82,71	2/3:37,34	4/2:71,69	1/9:25,21	3/2:47,40	4/4:53	4/3:2,1	2/4:300,141	9/9:36	1/36:2,1	2/7:18,16	7/2:53,34	1/3:46,21	45/481:1,1		1/4:176,139	3/2:12,2
Breeding	Y516_087	124073	3/4:86,69	3/7:84,76	3/2:63,35	2/4:62,43	1/9:23,11	2/3:47,40	4/4:52	4/298:3,1	2/1:248,229	9/1:46,33	4/381:2,1	5/7:23,19	1/7:35,29	1/3:64,37	1/196:4,1		4/1:172,158	3/2:6,3
Breeding	B89-39	40861.2	35/4:27,17	7/1:25,17	3/1:15,14	2/135:19,1	1/9:4,3	1/3:6,3	4/1:16,1	1/12:18,13	2/19:185,173	8/9:9,7	1/4:25,19	7/7:6	14/7:40,40	3/415:8,3	5/12:15,10		3/3:69	1/1:4
Breeding	C82-12	40861.2	4/23:21,16	7/1:24,19	1/3:17,16	2/1:18,10	9/1:3,3	2/3:10,8	4/2:10,8	1/3:16,10	2/4:185,122	9/734:9,1	4/1:21,16	7/2:6,5	7/2:29,18	1/3:9,6	2/5:18,14		3/4:44,37	1/245:2,1
Breeding	C91-212	40861.2	1/2:55,3	1/7:22,16	3/1:21,20	1/2:20,19	1/9:8,5	2/3:11,11	4/4:28	3/1:16,12	2/4:315,184	9/672:10,1	1/4:33,25	2/7:5,3	7/2:63,26	1/3:19,11	2/5:19,17		3/4:53,46	3/1:4,3
Breeding	Y314-373-04	40861.2	4/3:29,22	3/7:25,17	3/2:14,12	2/4:18,9	1/9:8,3	2/3:5,5	4/369:18,1	4/1:13,12	1/2:180,179	9/1:13,6	1/4:22,20	5/7:10,1	7/1:40,28	1/3:9,8	2/5:13,11		4/3:46,32	1/368:5,1
Breeding	C90-15	13123.8	3/1:15,14	7/3:16,14	2/3:10,6	2/1:17,13	9/1:7,1	1/3:7,7	4/1:14,8	2/1:14,12	2/1:191,163	1/9:13,10	1/4:29,21	5/7:5,5	1/7:39,29	1/3:13,6	1/5:21,18		3/5:46,43	2/31:2,1
Breeding	Y310-276	13123.8	1/3:27,24	7/1:24,19	3/1:23,14	2/1:19,14	1/9:5,4	2/3:14,13	4/4:20	4/1:16,14	1/2:263,259	1/9:14,8	1/4:30,20	7/4:4,4	3/7:57,33	1/3:9,6	4/5:23,16		5/3:59,49	4/1:2,2
Breeding	Y314-357-04	13123.8	4/1:26,24	1/7:17,15	1/3:12,10	2/1:11,10	1/9:5,3	2/3:8,6	4/532:17,1	1/4:16,14	1/2:179,172	9/1:9,8	1/4:35,15	7/921:3,1	7/3:43,42	1/3:15,8	5/4:13,10		3/5:43,31	4/1:2,2
Breeding - no known Tamiami	Y309-358	124073	1/3:23,16	7/3:20,17	3/2:16,10	1/2:20,16	1/9:8,5	1/3:11,8	4/1:13,6	4/1:16,11	2/2:349	9/1:11,9	1/4:25,18	10/7:7,3	7/10:40,34	3/7:11,5	2/5:20,13		3/4:42,26	1/2:3,2
Breeding - Zehnder	Y313-233-04	124073	4/1:27,24	7/1:28,14	3/2:16,10	1/2:24,19	1/9:4,2	1/3:9,9	4/1:16,11	1/3:16,8	2/1:188,154	9/1:14,14	4/1:24,24	10/7:9,7	7/10:43,29	7/3:3,2	5/2:23,16		4/3:55,33	2/1:4,3
Breeding - Zehnder	Y313-234-04	124073	4/23:27,15	7/3:22,19	3/2:12,12	4/2:11,10	1/9:4,3	2/3:10,6	4/4:12	4/1:19,16	1/2:158,150	9/1:8,8	1/4:28,24	7/5:6,5	1/7:42,29	1/3:18,5	5/1:24,15		3/5:30,28	1/2:7,3
Diversity Panel	1101.0000A	124073	4/23:108,77	7/7:148	3/3:91	2/2:141	339/339:11	243/243:4	4/4:132	1/1:64	2/2:1280	4/4:56	1/1:55	7/1:16,1	31/31:185	3/3:13	5/5:36		2/2:197	63/63:19
Diversity Panel	1823.0000B	17753.1	4/23:101,76	2/7:46,40	3/1:43,28	2/2:50	9/14:11,4	243/243:16	4/12:43,41	1/1:37	2/2:861	4/4:42	4/1:12,8	7/7:12	23/23:126	./.:0	5/5:18		2/2:100	822/1:3,1
Diversity Panel	1913.0000C	13123.8	4/7:44,4	2/2:103	3/3:23	2/2:39	2/2:8	243/4:8,4	4/4:77	1/1:52	2/2:685	4/4:29	1/1:46	7/931:9,1	49/49:58	3/3:8	5/311:18,1		2/2:163	1/147:8,1
Diversity Panel	2387.0000A	13123.8	4/23:48,33	2/7:67,60	3/3:80	3/2:70,59	1/49:7,1	243/4:19,11	4/4:84	1/1:58	2/2:772	466/466:23	141/1:15,14	7/7:14	153/153:78	3/90:7,1	5/5:38		3/2:82,68	185/342:1,1
